# Supplementary material for: Computational insights into the zeolite-supported gold nanocluster-catalyzed ethanol dehydrogenation to acetaldehyde
Source: Royal Society of Chemistry journal article supplement (doi:10.1039/d3cp05372e), 2024-01-01
Supplement: d3cp05372e1.pdf [file d3cp05372e1.pdf]

*Supporting Information*

**Computational Insights into the Zeolite-Supported Gold  
Nanocluster-Catalyzed Ethanol Dehydrogenation to Acetaldehyde**

*Yi Zhang,<sup>a</sup> Kangjian Tang,<sup>\*a,b</sup> and Xiaoguang Bao<sup>\*a,b</sup>*

<sup>a</sup> *Innovation Center for Chemical Sciences, College of Chemistry, Chemical Engineering and Materials Science, Soochow University, 199 Ren-Ai Road, Suzhou Industrial Park, Suzhou, Jiangsu 215123, China.*

<sup>b</sup> *Jiangsu Key Laboratory of Advanced Negative Carbon Technologies, Soochow University, Suzhou, Jiangsu 215123, China.*

E-mail: [kjtang@suda.edu.cn](mailto:kjtang@suda.edu.cn); [xgbao@suda.edu.cn](mailto:xgbao@suda.edu.cn)

**Contents**

|                                                    |               |
|----------------------------------------------------|---------------|
| <b>1. Zeolite model details</b> .....              | <b>S2</b>     |
| <b>2. Energy calculation</b> .....                 | <b>S2</b>     |
| <b>3. Figure S1~S3</b> .....                       | <b>S2~S3</b>  |
| <b>4. Cartesian Coordinates and Energies</b> ..... | <b>S4~S68</b> |

## 1. Zeolite model

The 34T cluster model shown in Fig. 1 was chosen because it exhibits intersecting straight and sinusoidal channels, which well represents the microstructure of zeolites. The initial structure was constructed from the periodic framework of Silicalite-1 zeolite (using X-ray crystal structure) and then trimmed to obtain an appropriate cluster size. The dangling Si bonds resulting from cutting the cluster were saturated with H atoms, with a bond length of 1.42 Å (corresponding to the Si-H distance in silane) oriented towards the crystal Si-O bonds. This model provides a reasonable-sized cluster to capture the spatial environment provided by the 10-ring windows in Silicalite-1, which has been used in previous studies as well.

## 2. Energy calculation

(a) Adsorption energy is calculated by the following equation:

$$E_{\text{ads}} = E_{\text{sub+cat}} - E_{\text{sub}} - E_{\text{cat}} \quad (\text{eq. 1})$$

where  $E_{\text{sub+cat}}$  is the total energy of substrate adsorbed on the catalyst,  $E_{\text{sub}}$  is the energy of substrate, and  $E_{\text{cat}}$  is the energy of the catalyst.

(b) Binding energy (BE) is calculated by the following equation:

$$\text{BE} = E[\text{Au}_3\text{-S1}] - E[\text{S1}] - E[\text{Au}_3] \quad (\text{eq. 2})$$

where  $E[\text{Au}_3\text{-S1}]$  is the total energy of the  $\text{Au}_3$  cluster anchored at the channel of S1 zeolite,  $E[\text{S1}]$  is the energy of the S1 zeolite, and  $E[\text{Au}_3]$  is the energy of the  $\text{Au}_3$  cluster.

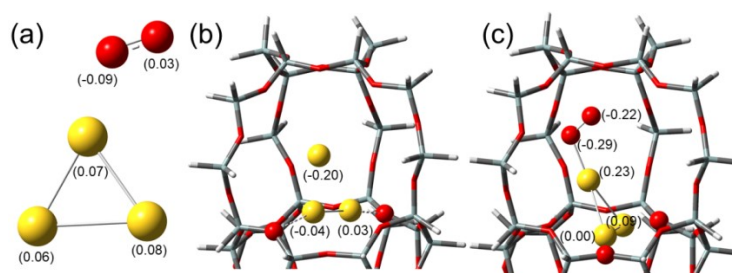

**Fig. S1** (a) Optimized structures and NBO charge analysis for O<sub>2</sub> adsorption on the Au<sub>3</sub> cluster; (b) structure of the Au<sub>3</sub>-S1 model; (c) structure of O<sub>2</sub> adsorption on the Au<sub>3</sub>-S1 model.

Substantial charge transfer is found when O<sub>2</sub> is adsorbed on the gold cluster moiety of the Au<sub>3</sub>-S1 model. Thus, it is reasonable to propose that the Au<sub>3</sub> cluster moiety of Au<sub>3</sub>-S1 model might undergo single electron oxidation in the presence of O<sub>2</sub> to form the Au<sub>3</sub><sup>+</sup>-S1 model.

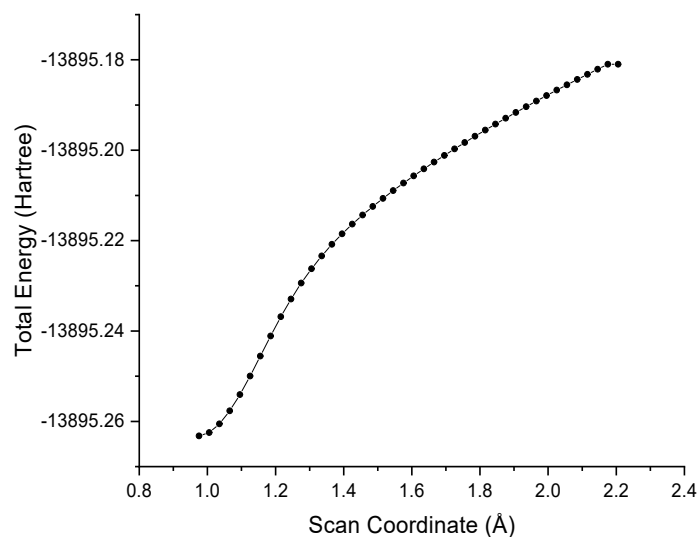

**Fig. S2** The energy profile for the lengthening of the H-O bond of the ethanol adsorbed at the  $\text{Au}_3^+$ -S1 catalyst model, indicating the absence of a transition state for O-H bond breaking of ethanol and H-shift toward to the nearest O atom of the framework of S1. Nevertheless, this route can be excluded due to the significantly endergonic feature of O-H bond breaking of ethanol.

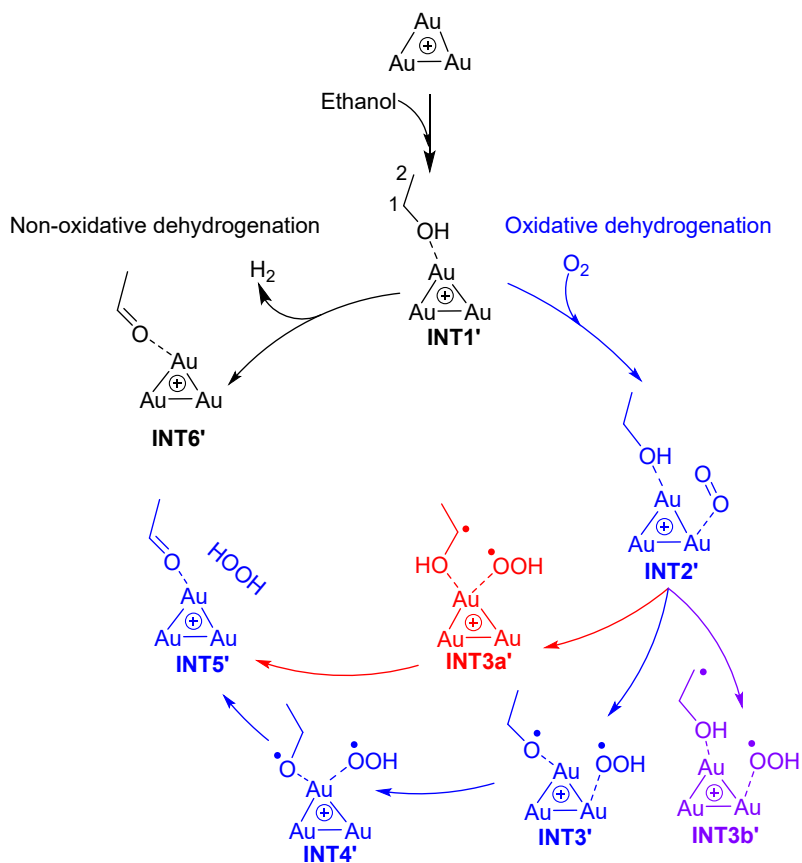

**Fig. S3** Dehydrogenation pathways of ethanol under aerobic and anaerobic conditions catalyzed by  $\text{Au}_3$  cluster cation.

#### 4. Cartesian Coordinates and Energies

Fig. 1 (a)

Charge: 0 multiplicity: 1

| Center<br>Number | Atomic<br>Number | Atomic<br>Type | Coordinates (Angstroms) |           |           |
|------------------|------------------|----------------|-------------------------|-----------|-----------|
|                  |                  |                | X                       | Y         | Z         |
| 1                | 14               | 0              | -4.352983               | -4.937574 | 1.335054  |
| 2                | 14               | 0              | -6.554976               | -2.979526 | 2.355149  |
| 3                | 14               | 0              | -4.433520               | -4.634368 | -1.774582 |
| 4                | 14               | 0              | -6.576236               | -2.547187 | -2.410161 |
| 5                | 8                | 0              | -5.190672               | -3.639054 | 1.791522  |
| 6                | 8                | 0              | -6.763432               | -1.653045 | 1.425734  |
| 7                | 8                | 0              | -4.457787               | -5.252849 | -0.262689 |
| 8                | 8                | 0              | -5.194233               | -3.210160 | -1.864287 |
| 9                | 8                | 0              | -6.436539               | -0.964271 | -2.040565 |
| 10               | 14               | 0              | 1.743342                | -1.788289 | 3.668497  |
| 11               | 14               | 0              | 4.815037                | -1.661151 | 3.650688  |
| 12               | 14               | 0              | 5.721682                | -3.206971 | -1.824068 |
| 13               | 14               | 0              | 3.394854                | -5.047050 | -2.793286 |
| 14               | 14               | 0              | -1.441192               | -4.813173 | -2.674191 |
| 15               | 14               | 0              | 1.716100                | -0.818621 | -3.886555 |
| 16               | 14               | 0              | 4.835425                | -1.041604 | -3.839348 |
| 17               | 14               | 0              | 5.708934                | -3.514227 | 1.323369  |
| 18               | 14               | 0              | 3.445481                | -5.472455 | 1.978991  |
| 19               | 14               | 0              | -1.354704               | -5.123645 | 2.077009  |
| 20               | 14               | 0              | 1.214015                | -3.539440 | 1.112457  |
| 21               | 8                | 0              | 3.281227                | -1.691656 | 4.211791  |
| 22               | 8                | 0              | 4.845191                | -4.506568 | -2.268154 |
| 23               | 8                | 0              | -0.384497               | -3.666455 | -2.202694 |
| 24               | 8                | 0              | 2.202310                | -3.974564 | -2.512127 |
| 25               | 8                | 0              | 5.096933                | -1.829158 | -2.437694 |
| 26               | 8                | 0              | 1.208993                | -1.533843 | -2.523251 |
| 27               | 8                | 0              | -2.927651               | -4.310655 | -2.264161 |
| 28               | 8                | 0              | 5.705446                | -3.014633 | -0.215559 |
| 29               | 8                | 0              | 1.253460                | -2.780342 | -0.304335 |
| 30               | 8                | 0              | 3.313142                | -0.448953 | -3.869717 |
| 31               | 8                | 0              | 4.926144                | -4.938581 | 1.512337  |
| 32               | 8                | 0              | -0.277153               | -4.091828 | 1.413555  |
| 33               | 8                | 0              | 2.239963                | -4.803170 | 1.088281  |
| 34               | 8                | 0              | 4.937291                | -2.359601 | 2.184890  |
| 35               | 8                | 0              | 1.725665                | -2.472771 | 2.207001  |
| 36               | 8                | 0              | -2.840796               | -4.548123 | 1.769411  |
| 37               | 14               | 0              | -7.271698               | -0.118155 | 1.537989  |
| 38               | 14               | 0              | -7.279360               | 0.314438  | -1.500225 |
| 39               | 8                | 0              | -7.139803               | 0.599421  | 0.093081  |
| 40               | 14               | 0              | -0.979793               | 3.283478  | 4.138705  |
| 41               | 14               | 0              | 1.104791                | 1.061373  | 4.427724  |
| 42               | 14               | 0              | 5.857973                | 1.100311  | 4.475922  |
| 43               | 14               | 0              | -4.262442               | 4.238114  | -4.101135 |
| 44               | 14               | 0              | 3.553810                | 3.087829  | 4.003915  |
| 45               | 14               | 0              | -6.685313               | 2.263817  | -3.715517 |
| 46               | 14               | 0              | 2.860228                | 5.542080  | -1.180452 |
| 47               | 14               | 0              | -0.200314               | 5.570349  | -1.114643 |
| 48               | 14               | 0              | -1.267072               | 4.080706  | -3.574116 |
| 49               | 14               | 0              | 1.011399                | 2.125323  | -4.321609 |
| 50               | 14               | 0              | 5.949823                | 1.774494  | -4.374523 |
| 51               | 14               | 0              | -4.012775               | 3.414774  | 4.734541  |
| 52               | 14               | 0              | 3.635237                | 3.680953  | -3.499495 |

|     |    |   |           |           |           |
|-----|----|---|-----------|-----------|-----------|
| 53  | 14 | 0 | -6.387066 | 1.640482  | 3.926958  |
| 54  | 14 | 0 | 2.888874  | 5.147979  | 1.978634  |
| 55  | 14 | 0 | -0.194037 | 5.253149  | 1.996525  |
| 56  | 8  | 0 | -0.193010 | 1.885851  | 3.931815  |
| 57  | 8  | 0 | 1.086282  | -0.308316 | 3.552687  |
| 58  | 8  | 0 | 5.316818  | -0.115930 | 3.515783  |
| 59  | 8  | 0 | 5.012281  | 2.480645  | 4.324014  |
| 60  | 8  | 0 | -5.258949 | 2.961636  | -4.006245 |
| 61  | 8  | 0 | 2.462580  | 1.896335  | 4.125162  |
| 62  | 8  | 0 | 1.318269  | 5.625932  | -1.729820 |
| 63  | 8  | 0 | -1.034423 | 4.060305  | 2.707692  |
| 64  | 8  | 0 | 3.541345  | 3.746604  | 2.509109  |
| 65  | 8  | 0 | -6.686598 | 1.644741  | -2.204136 |
| 66  | 8  | 0 | -2.813134 | 3.645089  | -3.674443 |
| 67  | 8  | 0 | 2.896181  | 5.037123  | 0.361256  |
| 68  | 8  | 0 | -0.181643 | 4.976735  | 0.397717  |
| 69  | 8  | 0 | -0.406393 | 2.749819  | -3.873355 |
| 70  | 8  | 0 | 0.878434  | 0.557024  | -3.956872 |
| 71  | 8  | 0 | 5.901939  | 0.184800  | -3.968025 |
| 72  | 8  | 0 | 4.881877  | 2.639009  | -3.487313 |
| 73  | 8  | 0 | -5.050790 | 2.558514  | 3.822907  |
| 74  | 8  | 0 | 2.219755  | 2.872330  | -3.519274 |
| 75  | 8  | 0 | 1.352265  | 5.302585  | 2.553156  |
| 76  | 8  | 0 | -1.089481 | 4.590206  | -2.038577 |
| 77  | 8  | 0 | 3.740559  | 4.545411  | -2.116956 |
| 78  | 8  | 0 | -6.369218 | 0.701271  | 2.600181  |
| 79  | 8  | 0 | -2.491127 | 2.879091  | 4.537868  |
| 80  | 1  | 0 | -7.673765 | -3.873147 | 2.118214  |
| 81  | 1  | 0 | -7.674984 | -3.224426 | -1.719075 |
| 82  | 1  | 0 | -8.639298 | -0.171478 | 1.992051  |
| 83  | 1  | 0 | -8.671378 | 0.052712  | -1.837519 |
| 84  | 1  | 0 | -7.597689 | 2.441465  | 4.077600  |
| 85  | 1  | 0 | -7.668628 | 3.311144  | -3.679883 |
| 86  | 1  | 0 | -4.626610 | 5.398035  | -3.205477 |
| 87  | 1  | 0 | -4.247434 | 4.781653  | 4.353861  |
| 88  | 1  | 0 | -0.879624 | 6.481875  | 2.338733  |
| 89  | 1  | 0 | -0.806344 | 6.890694  | -1.109628 |
| 90  | 1  | 0 | -4.885267 | -6.109386 | 2.008142  |
| 91  | 1  | 0 | -5.093075 | -5.609691 | -2.625319 |
| 92  | 1  | 0 | -1.299340 | -6.462071 | 1.476858  |
| 93  | 1  | 0 | -1.208258 | -6.105092 | -2.036529 |
| 94  | 1  | 0 | 3.372687  | -6.855939 | 1.595229  |
| 95  | 1  | 0 | 3.145719  | -6.290831 | -2.096255 |
| 96  | 1  | 0 | 7.078899  | -3.750444 | 1.738171  |
| 97  | 1  | 0 | 7.061516  | -3.480177 | -2.301007 |
| 98  | 1  | 0 | 7.127477  | 1.529499  | 4.013936  |
| 99  | 1  | 0 | 7.274876  | 2.260820  | -4.069323 |
| 100 | 1  | 0 | 3.637014  | 6.313198  | 2.466628  |
| 101 | 1  | 0 | 3.406387  | 6.869437  | -1.220109 |
| 102 | 1  | 0 | -6.361490 | 0.822691  | 5.108796  |
| 103 | 1  | 0 | -6.429956 | -2.721638 | 3.804447  |
| 104 | 1  | 0 | -4.202311 | 3.283335  | 6.152130  |
| 105 | 1  | 0 | -0.341718 | 4.122289  | 5.179732  |
| 106 | 1  | 0 | 3.359011  | 4.122405  | 4.983403  |
| 107 | 1  | 0 | 1.027713  | 0.817320  | 5.865763  |
| 108 | 1  | 0 | 5.876436  | 0.680589  | 5.875643  |
| 109 | 1  | 0 | 5.596321  | -2.417790 | 4.608432  |
| 110 | 1  | 0 | -1.163775 | -5.145011 | 3.526584  |
| 111 | 1  | 0 | 3.259939  | -5.221815 | 3.436717  |
| 112 | 1  | 0 | 0.996170  | -2.591096 | 4.596006  |

|     |    |   |           |           |           |
|-----|----|---|-----------|-----------|-----------|
| 113 | 1  | 0 | 3.438715  | -5.227408 | -4.235663 |
| 114 | 1  | 0 | -1.396181 | -4.989702 | -4.113833 |
| 115 | 1  | 0 | 5.022796  | -1.955694 | -4.957515 |
| 116 | 1  | 0 | 1.407113  | -1.660270 | -5.030880 |
| 117 | 1  | 0 | -6.766887 | -2.698474 | -3.866899 |
| 118 | 1  | 0 | 5.667302  | 1.934785  | -5.807111 |
| 119 | 1  | 0 | 3.727597  | 4.574888  | -4.664434 |
| 120 | 1  | 0 | -0.883151 | 5.108029  | -4.556386 |
| 121 | 1  | 0 | -4.170046 | 4.511778  | -5.530537 |
| 122 | 1  | 0 | -6.942906 | 1.246017  | -4.749004 |
| 123 | 1  | 0 | 1.210035  | 2.220277  | -5.754077 |
| 124 | 14 | 0 | 1.059351  | -3.009138 | -1.889955 |

-----

Zero-point correction= 0.308019 (Hartree/Particle)  
Thermal correction to Energy= 0.379304  
Thermal correction to Enthalpy= 0.380249  
Thermal correction to Gibbs Free Energy= 0.219642  
Sum of electronic and zero-point Energies= -13333.718995  
Sum of electronic and thermal Energies= -13333.647710  
Sum of electronic and thermal Enthalpies= -13333.646766  
Sum of electronic and thermal Free Energies= -13333.807372

M06-L/def2-TZVP//b3lyp/6-31G(d,p)-LANL2DZ Single point energy: -13335.706188

**Fig. 1 (b)**

**Charge: 0 multiplicity: 2**

-----

| Center<br>Number | Atomic<br>Number | Atomic<br>Type | Coordinates (Angstroms) |          |           |
|------------------|------------------|----------------|-------------------------|----------|-----------|
|                  |                  |                | X                       | Y        | Z         |
| 1                | 14               | 0              | 4.122343                | 5.037056 | 1.419625  |
| 2                | 14               | 0              | 6.348859                | 3.060065 | 2.346234  |
| 3                | 14               | 0              | 4.161857                | 4.828792 | -1.695018 |
| 4                | 14               | 0              | 6.304782                | 2.772863 | -2.427241 |
| 5                | 8                | 0              | 4.976302                | 3.733240 | 1.821688  |
| 6                | 8                | 0              | 6.560693                | 1.771621 | 1.365932  |
| 7                | 8                | 0              | 4.197221                | 5.411352 | -0.169063 |
| 8                | 8                | 0              | 4.929164                | 3.414792 | -1.840865 |
| 9                | 8                | 0              | 6.179926                | 1.178424 | -2.109434 |
| 10               | 14               | 0              | -1.922294               | 1.788564 | 3.737457  |
| 11               | 14               | 0              | -4.991156               | 1.643488 | 3.763972  |
| 12               | 14               | 0              | -5.990374               | 3.356355 | -1.640476 |
| 13               | 14               | 0              | -3.691562               | 5.227625 | -2.595969 |
| 14               | 14               | 0              | 1.162548                | 5.025621 | -2.550921 |
| 15               | 14               | 0              | -1.999002               | 1.046060 | -3.843894 |
| 16               | 14               | 0              | -5.125134               | 1.259539 | -3.733850 |
| 17               | 14               | 0              | -5.929560               | 3.563610 | 1.512266  |
| 18               | 14               | 0              | -3.671070               | 5.512140 | 2.192372  |
| 19               | 14               | 0              | 1.135398                | 5.183349 | 2.208426  |
| 20               | 14               | 0              | -1.443507               | 3.622303 | 1.233188  |
| 21               | 8                | 0              | -3.451292               | 1.667815 | 4.307307  |
| 22               | 8                | 0              | -5.132832               | 4.679295 | -2.056954 |
| 23               | 8                | 0              | 0.087694                | 3.877796 | -2.113227 |
| 24               | 8                | 0              | -2.519042               | 4.101807 | -2.411847 |
| 25               | 8                | 0              | -5.366732               | 2.001594 | -2.306415 |
| 26               | 8                | 0              | -1.427711               | 1.692582 | -2.444139 |
| 27               | 8                | 0              | 2.649231                | 4.507410 | -2.177541 |
| 28               | 8                | 0              | -5.945876               | 3.110217 | -0.041902 |
| 29               | 8                | 0              | -1.530980               | 2.921991 | -0.217201 |

|    |    |   |           |           |           |
|----|----|---|-----------|-----------|-----------|
| 30 | 8  | 0 | -3.591346 | 0.688455  | -3.786939 |
| 31 | 8  | 0 | -5.158638 | 4.989962  | 1.731478  |
| 32 | 8  | 0 | 0.046287  | 4.179495  | 1.516021  |
| 33 | 8  | 0 | -2.480354 | 4.878936  | 1.257917  |
| 34 | 8  | 0 | -5.135360 | 2.387869  | 2.322025  |
| 35 | 8  | 0 | -1.937518 | 2.519143  | 2.297526  |
| 36 | 8  | 0 | 2.619211  | 4.628018  | 1.867377  |
| 37 | 14 | 0 | 7.068112  | 0.234409  | 1.429025  |
| 38 | 14 | 0 | 7.033751  | -0.111301 | -1.614601 |
| 39 | 8  | 0 | 6.926010  | -0.450442 | -0.030038 |
| 40 | 14 | 0 | 0.831107  | -3.278099 | 4.021861  |
| 41 | 14 | 0 | -1.260079 | -1.074832 | 4.404668  |
| 42 | 14 | 0 | -6.010555 | -1.145969 | 4.516208  |
| 43 | 14 | 0 | 4.004134  | -3.964333 | -4.294086 |
| 44 | 14 | 0 | -3.702133 | -3.108949 | 3.949596  |
| 45 | 14 | 0 | 6.419780  | -1.989818 | -3.880516 |
| 46 | 14 | 0 | -3.072008 | -5.397463 | -1.316990 |
| 47 | 14 | 0 | -0.015368 | -5.415649 | -1.304994 |
| 48 | 14 | 0 | 1.018838  | -3.841192 | -3.719560 |
| 49 | 14 | 0 | -1.285928 | -1.886492 | -4.375425 |
| 50 | 14 | 0 | -6.226637 | -1.552007 | -4.346701 |
| 51 | 14 | 0 | 3.886763  | -3.416886 | 4.561978  |
| 52 | 14 | 0 | -3.893884 | -3.471972 | -3.561577 |
| 53 | 14 | 0 | 6.230182  | -1.598884 | 3.775025  |
| 54 | 14 | 0 | -3.064785 | -5.101573 | 1.853925  |
| 55 | 14 | 0 | 0.006626  | -5.198195 | 1.826358  |
| 56 | 8  | 0 | 0.055472  | -1.868895 | 3.899640  |
| 57 | 8  | 0 | -1.266514 | 0.314743  | 3.569169  |
| 58 | 8  | 0 | -5.489211 | 0.100587  | 3.584134  |
| 59 | 8  | 0 | -5.154969 | -2.513938 | 4.313751  |
| 60 | 8  | 0 | 4.994463  | -2.686306 | -4.182195 |
| 61 | 8  | 0 | -2.600366 | -1.929939 | 4.083918  |
| 62 | 8  | 0 | -1.541336 | -5.455714 | -1.902925 |
| 63 | 8  | 0 | 0.824644  | -3.964575 | 2.526141  |
| 64 | 8  | 0 | -3.716378 | -3.721429 | 2.433979  |
| 65 | 8  | 0 | 6.439869  | -1.425366 | -2.349353 |
| 66 | 8  | 0 | 2.557487  | -3.389818 | -3.831247 |
| 67 | 8  | 0 | -3.079398 | -4.945197 | 0.241553  |
| 68 | 8  | 0 | -0.023191 | -4.892860 | 0.236283  |
| 69 | 8  | 0 | 0.140604  | -2.509970 | -3.969788 |
| 70 | 8  | 0 | -1.157277 | -0.318928 | -3.979554 |
| 71 | 8  | 0 | -6.177203 | 0.025922  | -3.891514 |
| 72 | 8  | 0 | -5.145325 | -2.436822 | -3.498219 |
| 73 | 8  | 0 | 4.899795  | -2.527854 | 3.660186  |
| 74 | 8  | 0 | -2.487021 | -2.647428 | -3.579140 |
| 75 | 8  | 0 | -1.521895 | -5.280553 | 2.417014  |
| 76 | 8  | 0 | 0.866713  | -4.406005 | -2.199635 |
| 77 | 8  | 0 | -3.977094 | -4.377951 | -2.204771 |
| 78 | 8  | 0 | 6.185529  | -0.616286 | 2.484249  |
| 79 | 8  | 0 | 2.353037  | -2.907469 | 4.388446  |
| 80 | 1  | 0 | 7.459788  | 3.968291  | 2.123425  |
| 81 | 1  | 0 | 7.409485  | 3.437973  | -1.731749 |
| 82 | 1  | 0 | 8.442003  | 0.277574  | 1.869595  |
| 83 | 1  | 0 | 8.420547  | 0.171438  | -1.965151 |
| 84 | 1  | 0 | 7.443377  | -2.403908 | 3.888081  |
| 85 | 1  | 0 | 7.407947  | -3.034200 | -3.892758 |
| 86 | 1  | 0 | 4.383523  | -5.151256 | -3.440036 |
| 87 | 1  | 0 | 4.109195  | -4.769731 | 4.139326  |
| 88 | 1  | 0 | 0.721709  | -6.425535 | 2.120313  |
| 89 | 1  | 0 | 0.600934  | -6.728281 | -1.337575 |

|     |    |   |           |           |           |
|-----|----|---|-----------|-----------|-----------|
| 90  | 1  | 0 | 4.658860  | 6.191582  | 2.121722  |
| 91  | 1  | 0 | 4.802880  | 5.835869  | -2.527325 |
| 92  | 1  | 0 | 1.063928  | 6.540853  | 1.652193  |
| 93  | 1  | 0 | 0.924571  | 6.291642  | -1.869032 |
| 94  | 1  | 0 | -3.607850 | 6.905455  | 1.848591  |
| 95  | 1  | 0 | -3.430795 | 6.455342  | -1.861324 |
| 96  | 1  | 0 | -7.295992 | 3.776838  | 1.948018  |
| 97  | 1  | 0 | -7.334924 | 3.631029  | -2.097417 |
| 98  | 1  | 0 | -7.285570 | -1.570779 | 4.060373  |
| 99  | 1  | 0 | -7.544714 | -2.053968 | -4.038711 |
| 100 | 1  | 0 | -3.793969 | -6.285532 | 2.317326  |
| 101 | 1  | 0 | -3.612478 | -6.726818 | -1.387616 |
| 102 | 1  | 0 | 6.213919  | -0.824385 | 4.986042  |
| 103 | 1  | 0 | 6.245967  | 2.758698  | 3.790742  |
| 104 | 1  | 0 | 4.082223  | -3.327706 | 5.983382  |
| 105 | 1  | 0 | 0.212402  | -4.157358 | 5.040128  |
| 106 | 1  | 0 | -3.490689 | -4.171727 | 4.896182  |
| 107 | 1  | 0 | -1.163677 | -0.882543 | 5.846992  |
| 108 | 1  | 0 | -6.012375 | -0.772717 | 5.929537  |
| 109 | 1  | 0 | -5.765965 | 2.364671  | 4.754653  |
| 110 | 1  | 0 | 0.964255  | 5.160708  | 3.662052  |
| 111 | 1  | 0 | -3.460623 | 5.216098  | 3.637057  |
| 112 | 1  | 0 | -1.167380 | 2.563327  | 4.682596  |
| 113 | 1  | 0 | -3.748855 | 5.456781  | -4.028252 |
| 114 | 1  | 0 | 1.088364  | 5.241703  | -3.982110 |
| 115 | 1  | 0 | -5.326770 | 2.200202  | -4.828212 |
| 116 | 1  | 0 | -1.710776 | 1.926563  | -4.961435 |
| 117 | 1  | 0 | 6.473354  | 2.973260  | -3.881632 |
| 118 | 1  | 0 | -5.963726 | -1.665844 | -5.788116 |
| 119 | 1  | 0 | -3.994752 | -4.329250 | -4.754942 |
| 120 | 1  | 0 | 0.619776  | -4.840283 | -4.728429 |
| 121 | 1  | 0 | 3.889382  | -4.196431 | -5.729985 |
| 122 | 1  | 0 | 6.656680  | -0.941166 | -4.887344 |
| 123 | 1  | 0 | -1.504825 | -1.928538 | -5.806790 |
| 124 | 14 | 0 | -1.332170 | 3.191044  | -1.791519 |
| 125 | 79 | 0 | -0.313568 | -0.035851 | -0.927190 |
| 126 | 79 | 0 | 0.603180  | -1.816500 | 0.715369  |
| 127 | 79 | 0 | 2.237165  | 0.492575  | 0.277000  |

-----

Zero-point correction= 0.308999 (Hartree/Particle)  
Thermal correction to Energy= 0.387925  
Thermal correction to Enthalpy= 0.388869  
Thermal correction to Gibbs Free Energy= 0.201663  
Sum of electronic and zero-point Energies= -13739.989811  
Sum of electronic and thermal Energies= -13739.910884  
Sum of electronic and thermal Enthalpies= -13739.909940  
Sum of electronic and thermal Free Energies= -13740.097146

M06-L/def2-TZVP//b3lyp/6-31G(d,p)-LANL2DZ Single point energy: -13743.2401912

**Fig. 1 (c)**

**Charge: 0 multiplicity: 2**

-----

| Center<br>Number | Atomic<br>Number | Atomic<br>Type | Coordinates (Angstroms) |           |           |
|------------------|------------------|----------------|-------------------------|-----------|-----------|
|                  |                  |                | X                       | Y         | Z         |
| 1                | 14               | 0              | 4.385928                | -4.127716 | 1.065141  |
| 2                | 14               | 0              | 6.498277                | -2.154361 | -0.138825 |
| 3                | 14               | 0              | 3.884606                | -3.061390 | 3.946289  |

-----



|    |    |   |           |           |           |
|----|----|---|-----------|-----------|-----------|
| 4  | 14 | 0 | 5.634255  | -0.575860 | 4.294452  |
| 5  | 8  | 0 | 5.154315  | -2.845576 | 0.450484  |
| 6  | 8  | 0 | 6.358063  | -0.615616 | 0.413420  |
| 7  | 8  | 0 | 4.238598  | -4.043189 | 2.689484  |
| 8  | 8  | 0 | 4.459697  | -1.560758 | 3.741819  |
| 9  | 8  | 0 | 5.380897  | 0.827284  | 3.498975  |
| 10 | 14 | 0 | -1.514438 | -2.615261 | -2.864941 |
| 11 | 14 | 0 | -4.540821 | -2.955376 | -3.318717 |
| 12 | 14 | 0 | -6.211463 | -3.246970 | 2.185931  |
| 13 | 14 | 0 | -3.899607 | -4.411548 | 3.925791  |
| 14 | 14 | 0 | 0.823455  | -3.468984 | 4.429017  |
| 15 | 14 | 0 | -2.929474 | 0.164915  | 4.082375  |
| 16 | 14 | 0 | -5.944824 | -0.544832 | 3.657226  |
| 17 | 14 | 0 | -5.611876 | -4.310627 | -0.732468 |
| 18 | 14 | 0 | -3.070645 | -5.993184 | -0.520125 |
| 19 | 14 | 0 | 1.610808  | -4.940796 | -0.033149 |
| 20 | 14 | 0 | -1.255479 | -3.583142 | 0.114954  |
| 21 | 8  | 0 | -2.935631 | -2.841236 | -3.634764 |
| 22 | 8  | 0 | -5.289243 | -4.250372 | 3.078980  |
| 23 | 8  | 0 | -0.259568 | -2.650796 | 3.527454  |
| 24 | 8  | 0 | -2.809152 | -3.266748 | 3.536369  |
| 25 | 8  | 0 | -5.861755 | -1.681045 | 2.491507  |
| 26 | 8  | 0 | -2.116089 | -0.772203 | 3.039472  |
| 27 | 8  | 0 | 2.291086  | -2.849202 | 4.119220  |
| 28 | 8  | 0 | -5.929391 | -3.451754 | 0.601820  |
| 29 | 8  | 0 | -1.629084 | -2.506696 | 1.248480  |
| 30 | 8  | 0 | -4.531009 | 0.270616  | 3.743762  |
| 31 | 8  | 0 | -4.665441 | -5.610802 | -0.431211 |
| 32 | 8  | 0 | 0.306780  | -3.981543 | 0.188684  |
| 33 | 8  | 0 | -2.147023 | -4.929920 | 0.320920  |
| 34 | 8  | 0 | -4.824068 | -3.300206 | -1.753139 |
| 35 | 8  | 0 | -1.678104 | -2.897111 | -1.288250 |
| 36 | 8  | 0 | 2.941220  | -4.087817 | 0.339321  |
| 37 | 14 | 0 | 6.732873  | 0.907003  | -0.020774 |
| 38 | 14 | 0 | 6.158191  | 2.054387  | 2.769916  |
| 39 | 8  | 0 | 6.272818  | 1.918021  | 1.155817  |
| 40 | 14 | 0 | 0.655190  | 2.560899  | -4.283258 |
| 41 | 14 | 0 | -1.103745 | 0.036069  | -4.276259 |
| 42 | 14 | 0 | -5.731897 | -0.680087 | -4.986964 |
| 43 | 14 | 0 | 2.310121  | 5.978871  | 3.781430  |
| 44 | 14 | 0 | -3.797434 | 1.689737  | -4.742368 |
| 45 | 14 | 0 | 4.968868  | 4.368877  | 4.279330  |
| 46 | 14 | 0 | -4.291890 | 5.413469  | -0.348350 |
| 47 | 14 | 0 | -1.291040 | 5.898219  | 0.012347  |
| 48 | 14 | 0 | -0.507400 | 5.236268  | 2.901298  |
| 49 | 14 | 0 | -2.646755 | 3.196241  | 3.812598  |
| 50 | 14 | 0 | -7.446830 | 2.107575  | 3.263550  |
| 51 | 14 | 0 | 3.707101  | 2.992868  | -4.460510 |
| 52 | 14 | 0 | -5.245607 | 4.076995  | 2.247396  |
| 53 | 14 | 0 | 6.085957  | 1.863748  | -2.892964 |
| 54 | 14 | 0 | -3.717827 | 4.261815  | -3.261427 |
| 55 | 14 | 0 | -0.714815 | 4.837423  | -2.871029 |
| 56 | 8  | 0 | -0.046689 | 1.169341  | -3.821390 |
| 57 | 8  | 0 | -1.031911 | -1.046274 | -3.035145 |
| 58 | 8  | 0 | -5.238163 | -1.522881 | -3.666710 |
| 59 | 8  | 0 | -5.106565 | 0.819421  | -5.095069 |
| 60 | 8  | 0 | 3.444176  | 4.887898  | 4.175316  |
| 61 | 8  | 0 | -2.599435 | 0.644738  | -4.390841 |
| 62 | 8  | 0 | -2.891009 | 5.867467  | 0.372295  |
| 63 | 8  | 0 | 0.373261  | 3.655923  | -3.112136 |

|     |   |   |           |           |           |
|-----|---|---|-----------|-----------|-----------|
| 64  | 8 | 0 | -4.096000 | 2.684010  | -3.482806 |
| 65  | 8 | 0 | 5.301100  | 3.406482  | 3.001655  |
| 66  | 8 | 0 | 1.036186  | 5.079981  | 3.329316  |
| 67  | 8 | 0 | -3.997736 | 4.546948  | -1.690611 |
| 68  | 8 | 0 | -0.981477 | 4.955024  | -1.275490 |
| 69  | 8 | 0 | -1.251114 | 3.901996  | 3.419281  |
| 70  | 8 | 0 | -2.274127 | 1.626664  | 3.901441  |
| 71  | 8 | 0 | -7.153004 | 0.492486  | 3.303238  |
| 72  | 8 | 0 | -6.343519 | 2.881852  | 2.336110  |
| 73  | 8 | 0 | 4.661626  | 2.575212  | -3.215351 |
| 74  | 8 | 0 | -3.771543 | 3.527909  | 2.676970  |
| 75  | 8 | 0 | -2.131944 | 4.504897  | -3.639052 |
| 76  | 8 | 0 | -0.469292 | 5.321085  | 1.275578  |
| 77  | 8 | 0 | -5.207087 | 4.549964  | 0.682546  |
| 78  | 8 | 0 | 5.949262  | 1.310143  | -1.370289 |
| 79  | 8 | 0 | 2.241402  | 2.288901  | -4.345290 |
| 80  | 1 | 0 | 7.654161  | -2.777399 | 0.483943  |
| 81  | 1 | 0 | 6.908853  | -1.219774 | 3.971628  |
| 82  | 1 | 0 | 8.157686  | 0.946476  | -0.243894 |
| 83  | 1 | 0 | 7.491920  | 2.100541  | 3.353576  |
| 84  | 1 | 0 | 7.209372  | 2.778267  | -3.073588 |
| 85  | 1 | 0 | 5.819577  | 5.514792  | 4.104142  |
| 86  | 1 | 0 | 2.691773  | 6.927076  | 2.670148  |
| 87  | 1 | 0 | 3.716718  | 4.433789  | -4.429173 |
| 88  | 1 | 0 | -0.122698 | 6.033042  | -3.431683 |
| 89  | 1 | 0 | -0.845502 | 7.254578  | -0.261652 |
| 90  | 1 | 0 | 5.160658  | -5.322248 | 0.791817  |
| 91  | 1 | 0 | 4.494576  | -3.681108 | 5.107467  |
| 92  | 1 | 0 | 1.600397  | -6.084213 | 0.888984  |
| 93  | 1 | 0 | 0.854624  | -4.899185 | 4.132307  |
| 94  | 1 | 0 | -2.903440 | -7.211900 | 0.225024  |
| 95  | 1 | 0 | -3.392936 | -5.735023 | 3.627549  |
| 96  | 1 | 0 | -6.854163 | -4.846139 | -1.256737 |
| 97  | 1 | 0 | -7.576266 | -3.599065 | 2.526340  |
| 98  | 1 | 0 | -7.099539 | -0.353998 | -4.837210 |
| 99  | 1 | 0 | -8.744360 | 2.295837  | 2.657361  |
| 100 | 1 | 0 | -4.498352 | 5.142641  | -4.142756 |
| 101 | 1 | 0 | -4.982436 | 6.610421  | -0.741888 |
| 102 | 1 | 0 | 6.364357  | 0.785880  | -3.800445 |
| 103 | 1 | 0 | 6.603324  | -2.278564 | -1.604913 |
| 104 | 1 | 0 | 4.157475  | 2.553544  | -5.752475 |
| 105 | 1 | 0 | 0.116443  | 2.997634  | -5.589778 |
| 106 | 1 | 0 | -3.537228 | 2.473985  | -5.921959 |
| 107 | 1 | 0 | -0.728610 | -0.545497 | -5.558162 |
| 108 | 1 | 0 | -5.453453 | -1.427748 | -6.211686 |
| 109 | 1 | 0 | -5.051407 | -4.041629 | -4.140335 |
| 110 | 1 | 0 | 1.678429  | -5.344370 | -1.435013 |
| 111 | 1 | 0 | -2.654934 | -6.079333 | -1.949755 |
| 112 | 1 | 0 | -0.535244 | -3.493769 | -3.436886 |
| 113 | 1 | 0 | -4.175042 | -4.240126 | 5.344341  |
| 114 | 1 | 0 | 0.547869  | -3.295400 | 5.843560  |
| 115 | 1 | 0 | -6.220849 | -1.176382 | 4.941070  |
| 116 | 1 | 0 | -2.731073 | -0.317107 | 5.440008  |
| 117 | 1 | 0 | 5.584503  | -0.332413 | 5.752948  |
| 118 | 1 | 0 | -7.440163 | 2.656073  | 4.627082  |
| 119 | 1 | 0 | -5.641291 | 5.204487  | 3.107887  |
| 120 | 1 | 0 | -1.173424 | 6.400795  | 3.510278  |
| 121 | 1 | 0 | 1.937625  | 6.575406  | 5.059163  |
| 122 | 1 | 0 | 5.155832  | 3.686437  | 5.570773  |
| 123 | 1 | 0 | -3.104042 | 3.605000  | 5.126213  |

|     |    |   |           |           |           |
|-----|----|---|-----------|-----------|-----------|
| 124 | 14 | 0 | -1.689162 | -2.315618 | 2.850898  |
| 125 | 79 | 0 | 3.258917  | -1.806386 | -2.774412 |
| 126 | 79 | 0 | 3.174544  | -0.600866 | -0.136060 |
| 127 | 79 | 0 | 1.013493  | -0.553878 | -1.576750 |

-----

Zero-point correction= 0.308947 (Hartree/Particle)  
 Thermal correction to Energy= 0.387777  
 Thermal correction to Enthalpy= 0.388721  
 Thermal correction to Gibbs Free Energy= 0.201706  
 Sum of electronic and zero-point Energies= -13739.989177  
 Sum of electronic and thermal Energies= -13739.910347  
 Sum of electronic and thermal Enthalpies= -13739.909403  
 Sum of electronic and thermal Free Energies= -13740.096418

M06-L/def2-TZVP//b3lyp/6-31G(d,p)-LANL2DZ Single point energy: -13743.239318

**Fig. 1 (d)**

**Charge: 0 multiplicity: 2**

| Center<br>Number | Atomic<br>Number | Atomic<br>Type | Coordinates (Angstroms) |           |           |
|------------------|------------------|----------------|-------------------------|-----------|-----------|
|                  |                  |                | X                       | Y         | Z         |
| 1                | 14               | 0              | 4.385928                | -4.127716 | 1.065141  |
| 2                | 14               | 0              | 6.498277                | -2.154361 | -0.138825 |
| 3                | 14               | 0              | 3.884606                | -3.061390 | 3.946289  |
| 4                | 14               | 0              | 5.634255                | -0.575860 | 4.294452  |
| 5                | 8                | 0              | 5.154315                | -2.845576 | 0.450484  |
| 6                | 8                | 0              | 6.358063                | -0.615616 | 0.413420  |
| 7                | 8                | 0              | 4.238598                | -4.043189 | 2.689484  |
| 8                | 8                | 0              | 4.459697                | -1.560758 | 3.741819  |
| 9                | 8                | 0              | 5.380897                | 0.827284  | 3.498975  |
| 10               | 14               | 0              | -1.514438               | -2.615261 | -2.864941 |
| 11               | 14               | 0              | -4.540821               | -2.955376 | -3.318717 |
| 12               | 14               | 0              | -6.211463               | -3.246970 | 2.185931  |
| 13               | 14               | 0              | -3.899607               | -4.411548 | 3.925791  |
| 14               | 14               | 0              | 0.823455                | -3.468984 | 4.429017  |
| 15               | 14               | 0              | -2.929474               | 0.164915  | 4.082375  |
| 16               | 14               | 0              | -5.944824               | -0.544832 | 3.657226  |
| 17               | 14               | 0              | -5.611876               | -4.310627 | -0.732468 |
| 18               | 14               | 0              | -3.070645               | -5.993184 | -0.520125 |
| 19               | 14               | 0              | 1.610808                | -4.940796 | -0.033149 |
| 20               | 14               | 0              | -1.255479               | -3.583142 | 0.114954  |
| 21               | 8                | 0              | -2.935631               | -2.841236 | -3.634764 |
| 22               | 8                | 0              | -5.289243               | -4.250372 | 3.078980  |
| 23               | 8                | 0              | -0.259568               | -2.650796 | 3.527454  |
| 24               | 8                | 0              | -2.809152               | -3.266748 | 3.536369  |
| 25               | 8                | 0              | -5.861755               | -1.681045 | 2.491507  |
| 26               | 8                | 0              | -2.116089               | -0.772203 | 3.039472  |
| 27               | 8                | 0              | 2.291086                | -2.849202 | 4.119220  |
| 28               | 8                | 0              | -5.929391               | -3.451754 | 0.601820  |
| 29               | 8                | 0              | -1.629084               | -2.506696 | 1.248480  |
| 30               | 8                | 0              | -4.531009               | 0.270616  | 3.743762  |
| 31               | 8                | 0              | -4.665441               | -5.610802 | -0.431211 |
| 32               | 8                | 0              | 0.306780                | -3.981543 | 0.188684  |
| 33               | 8                | 0              | -2.147023               | -4.929920 | 0.320920  |
| 34               | 8                | 0              | -4.824068               | -3.300206 | -1.753139 |
| 35               | 8                | 0              | -1.678104               | -2.897111 | -1.288250 |
| 36               | 8                | 0              | 2.941220                | -4.087817 | 0.339321  |
| 37               | 14               | 0              | 6.732873                | 0.907003  | -0.020774 |

|    |    |   |           |           |           |
|----|----|---|-----------|-----------|-----------|
| 38 | 14 | 0 | 6.158191  | 2.054387  | 2.769916  |
| 39 | 8  | 0 | 6.272818  | 1.918021  | 1.155817  |
| 40 | 14 | 0 | 0.655190  | 2.560899  | -4.283258 |
| 41 | 14 | 0 | -1.103745 | 0.036069  | -4.276259 |
| 42 | 14 | 0 | -5.731897 | -0.680087 | -4.986964 |
| 43 | 14 | 0 | 2.310121  | 5.978871  | 3.781430  |
| 44 | 14 | 0 | -3.797434 | 1.689737  | -4.742368 |
| 45 | 14 | 0 | 4.968868  | 4.368877  | 4.279330  |
| 46 | 14 | 0 | -4.291890 | 5.413469  | -0.348350 |
| 47 | 14 | 0 | -1.291040 | 5.898219  | 0.012347  |
| 48 | 14 | 0 | -0.507400 | 5.236268  | 2.901298  |
| 49 | 14 | 0 | -2.646755 | 3.196241  | 3.812598  |
| 50 | 14 | 0 | -7.446830 | 2.107575  | 3.263550  |
| 51 | 14 | 0 | 3.707101  | 2.992868  | -4.460510 |
| 52 | 14 | 0 | -5.245607 | 4.076995  | 2.247396  |
| 53 | 14 | 0 | 6.085957  | 1.863748  | -2.892964 |
| 54 | 14 | 0 | -3.717827 | 4.261815  | -3.261427 |
| 55 | 14 | 0 | -0.714815 | 4.837423  | -2.871029 |
| 56 | 8  | 0 | -0.046689 | 1.169341  | -3.821390 |
| 57 | 8  | 0 | -1.031911 | -1.046274 | -3.035145 |
| 58 | 8  | 0 | -5.238163 | -1.522881 | -3.666710 |
| 59 | 8  | 0 | -5.106565 | 0.819421  | -5.095069 |
| 60 | 8  | 0 | 3.444176  | 4.887898  | 4.175316  |
| 61 | 8  | 0 | -2.599435 | 0.644738  | -4.390841 |
| 62 | 8  | 0 | -2.891009 | 5.867467  | 0.372295  |
| 63 | 8  | 0 | 0.373261  | 3.655923  | -3.112136 |
| 64 | 8  | 0 | -4.096000 | 2.684010  | -3.482806 |
| 65 | 8  | 0 | 5.301100  | 3.406482  | 3.001655  |
| 66 | 8  | 0 | 1.036186  | 5.079981  | 3.329316  |
| 67 | 8  | 0 | -3.997736 | 4.546948  | -1.690611 |
| 68 | 8  | 0 | -0.981477 | 4.955024  | -1.275490 |
| 69 | 8  | 0 | -1.251114 | 3.901996  | 3.419281  |
| 70 | 8  | 0 | -2.274127 | 1.626664  | 3.901441  |
| 71 | 8  | 0 | -7.153004 | 0.492486  | 3.303238  |
| 72 | 8  | 0 | -6.343519 | 2.881852  | 2.336110  |
| 73 | 8  | 0 | 4.661626  | 2.575212  | -3.215351 |
| 74 | 8  | 0 | -3.771543 | 3.527909  | 2.676970  |
| 75 | 8  | 0 | -2.131944 | 4.504897  | -3.639052 |
| 76 | 8  | 0 | -0.469292 | 5.321085  | 1.275578  |
| 77 | 8  | 0 | -5.207087 | 4.549964  | 0.682546  |
| 78 | 8  | 0 | 5.949262  | 1.310143  | -1.370289 |
| 79 | 8  | 0 | 2.241402  | 2.288901  | -4.345290 |
| 80 | 1  | 0 | 7.654161  | -2.777399 | 0.483943  |
| 81 | 1  | 0 | 6.908853  | -1.219774 | 3.971628  |
| 82 | 1  | 0 | 8.157686  | 0.946476  | -0.243894 |
| 83 | 1  | 0 | 7.491920  | 2.100541  | 3.353576  |
| 84 | 1  | 0 | 7.209372  | 2.778267  | -3.073588 |
| 85 | 1  | 0 | 5.819577  | 5.514792  | 4.104142  |
| 86 | 1  | 0 | 2.691773  | 6.927076  | 2.670148  |
| 87 | 1  | 0 | 3.716718  | 4.433789  | -4.429173 |
| 88 | 1  | 0 | -0.122698 | 6.033042  | -3.431683 |
| 89 | 1  | 0 | -0.845502 | 7.254578  | -0.261652 |
| 90 | 1  | 0 | 5.160658  | -5.322248 | 0.791817  |
| 91 | 1  | 0 | 4.494576  | -3.681108 | 5.107467  |
| 92 | 1  | 0 | 1.600397  | -6.084213 | 0.888984  |
| 93 | 1  | 0 | 0.854624  | -4.899185 | 4.132307  |
| 94 | 1  | 0 | -2.903440 | -7.211900 | 0.225024  |
| 95 | 1  | 0 | -3.392936 | -5.735023 | 3.627549  |
| 96 | 1  | 0 | -6.854163 | -4.846139 | -1.256737 |
| 97 | 1  | 0 | -7.576266 | -3.599065 | 2.526340  |

|     |    |   |           |           |           |
|-----|----|---|-----------|-----------|-----------|
| 98  | 1  | 0 | -7.099539 | -0.353998 | -4.837210 |
| 99  | 1  | 0 | -8.744360 | 2.295837  | 2.657361  |
| 100 | 1  | 0 | -4.498352 | 5.142641  | -4.142756 |
| 101 | 1  | 0 | -4.982436 | 6.610421  | -0.741888 |
| 102 | 1  | 0 | 6.364357  | 0.785880  | -3.800445 |
| 103 | 1  | 0 | 6.603324  | -2.278564 | -1.604913 |
| 104 | 1  | 0 | 4.157475  | 2.553544  | -5.752475 |
| 105 | 1  | 0 | 0.116443  | 2.997634  | -5.589778 |
| 106 | 1  | 0 | -3.537228 | 2.473985  | -5.921959 |
| 107 | 1  | 0 | -0.728610 | -0.545497 | -5.558162 |
| 108 | 1  | 0 | -5.453453 | -1.427748 | -6.211686 |
| 109 | 1  | 0 | -5.051407 | -4.041629 | -4.140335 |
| 110 | 1  | 0 | 1.678429  | -5.344370 | -1.435013 |
| 111 | 1  | 0 | -2.654934 | -6.079333 | -1.949755 |
| 112 | 1  | 0 | -0.535244 | -3.493769 | -3.436886 |
| 113 | 1  | 0 | -4.175042 | -4.240126 | 5.344341  |
| 114 | 1  | 0 | 0.547869  | -3.295400 | 5.843560  |
| 115 | 1  | 0 | -6.220849 | -1.176382 | 4.941070  |
| 116 | 1  | 0 | -2.731073 | -0.317107 | 5.440008  |
| 117 | 1  | 0 | 5.584503  | -0.332413 | 5.752948  |
| 118 | 1  | 0 | -7.440163 | 2.656073  | 4.627082  |
| 119 | 1  | 0 | -5.641291 | 5.204487  | 3.107887  |
| 120 | 1  | 0 | -1.173424 | 6.400795  | 3.510278  |
| 121 | 1  | 0 | 1.937625  | 6.575406  | 5.059163  |
| 122 | 1  | 0 | 5.155832  | 3.686437  | 5.570773  |
| 123 | 1  | 0 | -3.104042 | 3.605000  | 5.126213  |
| 124 | 14 | 0 | -1.689162 | -2.315618 | 2.850898  |
| 125 | 79 | 0 | 3.258917  | -1.806386 | -2.774412 |
| 126 | 79 | 0 | 3.174544  | -0.600866 | -0.136060 |
| 127 | 79 | 0 | 1.013493  | -0.553878 | -1.576750 |

-----

Zero-point correction= 0.308911 (Hartree/Particle)  
Thermal correction to Energy= 0.387923  
Thermal correction to Enthalpy= 0.388867  
Thermal correction to Gibbs Free Energy= 0.200565  
Sum of electronic and zero-point Energies= -13739.988721  
Sum of electronic and thermal Energies= -13739.909709  
Sum of electronic and thermal Enthalpies= -13739.908765  
Sum of electronic and thermal Free Energies= -13740.097067

M06-L/def2-TZVP//b3lyp/6-31G(d,p)-LANL2DZ Single point energy: -13743.237167

**Fig. 1 (e)**

**Charge: 0 multiplicity: 2**

-----

| Center<br>Number | Atomic<br>Number | Atomic<br>Type | Coordinates (Angstroms) |          |           |
|------------------|------------------|----------------|-------------------------|----------|-----------|
|                  |                  |                | X                       | Y        | Z         |
| 1                | 14               | 0              | 5.115207                | 4.745767 | 1.582308  |
| 2                | 14               | 0              | 7.154767                | 2.580917 | 2.514993  |
| 3                | 14               | 0              | 5.201141                | 4.587478 | -1.534682 |
| 4                | 14               | 0              | 7.184098                | 2.377185 | -2.262767 |
| 5                | 8                | 0              | 5.848404                | 3.366056 | 1.973519  |
| 6                | 8                | 0              | 7.275981                | 1.292960 | 1.518219  |
| 7                | 8                | 0              | 5.254521                | 5.136189 | 0.002969  |
| 8                | 8                | 0              | 5.850865                | 3.115258 | -1.688859 |
| 9                | 8                | 0              | 6.922858                | 0.793631 | -1.971661 |
| 10               | 14               | 0              | -1.217009               | 1.953156 | 3.723032  |
| 11               | 14               | 0              | -4.288812               | 2.057597 | 3.688162  |

|    |    |   |           |           |           |
|----|----|---|-----------|-----------|-----------|
| 12 | 14 | 0 | -5.035050 | 3.915172  | -1.707662 |
| 13 | 14 | 0 | -2.573057 | 5.638783  | -2.578384 |
| 14 | 14 | 0 | 2.238828  | 5.025795  | -2.447138 |
| 15 | 14 | 0 | -1.224445 | 1.334187  | -3.887561 |
| 16 | 14 | 0 | -4.309635 | 1.791786  | -3.830831 |
| 17 | 14 | 0 | -5.028155 | 4.077302  | 1.447154  |
| 18 | 14 | 0 | -2.632009 | 5.829493  | 2.210798  |
| 19 | 14 | 0 | 2.134621  | 5.120069  | 2.317263  |
| 20 | 14 | 0 | -0.533703 | 3.788950  | 1.264407  |
| 21 | 8  | 0 | -2.762210 | 1.949924  | 4.258004  |
| 22 | 8  | 0 | -4.049309 | 5.163072  | -2.070821 |
| 23 | 8  | 0 | 1.107607  | 3.897783  | -2.085554 |
| 24 | 8  | 0 | -1.429620 | 4.496019  | -2.370222 |
| 25 | 8  | 0 | -4.490695 | 2.533941  | -2.391666 |
| 26 | 8  | 0 | -0.760979 | 1.958090  | -2.441139 |
| 27 | 8  | 0 | 3.677316  | 4.400486  | -2.045398 |
| 28 | 8  | 0 | -5.059474 | 3.643632  | -0.112287 |
| 29 | 8  | 0 | -0.618823 | 3.129347  | -0.205160 |
| 30 | 8  | 0 | -2.838718 | 1.078888  | -3.930916 |
| 31 | 8  | 0 | -4.139048 | 5.430594  | 1.694731  |
| 32 | 8  | 0 | 0.995384  | 4.207082  | 1.584302  |
| 33 | 8  | 0 | -1.462726 | 5.125142  | 1.296999  |
| 34 | 8  | 0 | -4.346218 | 2.838108  | 2.261541  |
| 35 | 8  | 0 | -1.130289 | 2.709171  | 2.297196  |
| 36 | 8  | 0 | 3.575386  | 4.449223  | 1.993266  |
| 37 | 14 | 0 | 7.663195  | -0.280994 | 1.563810  |
| 38 | 14 | 0 | 7.664378  | -0.569626 | -1.489466 |
| 39 | 8  | 0 | 7.491383  | -0.922242 | 0.087289  |
| 40 | 14 | 0 | 1.122429  | -3.325052 | 3.970586  |
| 41 | 14 | 0 | -0.789344 | -0.966434 | 4.352680  |
| 42 | 14 | 0 | -5.546526 | -0.652222 | 4.372373  |
| 43 | 14 | 0 | 4.388844  | -4.124335 | -4.293173 |
| 44 | 14 | 0 | -3.387760 | -2.776818 | 3.833658  |
| 45 | 14 | 0 | 6.946839  | -2.356922 | -3.800639 |
| 46 | 14 | 0 | -2.833478 | -5.034148 | -1.482981 |
| 47 | 14 | 0 | 0.214695  | -5.292520 | -1.399119 |
| 48 | 14 | 0 | 1.411538  | -3.768631 | -3.773240 |
| 49 | 14 | 0 | -0.706433 | -1.618037 | -4.436354 |
| 50 | 14 | 0 | -5.612370 | -0.899659 | -4.498111 |
| 51 | 14 | 0 | 4.127825  | -3.709487 | 4.569542  |
| 52 | 14 | 0 | -3.449476 | -3.006964 | -3.703413 |
| 53 | 14 | 0 | 6.630071  | -2.079825 | 3.859945  |
| 54 | 14 | 0 | -2.845518 | -4.808499 | 1.699980  |
| 55 | 14 | 0 | 0.213285  | -5.123594 | 1.731853  |
| 56 | 8  | 0 | 0.445629  | -1.864623 | 3.836053  |
| 57 | 8  | 0 | -0.666664 | 0.438512  | 3.552731  |
| 58 | 8  | 0 | -4.908027 | 0.563216  | 3.478651  |
| 59 | 8  | 0 | -4.806904 | -2.089312 | 4.152593  |
| 60 | 8  | 0 | 5.476749  | -2.930641 | -4.138030 |
| 61 | 8  | 0 | -2.207588 | -1.694945 | 4.027347  |
| 62 | 8  | 0 | -1.298922 | -5.205746 | -2.026918 |
| 63 | 8  | 0 | 1.139730  | -4.043224 | 2.507926  |
| 64 | 8  | 0 | -3.402451 | -3.360133 | 2.283717  |
| 65 | 8  | 0 | 6.979773  | -1.816902 | -2.259241 |
| 66 | 8  | 0 | 2.986130  | -3.442473 | -3.846328 |
| 67 | 8  | 0 | -2.854967 | -4.629276 | 0.094142  |
| 68 | 8  | 0 | 0.216939  | -4.799103 | 0.147110  |
| 69 | 8  | 0 | 0.659878  | -2.361780 | -4.018981 |
| 70 | 8  | 0 | -0.455736 | -0.073076 | -4.005947 |
| 71 | 8  | 0 | -5.470529 | 0.666138  | -4.015980 |

|     |    |   |           |           |           |
|-----|----|---|-----------|-----------|-----------|
| 72  | 8  | 0 | -4.616978 | -1.877796 | -3.649424 |
| 73  | 8  | 0 | 5.232475  | -2.892775 | 3.700778  |
| 74  | 8  | 0 | -1.978532 | -2.307915 | -3.690247 |
| 75  | 8  | 0 | -1.340187 | -5.085118 | 2.293118  |
| 76  | 8  | 0 | 1.187239  | -4.342888 | -2.267230 |
| 77  | 8  | 0 | -3.634500 | -3.928963 | -2.364808 |
| 78  | 8  | 0 | 6.691175  | -1.073748 | 2.584089  |
| 79  | 8  | 0 | 2.653052  | -3.049140 | 4.401521  |
| 80  | 1  | 0 | 8.337625  | 3.402075  | 2.329277  |
| 81  | 1  | 0 | 8.323934  | 2.940105  | -1.534919 |
| 82  | 1  | 0 | 9.027265  | -0.350846 | 2.028473  |
| 83  | 1  | 0 | 9.075741  | -0.392625 | -1.807251 |
| 84  | 1  | 0 | 7.776914  | -2.976152 | 3.979462  |
| 85  | 1  | 0 | 7.850253  | -3.475127 | -3.810634 |
| 86  | 1  | 0 | 4.657971  | -5.350174 | -3.453442 |
| 87  | 1  | 0 | 4.260197  | -5.071029 | 4.124895  |
| 88  | 1  | 0 | 0.793228  | -6.417127 | 2.012638  |
| 89  | 1  | 0 | 0.719672  | -6.653296 | -1.451728 |
| 90  | 1  | 0 | 5.723573  | 5.842372  | 2.313783  |
| 91  | 1  | 0 | 5.933811  | 5.551693  | -2.337328 |
| 92  | 1  | 0 | 2.178363  | 6.486093  | 1.782161  |
| 93  | 1  | 0 | 2.091444  | 6.306004  | -1.744814 |
| 94  | 1  | 0 | -2.452483 | 7.220476  | 1.895920  |
| 95  | 1  | 0 | -2.236081 | 6.818030  | -1.817466 |
| 96  | 1  | 0 | -6.379727 | 4.396190  | 1.869247  |
| 97  | 1  | 0 | -6.347506 | 4.319669  | -2.178137 |
| 98  | 1  | 0 | -6.839067 | -0.968677 | 3.885788  |
| 99  | 1  | 0 | -6.970408 | -1.297955 | -4.224059 |
| 100 | 1  | 0 | -3.699319 | -5.919011 | 2.125917  |
| 101 | 1  | 0 | -3.479037 | -6.313224 | -1.582712 |
| 102 | 1  | 0 | 6.655208  | -1.321254 | 5.081757  |
| 103 | 1  | 0 | 6.997396  | 2.266689  | 3.951358  |
| 104 | 1  | 0 | 4.310690  | -3.661616 | 5.993513  |
| 105 | 1  | 0 | 0.407077  | -4.163232 | 4.962080  |
| 106 | 1  | 0 | -3.281645 | -3.878431 | 4.747313  |
| 107 | 1  | 0 | -0.719527 | -0.802248 | 5.800816  |
| 108 | 1  | 0 | -5.544723 | -0.305652 | 5.792805  |
| 109 | 1  | 0 | -5.024834 | 2.820574  | 4.678898  |
| 110 | 1  | 0 | 1.927864  | 5.085851  | 3.764833  |
| 111 | 1  | 0 | -2.477057 | 5.495941  | 3.656461  |
| 112 | 1  | 0 | -0.424565 | 2.651362  | 4.698109  |
| 113 | 1  | 0 | -2.588655 | 5.883273  | -4.007384 |
| 114 | 1  | 0 | 2.214141  | 5.280818  | -3.872864 |
| 115 | 1  | 0 | -4.404487 | 2.777015  | -4.895194 |
| 116 | 1  | 0 | -0.820129 | 2.217171  | -4.964552 |
| 117 | 1  | 0 | 7.397963  | 2.586967  | -3.710297 |
| 118 | 1  | 0 | -5.328136 | -1.009394 | -5.935839 |
| 119 | 1  | 0 | -3.599336 | -3.838405 | -4.912916 |
| 120 | 1  | 0 | 0.958095  | -4.717790 | -4.807562 |
| 121 | 1  | 0 | 4.288446  | -4.321749 | -5.735017 |
| 122 | 1  | 0 | 7.288825  | -1.312757 | -4.781913 |
| 123 | 1  | 0 | -0.904907 | -1.628076 | -5.874215 |
| 124 | 14 | 0 | -0.398022 | 3.404521  | -1.778140 |
| 125 | 79 | 0 | -1.893035 | 0.431689  | -0.713743 |
| 126 | 79 | 0 | -2.855603 | -1.477160 | 0.706927  |
| 127 | 79 | 0 | 0.049973  | -1.392619 | 0.175580  |

-----  
Zero-point correction= 0.309152 (Hartree/Particle)  
Thermal correction to Energy= 0.387861  
Thermal correction to Enthalpy= 0.388806

Thermal correction to Gibbs Free Energy= 0.204096  
 Sum of electronic and zero-point Energies= -13739.988696  
 Sum of electronic and thermal Energies= -13739.909986  
 Sum of electronic and thermal Enthalpies= -13739.909042  
 Sum of electronic and thermal Free Energies= -13740.093751  
 M06-L/def2-TZVP//b3lyp/6-31G(d,p)-LANL2DZ Single point energy: -13743.239158

**Fig. 1 (f)**

**Charge: 0 multiplicity: 1**

| Center<br>Number | Atomic<br>Number | Atomic<br>Type | Coordinates (Angstroms) |           |           |
|------------------|------------------|----------------|-------------------------|-----------|-----------|
|                  |                  |                | X                       | Y         | Z         |
| 1                | 14               | 0              | 4.061853                | 5.345950  | 1.327701  |
| 2                | 14               | 0              | 6.346832                | 3.488713  | 2.343933  |
| 3                | 14               | 0              | 4.153204                | 5.041804  | -1.782842 |
| 4                | 14               | 0              | 6.378498                | 3.049861  | -2.424995 |
| 5                | 8                | 0              | 4.944504                | 4.078773  | 1.785367  |
| 6                | 8                | 0              | 6.602154                | 2.172727  | 1.407363  |
| 7                | 8                | 0              | 4.140127                | 5.661277  | -0.272490 |
| 8                | 8                | 0              | 4.962909                | 3.646245  | -1.875520 |
| 9                | 8                | 0              | 6.297423                | 1.461255  | -2.052442 |
| 10               | 14               | 0              | -1.885764               | 1.943374  | 3.666922  |
| 11               | 14               | 0              | -4.960466               | 1.685824  | 3.658508  |
| 12               | 14               | 0              | -5.950843               | 3.190601  | -1.799233 |
| 13               | 14               | 0              | -3.726032               | 5.128592  | -2.793764 |
| 14               | 14               | 0              | 1.166599                | 5.111735  | -2.685197 |
| 15               | 14               | 0              | -1.850524               | 0.966316  | -3.885721 |
| 16               | 14               | 0              | -4.985448               | 1.067607  | -3.816212 |
| 17               | 14               | 0              | -5.937113               | 3.503412  | 1.340790  |
| 18               | 14               | 0              | -3.771892               | 5.553273  | 1.990850  |
| 19               | 14               | 0              | 1.064341                | 5.413059  | 2.074687  |
| 20               | 14               | 0              | -1.441521               | 3.715379  | 1.115369  |
| 21               | 8                | 0              | -3.410660               | 1.746925  | 4.199506  |
| 22               | 8                | 0              | -5.140071               | 4.533210  | -2.246192 |
| 23               | 8                | 0              | 0.121130                | 3.931855  | -2.229467 |
| 24               | 8                | 0              | -2.512250               | 4.046059  | -2.545335 |
| 25               | 8                | 0              | -5.254095               | 1.843956  | -2.413705 |
| 26               | 8                | 0              | -1.301078               | 1.690714  | -2.496080 |
| 27               | 8                | 0              | 2.651949                | 4.636665  | -2.258795 |
| 28               | 8                | 0              | -5.897271               | 2.989169  | -0.194082 |
| 29               | 8                | 0              | -1.449380               | 2.953324  | -0.318226 |
| 30               | 8                | 0              | -3.421167               | 0.554999  | -3.818546 |
| 31               | 8                | 0              | -5.229516               | 4.966793  | 1.522110  |
| 32               | 8                | 0              | 0.017101                | 4.340673  | 1.401518  |
| 33               | 8                | 0              | -2.556302               | 4.891078  | 1.095085  |
| 34               | 8                | 0              | -5.087182               | 2.395530  | 2.199461  |
| 35               | 8                | 0              | -1.853248               | 2.572414  | 2.181597  |
| 36               | 8                | 0              | 2.561569                | 4.881475  | 1.755335  |
| 37               | 14               | 0              | 7.182896                | 0.663882  | 1.523416  |
| 38               | 14               | 0              | 7.202412                | 0.224994  | -1.509851 |
| 39               | 8                | 0              | 7.067660                | -0.069010 | 0.083156  |
| 40               | 14               | 0              | 1.066689                | -3.015300 | 4.147326  |
| 41               | 14               | 0              | -1.137806               | -0.887456 | 4.449224  |
| 42               | 14               | 0              | -5.888835               | -1.106890 | 4.494351  |
| 43               | 14               | 0              | 4.376000                | -3.832284 | -4.103306 |
| 44               | 14               | 0              | -3.501858               | -3.018445 | 4.014480  |
| 45               | 14               | 0              | 6.694164                | -1.745416 | -3.720984 |



|     |    |   |           |           |           |
|-----|----|---|-----------|-----------|-----------|
| 46  | 14 | 0 | -2.724016 | -5.434353 | -1.168306 |
| 47  | 14 | 0 | 0.324422  | -5.350785 | -1.108049 |
| 48  | 14 | 0 | 1.358461  | -3.790597 | -3.586897 |
| 49  | 14 | 0 | -1.013327 | -1.951924 | -4.317661 |
| 50  | 14 | 0 | -5.964387 | -1.803463 | -4.361245 |
| 51  | 14 | 0 | 4.107324  | -3.004171 | 4.733691  |
| 52  | 14 | 0 | -3.565900 | -3.609160 | -3.489131 |
| 53  | 14 | 0 | 6.386743  | -1.123692 | 3.915411  |
| 54  | 14 | 0 | -2.755877 | -5.039973 | 1.989911  |
| 55  | 14 | 0 | 0.328525  | -5.024269 | 2.017633  |
| 56  | 8  | 0 | 0.227048  | -1.615515 | 3.886372  |
| 57  | 8  | 0 | -1.137211 | 0.481903  | 3.559524  |
| 58  | 8  | 0 | -5.397421 | 0.122224  | 3.519214  |
| 59  | 8  | 0 | -4.958094 | -2.434791 | 4.342080  |
| 60  | 8  | 0 | 5.282588  | -2.497432 | -4.001870 |
| 61  | 8  | 0 | -2.414129 | -1.807510 | 4.112302  |
| 62  | 8  | 0 | -1.173567 | -5.465970 | -1.734078 |
| 63  | 8  | 0 | 1.110651  | -3.770466 | 2.701851  |
| 64  | 8  | 0 | -3.462672 | -3.663435 | 2.513482  |
| 65  | 8  | 0 | 6.654874  | -1.131947 | -2.208210 |
| 66  | 8  | 0 | 2.890990  | -3.334831 | -3.621987 |
| 67  | 8  | 0 | -2.735808 | -4.922441 | 0.371373  |
| 68  | 8  | 0 | 0.322854  | -4.756748 | 0.406484  |
| 69  | 8  | 0 | 0.458592  | -2.485836 | -3.894083 |
| 70  | 8  | 0 | -0.955499 | -0.377891 | -3.919476 |
| 71  | 8  | 0 | -5.977384 | -0.213451 | -3.944893 |
| 72  | 8  | 0 | -4.824683 | -2.588726 | -3.477939 |
| 73  | 8  | 0 | 5.078314  | -2.095215 | 3.807834  |
| 74  | 8  | 0 | -2.153927 | -2.772763 | -3.496508 |
| 75  | 8  | 0 | -1.209298 | -5.119463 | 2.568360  |
| 76  | 8  | 0 | 1.127542  | -4.207409 | -1.986546 |
| 77  | 8  | 0 | -3.634763 | -4.463862 | -2.096249 |
| 78  | 8  | 0 | 6.307790  | -0.190451 | 2.587136  |
| 79  | 8  | 0 | 2.549561  | -2.533887 | 4.527251  |
| 80  | 1  | 0 | 7.421989  | 4.428995  | 2.101773  |
| 81  | 1  | 0 | 7.443133  | 3.776654  | -1.734847 |
| 82  | 1  | 0 | 8.545795  | 0.772206  | 1.977330  |
| 83  | 1  | 0 | 8.579495  | 0.545342  | -1.852070 |
| 84  | 1  | 0 | 7.622060  | -1.880850 | 4.067768  |
| 85  | 1  | 0 | 7.714167  | -2.755303 | -3.688955 |
| 86  | 1  | 0 | 4.765857  | -4.970738 | -3.205918 |
| 87  | 1  | 0 | 4.376288  | -4.362847 | 4.353580  |
| 88  | 1  | 0 | 1.080623  | -6.208810 | 2.347312  |
| 89  | 1  | 0 | 1.017772  | -6.624197 | -1.100486 |
| 90  | 1  | 0 | 4.539538  | 6.542942  | 1.995368  |
| 91  | 1  | 0 | 4.759002  | 6.047506  | -2.638011 |
| 92  | 1  | 0 | 0.940632  | 6.740230  | 1.471373  |
| 93  | 1  | 0 | 0.857693  | 6.375753  | -2.041432 |
| 94  | 1  | 0 | -3.743753 | 6.932663  | 1.599339  |
| 95  | 1  | 0 | -3.500408 | 6.373735  | -2.091977 |
| 96  | 1  | 0 | -7.312453 | 3.670604  | 1.753373  |
| 97  | 1  | 0 | -7.291898 | 3.396847  | -2.285557 |
| 98  | 1  | 0 | -7.128807 | -1.604006 | 4.034624  |
| 99  | 1  | 0 | -7.261499 | -2.349973 | -4.047553 |
| 100 | 1  | 0 | -3.439146 | -6.234701 | 2.484890  |
| 101 | 1  | 0 | -3.191755 | -6.784474 | -1.201705 |
| 102 | 1  | 0 | 6.319446  | -0.315673 | 5.099950  |
| 103 | 1  | 0 | 6.232453  | 3.226862  | 3.791830  |
| 104 | 1  | 0 | 4.270437  | -2.865863 | 6.150410  |
| 105 | 1  | 0 | 0.447541  | -3.871361 | 5.187098  |

|     |    |   |           |           |           |
|-----|----|---|-----------|-----------|-----------|
| 106 | 1  | 0 | -3.250137 | -4.031173 | 4.998705  |
| 107 | 1  | 0 | -1.061595 | -0.627642 | 5.872726  |
| 108 | 1  | 0 | -5.911613 | -0.699935 | 5.892788  |
| 109 | 1  | 0 | -5.767858 | 2.406230  | 4.621818  |
| 110 | 1  | 0 | 0.866211  | 5.420849  | 3.522721  |
| 111 | 1  | 0 | -3.556877 | 5.306972  | 3.442252  |
| 112 | 1  | 0 | -1.179467 | 2.777470  | 4.599418  |
| 113 | 1  | 0 | -3.751724 | 5.296404  | -4.229726 |
| 114 | 1  | 0 | 1.089140  | 5.267238  | -4.118030 |
| 115 | 1  | 0 | -5.194971 | 1.958637  | -4.944866 |
| 116 | 1  | 0 | -1.570077 | 1.819106  | -5.025685 |
| 117 | 1  | 0 | 6.554042  | 3.209692  | -3.880188 |
| 118 | 1  | 0 | -5.673087 | -1.956936 | -5.789107 |
| 119 | 1  | 0 | -3.619127 | -4.509777 | -4.647911 |
| 120 | 1  | 0 | 1.010578  | -4.843744 | -4.549138 |
| 121 | 1  | 0 | 4.266684  | -4.107565 | -5.530908 |
| 122 | 1  | 0 | 6.897938  | -0.724537 | -4.758633 |
| 123 | 1  | 0 | -1.207565 | -2.050148 | -5.745316 |
| 124 | 14 | 0 | -1.284889 | 3.233822  | -1.902893 |
| 125 | 79 | 0 | -0.290108 | 0.288135  | -0.855755 |
| 126 | 79 | 0 | 0.893550  | -2.118658 | -0.699014 |
| 127 | 79 | 0 | 0.323337  | -0.736749 | 1.522142  |

-----  
Zero-point correction= 0.309028 (Hartree/Particle)  
Thermal correction to Energy= 0.387205  
Thermal correction to Enthalpy= 0.388149  
Thermal correction to Gibbs Free Energy= 0.207526  
Sum of electronic and zero-point Energies= -13739.827432  
Sum of electronic and thermal Energies= -13739.749255  
Sum of electronic and thermal Enthalpies= -13739.748311  
Sum of electronic and thermal Free Energies= -13739.928934  
M06-L/def2-TZVP//b3lyp/6-31G(d,p)-LANL2DZ Single point energy: -13743.078156

### Au<sub>3</sub>

Charge: 0 multiplicity: 2

-----

| Center<br>Number | Atomic<br>Number | Atomic<br>Type | Coordinates (Angstroms) |           |           |
|------------------|------------------|----------------|-------------------------|-----------|-----------|
|                  |                  |                | X                       | Y         | Z         |
| 1                | 79               | 0              | 0.000000                | 0.000000  | 0.588648  |
| 2                | 79               | 0              | 0.000000                | -2.487379 | -0.294324 |
| 3                | 79               | 0              | 0.000000                | 2.487379  | -0.294324 |

-----

Zero-point correction= 0.000634 (Hartree/Particle)  
Thermal correction to Energy= 0.005729  
Thermal correction to Enthalpy= 0.006673  
Thermal correction to Gibbs Free Energy= -0.036548  
Sum of electronic and zero-point Energies= -406.419876  
Sum of electronic and thermal Energies= -406.414780  
Sum of electronic and thermal Enthalpies= -406.413836  
Sum of electronic and thermal Free Energies= -406.457057  
M06-L/def2-TZVP//b3lyp/6-31G(d,p)-LANL2DZ Single point energy: -407.4954317

### Au<sub>3</sub><sup>+</sup>

Charge: 0 multiplicity: 1

-----

| Center | Atomic | Atomic | Coordinates (Angstroms) |  |  |
|--------|--------|--------|-------------------------|--|--|
|--------|--------|--------|-------------------------|--|--|

| Number | Number | Type | X         | Y         | Z        |
|--------|--------|------|-----------|-----------|----------|
| 1      | 79     | 0    | 1.352217  | -0.780661 | 0.000000 |
| 2      | 79     | 0    | 0.000000  | 1.561367  | 0.000000 |
| 3      | 79     | 0    | -1.352217 | -0.780706 | 0.000000 |

Zero-point correction= 0.000819 (Hartree/Particle)  
 Thermal correction to Energy= 0.005748  
 Thermal correction to Enthalpy= 0.006692  
 Thermal correction to Gibbs Free Energy= -0.034347  
 Sum of electronic and zero-point Energies= -406.152748  
 Sum of electronic and thermal Energies= -406.147819  
 Sum of electronic and thermal Enthalpies= -406.146875  
 Sum of electronic and thermal Free Energies= -406.187914

M06-L/def2-TZVP//b3lyp/6-31G(d,p)-LANL2DZ Single point energy: -407.277437

## Ethanol

Charge: 0 multiplicity: 1

| Center Number | Atomic Number | Atomic Type | Coordinates (Angstroms) |           |           |
|---------------|---------------|-------------|-------------------------|-----------|-----------|
|               |               |             | X                       | Y         | Z         |
| 1             | 6             | 0           | 1.178597                | -0.401223 | 0.000000  |
| 2             | 1             | 0           | 2.122545                | 0.154822  | 0.000000  |
| 3             | 1             | 0           | 1.152194                | -1.042007 | 0.887000  |
| 4             | 1             | 0           | 1.152194                | -1.042007 | -0.887000 |
| 5             | 6             | 0           | 0.000000                | 0.556692  | 0.000000  |
| 6             | 1             | 0           | 0.037027                | 1.203759  | 0.889504  |
| 7             | 1             | 0           | 0.037027                | 1.203759  | -0.889504 |
| 8             | 8             | 0           | -1.201119               | -0.222578 | 0.000000  |
| 9             | 1             | 0           | -1.963616               | 0.369491  | 0.000000  |

Zero-point correction= 0.079828 (Hartree/Particle)  
 Thermal correction to Energy= 0.084142  
 Thermal correction to Enthalpy= 0.085086  
 Thermal correction to Gibbs Free Energy= 0.054413  
 Sum of electronic and zero-point Energies= -154.978148  
 Sum of electronic and thermal Energies= -154.973835  
 Sum of electronic and thermal Enthalpies= -154.972891  
 Sum of electronic and thermal Free Energies= -155.003563

M06-L/def2-TZVP//b3lyp/6-31G(d,p)-LANL2DZ Single point energy: -155.0748155

## O<sub>2</sub>

Charge: 0 multiplicity: 3

| Center Number | Atomic Number | Atomic Type | Coordinates (Angstroms) |          |           |
|---------------|---------------|-------------|-------------------------|----------|-----------|
|               |               |             | X                       | Y        | Z         |
| 1             | 8             | 0           | 0.000000                | 0.000000 | 0.608011  |
| 2             | 8             | 0           | 0.000000                | 0.000000 | -0.608011 |

Zero-point correction= 0.003779 (Hartree/Particle)  
 Thermal correction to Energy= 0.006142  
 Thermal correction to Enthalpy= 0.007087  
 Thermal correction to Gibbs Free Energy= -0.016199  
 Sum of electronic and zero-point Energies= -150.316261

Sum of electronic and thermal Energies= -150.313898  
 Sum of electronic and thermal Enthalpies= -150.312954  
 Sum of electronic and thermal Free Energies= -150.336240  
 M06-L/def2-TZVP//b3lyp/6-31G(d,p)-LANL2DZ Single point energy: -150.369368

## H<sub>2</sub>

Charge: 0 multiplicity: 1

| Center Number | Atomic Number | Atomic Type | Coordinates (Angstroms) |          |           |
|---------------|---------------|-------------|-------------------------|----------|-----------|
|               |               |             | X                       | Y        | Z         |
| 1             | 1             | 0           | 0.000000                | 0.000000 | 0.371394  |
| 2             | 1             | 0           | 0.000000                | 0.000000 | -0.371394 |

Zero-point correction= 0.010145 (Hartree/Particle)  
 Thermal correction to Energy= 0.012505  
 Thermal correction to Enthalpy= 0.013450  
 Thermal correction to Gibbs Free Energy= -0.001342  
 Sum of electronic and zero-point Energies= -1.165337  
 Sum of electronic and thermal Energies= -1.162977  
 Sum of electronic and thermal Enthalpies= -1.162033  
 Sum of electronic and thermal Free Energies= -1.176825

M06-L/def2-TZVP//b3lyp/6-31G(d,p)-LANL2DZ Single point energy: -1.1717101

## Au<sub>3</sub><sup>+</sup>-S1

Charge: 1 multiplicity: 1

| Center Number | Atomic Number | Atomic Type | Coordinates (Angstroms) |          |           |
|---------------|---------------|-------------|-------------------------|----------|-----------|
|               |               |             | X                       | Y        | Z         |
| 1             | 14            | 0           | 4.061853                | 5.345950 | 1.327701  |
| 2             | 14            | 0           | 6.346832                | 3.488713 | 2.343933  |
| 3             | 14            | 0           | 4.153204                | 5.041804 | -1.782842 |
| 4             | 14            | 0           | 6.378498                | 3.049861 | -2.424995 |
| 5             | 8             | 0           | 4.944504                | 4.078773 | 1.785367  |
| 6             | 8             | 0           | 6.602154                | 2.172727 | 1.407363  |
| 7             | 8             | 0           | 4.140127                | 5.661277 | -0.272490 |
| 8             | 8             | 0           | 4.962909                | 3.646245 | -1.875520 |
| 9             | 8             | 0           | 6.297423                | 1.461255 | -2.052442 |
| 10            | 14            | 0           | -1.885764               | 1.943374 | 3.666922  |
| 11            | 14            | 0           | -4.960466               | 1.685824 | 3.658508  |
| 12            | 14            | 0           | -5.950843               | 3.190601 | -1.799233 |
| 13            | 14            | 0           | -3.726032               | 5.128592 | -2.793764 |
| 14            | 14            | 0           | 1.166599                | 5.111735 | -2.685197 |
| 15            | 14            | 0           | -1.850524               | 0.966316 | -3.885721 |
| 16            | 14            | 0           | -4.985448               | 1.067607 | -3.816212 |
| 17            | 14            | 0           | -5.937113               | 3.503412 | 1.340790  |
| 18            | 14            | 0           | -3.771892               | 5.553273 | 1.990850  |
| 19            | 14            | 0           | 1.064341                | 5.413059 | 2.074687  |
| 20            | 14            | 0           | -1.441521               | 3.715379 | 1.115369  |
| 21            | 8             | 0           | -3.410660               | 1.746925 | 4.199506  |
| 22            | 8             | 0           | -5.140071               | 4.533210 | -2.246192 |
| 23            | 8             | 0           | 0.121130                | 3.931855 | -2.229467 |
| 24            | 8             | 0           | -2.512250               | 4.046059 | -2.545335 |
| 25            | 8             | 0           | -5.254095               | 1.843956 | -2.413705 |
| 26            | 8             | 0           | -1.301078               | 1.690714 | -2.496080 |
| 27            | 8             | 0           | 2.651949                | 4.636665 | -2.258795 |

|    |    |   |           |           |           |
|----|----|---|-----------|-----------|-----------|
| 28 | 8  | 0 | -5.897271 | 2.989169  | -0.194082 |
| 29 | 8  | 0 | -1.449380 | 2.953324  | -0.318226 |
| 30 | 8  | 0 | -3.421167 | 0.554999  | -3.818546 |
| 31 | 8  | 0 | -5.229516 | 4.966793  | 1.522110  |
| 32 | 8  | 0 | 0.017101  | 4.340673  | 1.401518  |
| 33 | 8  | 0 | -2.556302 | 4.891078  | 1.095085  |
| 34 | 8  | 0 | -5.087182 | 2.395530  | 2.199461  |
| 35 | 8  | 0 | -1.853248 | 2.572414  | 2.181597  |
| 36 | 8  | 0 | 2.561569  | 4.881475  | 1.755335  |
| 37 | 14 | 0 | 7.182896  | 0.663882  | 1.523416  |
| 38 | 14 | 0 | 7.202412  | 0.224994  | -1.509851 |
| 39 | 8  | 0 | 7.067660  | -0.069010 | 0.083156  |
| 40 | 14 | 0 | 1.066689  | -3.015300 | 4.147326  |
| 41 | 14 | 0 | -1.137806 | -0.887456 | 4.449224  |
| 42 | 14 | 0 | -5.888835 | -1.106890 | 4.494351  |
| 43 | 14 | 0 | 4.376000  | -3.832284 | -4.103306 |
| 44 | 14 | 0 | -3.501858 | -3.018445 | 4.014480  |
| 45 | 14 | 0 | 6.694164  | -1.745416 | -3.720984 |
| 46 | 14 | 0 | -2.724016 | -5.434353 | -1.168306 |
| 47 | 14 | 0 | 0.324422  | -5.350785 | -1.108049 |
| 48 | 14 | 0 | 1.358461  | -3.790597 | -3.586897 |
| 49 | 14 | 0 | -1.013327 | -1.951924 | -4.317661 |
| 50 | 14 | 0 | -5.964387 | -1.803463 | -4.361245 |
| 51 | 14 | 0 | 4.107324  | -3.004171 | 4.733691  |
| 52 | 14 | 0 | -3.565900 | -3.609160 | -3.489131 |
| 53 | 14 | 0 | 6.386743  | -1.123692 | 3.915411  |
| 54 | 14 | 0 | -2.755877 | -5.039973 | 1.989911  |
| 55 | 14 | 0 | 0.328525  | -5.024269 | 2.017633  |
| 56 | 8  | 0 | 0.227048  | -1.615515 | 3.886372  |
| 57 | 8  | 0 | -1.137211 | 0.481903  | 3.559524  |
| 58 | 8  | 0 | -5.397421 | 0.122224  | 3.519214  |
| 59 | 8  | 0 | -4.958094 | -2.434791 | 4.342080  |
| 60 | 8  | 0 | 5.282588  | -2.497432 | -4.001870 |
| 61 | 8  | 0 | -2.414129 | -1.807510 | 4.112302  |
| 62 | 8  | 0 | -1.173567 | -5.465970 | -1.734078 |
| 63 | 8  | 0 | 1.110651  | -3.770466 | 2.701851  |
| 64 | 8  | 0 | -3.462672 | -3.663435 | 2.513482  |
| 65 | 8  | 0 | 6.654874  | -1.131947 | -2.208210 |
| 66 | 8  | 0 | 2.890990  | -3.334831 | -3.621987 |
| 67 | 8  | 0 | -2.735808 | -4.922441 | 0.371373  |
| 68 | 8  | 0 | 0.322854  | -4.756748 | 0.406484  |
| 69 | 8  | 0 | 0.458592  | -2.485836 | -3.894083 |
| 70 | 8  | 0 | -0.955499 | -0.377891 | -3.919476 |
| 71 | 8  | 0 | -5.977384 | -0.213451 | -3.944893 |
| 72 | 8  | 0 | -4.824683 | -2.588726 | -3.477939 |
| 73 | 8  | 0 | 5.078314  | -2.095215 | 3.807834  |
| 74 | 8  | 0 | -2.153927 | -2.772763 | -3.496508 |
| 75 | 8  | 0 | -1.209298 | -5.119463 | 2.568360  |
| 76 | 8  | 0 | 1.127542  | -4.207409 | -1.986546 |
| 77 | 8  | 0 | -3.634763 | -4.463862 | -2.096249 |
| 78 | 8  | 0 | 6.307790  | -0.190451 | 2.587136  |
| 79 | 8  | 0 | 2.549561  | -2.533887 | 4.527251  |
| 80 | 1  | 0 | 7.421989  | 4.428995  | 2.101773  |
| 81 | 1  | 0 | 7.443133  | 3.776654  | -1.734847 |
| 82 | 1  | 0 | 8.545795  | 0.772206  | 1.977330  |
| 83 | 1  | 0 | 8.579495  | 0.545342  | -1.852070 |
| 84 | 1  | 0 | 7.622060  | -1.880850 | 4.067768  |
| 85 | 1  | 0 | 7.714167  | -2.755303 | -3.688955 |
| 86 | 1  | 0 | 4.765857  | -4.970738 | -3.205918 |
| 87 | 1  | 0 | 4.376288  | -4.362847 | 4.353580  |

|     |    |   |           |           |           |
|-----|----|---|-----------|-----------|-----------|
| 88  | 1  | 0 | 1.080623  | -6.208810 | 2.347312  |
| 89  | 1  | 0 | 1.017772  | -6.624197 | -1.100486 |
| 90  | 1  | 0 | 4.539538  | 6.542942  | 1.995368  |
| 91  | 1  | 0 | 4.759002  | 6.047506  | -2.638011 |
| 92  | 1  | 0 | 0.940632  | 6.740230  | 1.471373  |
| 93  | 1  | 0 | 0.857693  | 6.375753  | -2.041432 |
| 94  | 1  | 0 | -3.743753 | 6.932663  | 1.599339  |
| 95  | 1  | 0 | -3.500408 | 6.373735  | -2.091977 |
| 96  | 1  | 0 | -7.312453 | 3.670604  | 1.753373  |
| 97  | 1  | 0 | -7.291898 | 3.396847  | -2.285557 |
| 98  | 1  | 0 | -7.128807 | -1.604006 | 4.034624  |
| 99  | 1  | 0 | -7.261499 | -2.349973 | -4.047553 |
| 100 | 1  | 0 | -3.439146 | -6.234701 | 2.484890  |
| 101 | 1  | 0 | -3.191755 | -6.784474 | -1.201705 |
| 102 | 1  | 0 | 6.319446  | -0.315673 | 5.099950  |
| 103 | 1  | 0 | 6.232453  | 3.226862  | 3.791830  |
| 104 | 1  | 0 | 4.270437  | -2.865863 | 6.150410  |
| 105 | 1  | 0 | 0.447541  | -3.871361 | 5.187098  |
| 106 | 1  | 0 | -3.250137 | -4.031173 | 4.998705  |
| 107 | 1  | 0 | -1.061595 | -0.627642 | 5.872726  |
| 108 | 1  | 0 | -5.911613 | -0.699935 | 5.892788  |
| 109 | 1  | 0 | -5.767858 | 2.406230  | 4.621818  |
| 110 | 1  | 0 | 0.866211  | 5.420849  | 3.522721  |
| 111 | 1  | 0 | -3.556877 | 5.306972  | 3.442252  |
| 112 | 1  | 0 | -1.179467 | 2.777470  | 4.599418  |
| 113 | 1  | 0 | -3.751724 | 5.296404  | -4.229726 |
| 114 | 1  | 0 | 1.089140  | 5.267238  | -4.118030 |
| 115 | 1  | 0 | -5.194971 | 1.958637  | -4.944866 |
| 116 | 1  | 0 | -1.570077 | 1.819106  | -5.025685 |
| 117 | 1  | 0 | 6.554042  | 3.209692  | -3.880188 |
| 118 | 1  | 0 | -5.673087 | -1.956936 | -5.789107 |
| 119 | 1  | 0 | -3.619127 | -4.509777 | -4.647911 |
| 120 | 1  | 0 | 1.010578  | -4.843744 | -4.549138 |
| 121 | 1  | 0 | 4.266684  | -4.107565 | -5.530908 |
| 122 | 1  | 0 | 6.897938  | -0.724537 | -4.758633 |
| 123 | 1  | 0 | -1.207565 | -2.050148 | -5.745316 |
| 124 | 14 | 0 | -1.284889 | 3.233822  | -1.902893 |
| 125 | 79 | 0 | -0.290108 | 0.288135  | -0.855755 |
| 126 | 79 | 0 | 0.893550  | -2.118658 | -0.699014 |
| 127 | 79 | 0 | 0.323337  | -0.736749 | 1.522142  |

-----  
Zero-point correction= 0.309028 (Hartree/Particle)  
Thermal correction to Energy= 0.387205  
Thermal correction to Enthalpy= 0.388149  
Thermal correction to Gibbs Free Energy= 0.207526  
Sum of electronic and zero-point Energies= -13739.827432  
Sum of electronic and thermal Energies= -13739.749255  
Sum of electronic and thermal Enthalpies= -13739.748311  
Sum of electronic and thermal Free Energies= -13739.928934

M06-L/def2-TZVP//b3lyp/6-31G(d,p)-LANL2DZ Single point energy: -13743.078156

## INT1

**Charge: 1 multiplicity: 1**

-----  

| Center<br>Number | Atomic<br>Number | Atomic<br>Type | Coordinates (Angstroms) |          |          |
|------------------|------------------|----------------|-------------------------|----------|----------|
|                  |                  |                | X                       | Y        | Z        |
| 1                | 14               | 0              | 4.248479                | 5.077511 | 0.706500 |

-----

|    |    |   |           |           |           |
|----|----|---|-----------|-----------|-----------|
| 2  | 14 | 0 | 6.497486  | 3.163091  | 1.710097  |
| 3  | 14 | 0 | 4.152402  | 4.588313  | -2.391285 |
| 4  | 14 | 0 | 6.241876  | 2.447492  | -3.020172 |
| 5  | 8  | 0 | 5.071063  | 3.785260  | 1.229250  |
| 6  | 8  | 0 | 6.615526  | 1.781884  | 0.848112  |
| 7  | 8  | 0 | 4.253168  | 5.279156  | -0.907378 |
| 8  | 8  | 0 | 4.891709  | 3.152607  | -2.429093 |
| 9  | 8  | 0 | 6.100861  | 0.895325  | -2.534913 |
| 10 | 14 | 0 | -1.725687 | 2.144074  | 3.556568  |
| 11 | 14 | 0 | -4.799964 | 2.052247  | 3.719999  |
| 12 | 14 | 0 | -6.011870 | 3.283256  | -1.763653 |
| 13 | 14 | 0 | -3.737755 | 5.035421  | -2.988330 |
| 14 | 14 | 0 | 1.120098  | 4.762931  | -3.130744 |
| 15 | 14 | 0 | -2.157860 | 0.727323  | -3.926596 |
| 16 | 14 | 0 | -5.272976 | 1.000610  | -3.698069 |
| 17 | 14 | 0 | -5.810080 | 3.773084  | 1.345390  |
| 18 | 14 | 0 | -3.503763 | 5.747729  | 1.755319  |
| 19 | 14 | 0 | 1.290437  | 5.345818  | 1.595430  |
| 20 | 14 | 0 | -1.337026 | 3.739618  | 0.875109  |
| 21 | 8  | 0 | -3.228630 | 2.086595  | 4.182654  |
| 22 | 8  | 0 | -5.143314 | 4.544322  | -2.325437 |
| 23 | 8  | 0 | 0.065853  | 3.658868  | -2.536050 |
| 24 | 8  | 0 | -2.559379 | 3.909165  | -2.754657 |
| 25 | 8  | 0 | -5.421524 | 1.867096  | -2.331813 |
| 26 | 8  | 0 | -1.485715 | 1.486459  | -2.615684 |
| 27 | 8  | 0 | 2.609950  | 4.245973  | -2.753573 |
| 28 | 8  | 0 | -5.893391 | 3.168008  | -0.154432 |
| 29 | 8  | 0 | -1.476954 | 2.904079  | -0.502800 |
| 30 | 8  | 0 | -3.739928 | 0.403416  | -3.759013 |
| 31 | 8  | 0 | -5.001523 | 5.195688  | 1.384157  |
| 32 | 8  | 0 | 0.187859  | 4.278151  | 1.028810  |
| 33 | 8  | 0 | -2.341821 | 5.011157  | 0.844732  |
| 34 | 8  | 0 | -4.978607 | 2.671929  | 2.224469  |
| 35 | 8  | 0 | -1.761839 | 2.720939  | 2.045912  |
| 36 | 8  | 0 | 2.752047  | 4.681327  | 1.254035  |
| 37 | 14 | 0 | 7.139725  | 0.251695  | 1.018138  |
| 38 | 14 | 0 | 6.969337  | -0.363400 | -1.982116 |
| 39 | 8  | 0 | 6.905242  | -0.551571 | -0.364768 |
| 40 | 14 | 0 | 0.987832  | -2.905578 | 4.189701  |
| 41 | 14 | 0 | -1.057743 | -0.658772 | 4.450319  |
| 42 | 14 | 0 | -5.818119 | -0.635517 | 4.768334  |
| 43 | 14 | 0 | 3.792461  | -4.398329 | -4.171963 |
| 44 | 14 | 0 | -3.547915 | -2.682570 | 4.287522  |
| 45 | 14 | 0 | 6.239074  | -2.428131 | -4.041197 |
| 46 | 14 | 0 | -3.196661 | -5.443003 | -0.771392 |
| 47 | 14 | 0 | -0.108783 | -5.500791 | -0.889471 |
| 48 | 14 | 0 | 0.832717  | -4.170268 | -3.499974 |
| 49 | 14 | 0 | -1.487647 | -2.260232 | -4.212833 |
| 50 | 14 | 0 | -6.422010 | -1.840372 | -4.013317 |
| 51 | 14 | 0 | 4.059011  | -3.052931 | 4.604116  |
| 52 | 14 | 0 | -4.079151 | -3.717899 | -3.158795 |
| 53 | 14 | 0 | 6.385951  | -1.348884 | 3.557565  |
| 54 | 14 | 0 | -3.046766 | -4.864457 | 2.342943  |
| 55 | 14 | 0 | 0.057012  | -5.004494 | 2.201899  |
| 56 | 8  | 0 | 0.246104  | -1.487206 | 3.951516  |
| 57 | 8  | 0 | -1.074199 | 0.654197  | 3.491624  |
| 58 | 8  | 0 | -5.319511 | 0.508464  | 3.698363  |
| 59 | 8  | 0 | -4.961224 | -2.014259 | 4.650653  |
| 60 | 8  | 0 | 4.785827  | -3.119266 | -4.201208 |
| 61 | 8  | 0 | -2.397826 | -1.538219 | 4.238630  |

|     |   |   |           |           |           |
|-----|---|---|-----------|-----------|-----------|
| 62  | 8 | 0 | -1.666573 | -5.562511 | -1.362239 |
| 63  | 8 | 0 | 0.912895  | -3.746501 | 2.780756  |
| 64  | 8 | 0 | -3.631056 | -3.425314 | 2.832431  |
| 65  | 8 | 0 | 6.317300  | -1.722548 | -2.566452 |
| 66  | 8 | 0 | 2.370525  | -3.758532 | -3.690287 |
| 67  | 8 | 0 | -3.141697 | -4.825077 | 0.726227  |
| 68  | 8 | 0 | 0.048365  | -4.727035 | 0.570534  |
| 69  | 8 | 0 | -0.038290 | -2.842570 | -3.810847 |
| 70  | 8 | 0 | -1.330304 | -0.664919 | -3.899753 |
| 71  | 8 | 0 | -6.333271 | -0.229684 | -3.697187 |
| 72  | 8 | 0 | -5.289202 | -2.639624 | -3.136701 |
| 73  | 8 | 0 | 5.024234  | -2.242397 | 3.577149  |
| 74  | 8 | 0 | -2.642197 | -2.942798 | -3.292564 |
| 75  | 8 | 0 | -1.462468 | -5.024630 | 2.793358  |
| 76  | 8 | 0 | 0.720663  | -4.575264 | -1.917654 |
| 77  | 8 | 0 | -4.106446 | -4.495493 | -1.723135 |
| 78  | 8 | 0 | 6.278748  | -0.471676 | 2.188090  |
| 79  | 8 | 0 | 2.529961  | -2.512881 | 4.438435  |
| 80  | 1 | 0 | 7.600408  | 4.030955  | 1.354125  |
| 81  | 1 | 0 | 7.377213  | 3.156750  | -2.431648 |
| 82  | 1 | 0 | 8.529197  | 0.317967  | 1.394328  |
| 83  | 1 | 0 | 8.340466  | -0.132425 | -2.410738 |
| 84  | 1 | 0 | 7.588901  | -2.155656 | 3.687565  |
| 85  | 1 | 0 | 7.209378  | -3.482843 | -3.995827 |
| 86  | 1 | 0 | 4.183818  | -5.504680 | -3.226284 |
| 87  | 1 | 0 | 4.242370  | -4.438675 | 4.292200  |
| 88  | 1 | 0 | 0.752088  | -6.217949 | 2.575867  |
| 89  | 1 | 0 | 0.478438  | -6.828879 | -0.832215 |
| 90  | 1 | 0 | 4.827182  | 6.287109  | 1.269138  |
| 91  | 1 | 0 | 4.765675  | 5.512410  | -3.330528 |
| 92  | 1 | 0 | 1.219431  | 6.646935  | 0.921761  |
| 93  | 1 | 0 | 0.924895  | 6.084034  | -2.553395 |
| 94  | 1 | 0 | -3.435052 | 7.098174  | 1.280966  |
| 95  | 1 | 0 | -3.423948 | 6.313484  | -2.377102 |
| 96  | 1 | 0 | -7.150334 | 4.047272  | 1.818509  |
| 97  | 1 | 0 | -7.366088 | 3.538675  | -2.191863 |
| 98  | 1 | 0 | -7.108476 | -1.088163 | 4.404031  |
| 99  | 1 | 0 | -7.723588 | -2.294083 | -3.599904 |
| 100 | 1 | 0 | -3.748805 | -5.992805 | 2.949492  |
| 101 | 1 | 0 | -3.732967 | -6.768322 | -0.704635 |
| 102 | 1 | 0 | 6.425964  | -0.465373 | 4.688820  |
| 103 | 1 | 0 | 6.446444  | 2.994743  | 3.173756  |
| 104 | 1 | 0 | 4.311503  | -2.836334 | 5.997625  |
| 105 | 1 | 0 | 0.395394  | -3.688995 | 5.297232  |
| 106 | 1 | 0 | -3.310391 | -3.660354 | 5.311278  |
| 107 | 1 | 0 | -0.907644 | -0.334445 | 5.861596  |
| 108 | 1 | 0 | -5.746624 | -0.144475 | 6.137958  |
| 109 | 1 | 0 | -5.516090 | 2.870390  | 4.674491  |
| 110 | 1 | 0 | 1.191424  | 5.454877  | 3.050725  |
| 111 | 1 | 0 | -3.229482 | 5.574594  | 3.207242  |
| 112 | 1 | 0 | -0.922999 | 2.992331  | 4.391182  |
| 113 | 1 | 0 | -3.846736 | 5.128942  | -4.429336 |
| 114 | 1 | 0 | 0.985189  | 4.845922  | -4.567822 |
| 115 | 1 | 0 | -5.494275 | 1.837778  | -4.864042 |
| 116 | 1 | 0 | -1.890893 | 1.498841  | -5.124285 |
| 117 | 1 | 0 | 6.343670  | 2.514677  | -4.489281 |
| 118 | 1 | 0 | -6.215639 | -2.088871 | -5.442328 |
| 119 | 1 | 0 | -4.233772 | -4.677910 | -4.256095 |
| 120 | 1 | 0 | 0.371509  | -5.254124 | -4.377856 |
| 121 | 1 | 0 | 3.601693  | -4.752400 | -5.570423 |



|     |    |   |           |           |           |
|-----|----|---|-----------|-----------|-----------|
| 122 | 1  | 0 | 6.439284  | -1.476676 | -5.143290 |
| 123 | 1  | 0 | -1.764936 | -2.419459 | -5.625024 |
| 124 | 14 | 0 | -1.361374 | 3.050882  | -2.104231 |
| 125 | 79 | 0 | -0.316640 | -0.142512 | -1.235583 |
| 126 | 79 | 0 | 0.480500  | -2.198437 | 0.239068  |
| 127 | 79 | 0 | 1.237677  | 0.303450  | 0.937279  |
| 128 | 6  | 0 | 3.331032  | 2.439538  | 4.346091  |
| 129 | 1  | 0 | 3.988949  | 2.054004  | 5.131989  |
| 130 | 1  | 0 | 3.799117  | 3.334855  | 3.926415  |
| 131 | 1  | 0 | 2.378133  | 2.722584  | 4.802218  |
| 132 | 6  | 0 | 3.126483  | 1.375120  | 3.282786  |
| 133 | 1  | 0 | 4.068485  | 1.068510  | 2.817643  |
| 134 | 1  | 0 | 2.644273  | 0.486694  | 3.694918  |
| 135 | 8  | 0 | 2.217507  | 1.847815  | 2.246483  |
| 136 | 1  | 0 | 2.613143  | 2.605097  | 1.775862  |

-----

Zero-point correction= 0.391277 (Hartree/Particle)  
 Thermal correction to Energy= 0.475228  
 Thermal correction to Enthalpy= 0.476172  
 Thermal correction to Gibbs Free Energy= 0.282136  
 Sum of electronic and zero-point Energies= -13894.871921  
 Sum of electronic and thermal Energies= -13894.787970  
 Sum of electronic and thermal Enthalpies= -13894.787026  
 Sum of electronic and thermal Free Energies= -13894.981062

M06-L/def2-TZVP//b3lyp/6-31G(d,p)-LANL2DZ Single point energy: -13898.190026

## INT2

**Charge: 1 multiplicity: 3**

-----

| Center<br>Number | Atomic<br>Number | Atomic<br>Type | Coordinates (Angstroms) |          |           |
|------------------|------------------|----------------|-------------------------|----------|-----------|
|                  |                  |                | X                       | Y        | Z         |
| 1                | 14               | 0              | -4.031948               | 5.064809 | 1.491094  |
| 2                | 14               | 0              | -6.203197               | 3.103831 | 2.549933  |
| 3                | 14               | 0              | -4.192943               | 4.790825 | -1.631142 |
| 4                | 14               | 0              | -6.357954               | 2.702848 | -2.225428 |
| 5                | 8                | 0              | -4.835611               | 3.752467 | 1.965730  |
| 6                | 8                | 0              | -6.426536               | 1.790481 | 1.599097  |
| 7                | 8                | 0              | -4.214203               | 5.361424 | -0.109023 |
| 8                | 8                | 0              | -4.898173               | 3.316757 | -1.760217 |
| 9                | 8                | 0              | -6.193952               | 1.125012 | -1.852419 |
| 10               | 14               | 0              | 2.126969                | 1.907982 | 3.613403  |
| 11               | 14               | 0              | 5.209703                | 1.774696 | 3.515330  |
| 12               | 14               | 0              | 5.964972                | 3.357096 | -1.961661 |
| 13               | 14               | 0              | 3.613419                | 5.217300 | -2.860284 |
| 14               | 14               | 0              | -1.217647               | 4.982891 | -2.608823 |
| 15               | 14               | 0              | 1.912964                | 0.989067 | -3.939753 |
| 16               | 14               | 0              | 5.030810                | 1.213879 | -3.971653 |
| 17               | 14               | 0              | 6.038218                | 3.650300 | 1.181288  |
| 18               | 14               | 0              | 3.805726                | 5.607368 | 1.920456  |
| 19               | 14               | 0              | -1.009621               | 5.259646 | 2.141218  |
| 20               | 14               | 0              | 1.527764                | 3.682087 | 1.082316  |
| 21               | 8                | 0              | 3.669225                | 1.758895 | 4.098866  |
| 22               | 8                | 0              | 5.060163                | 4.652514 | -2.360250 |
| 23               | 8                | 0              | -0.173571               | 3.803902 | -2.179099 |
| 24               | 8                | 0              | 2.405934                | 4.153600 | -2.562073 |
| 25               | 8                | 0              | 5.313696                | 1.984464 | -2.565064 |
| 26               | 8                | 0              | 1.417938                | 1.696656 | -2.562364 |

|    |    |   |           |           |           |
|----|----|---|-----------|-----------|-----------|
| 27 | 8  | 0 | -2.691703 | 4.462159  | -2.146191 |
| 28 | 8  | 0 | 5.982582  | 3.143305  | -0.353540 |
| 29 | 8  | 0 | 1.526217  | 2.926231  | -0.337771 |
| 30 | 8  | 0 | 3.503029  | 0.614814  | -3.959255 |
| 31 | 8  | 0 | 5.264973  | 5.076566  | 1.396602  |
| 32 | 8  | 0 | 0.047703  | 4.231725  | 1.429748  |
| 33 | 8  | 0 | 2.577955  | 4.913492  | 1.070167  |
| 34 | 8  | 0 | 5.262433  | 2.502255  | 2.061922  |
| 35 | 8  | 0 | 2.008272  | 2.550535  | 2.140664  |
| 36 | 8  | 0 | -2.496128 | 4.674522  | 1.841135  |
| 37 | 14 | 0 | -6.937505 | 0.254372  | 1.729383  |
| 38 | 14 | 0 | -7.031490 | -0.166567 | -1.306638 |
| 39 | 8  | 0 | -6.831375 | -0.459056 | 0.276776  |
| 40 | 14 | 0 | -0.594744 | -3.171860 | 4.148368  |
| 41 | 14 | 0 | 1.522833  | -0.963779 | 4.387763  |
| 42 | 14 | 0 | 6.278304  | -0.984304 | 4.300589  |
| 43 | 14 | 0 | -4.096263 | -4.066336 | -4.025925 |
| 44 | 14 | 0 | 3.963455  | -2.972129 | 3.878803  |
| 45 | 14 | 0 | -6.498617 | -2.091027 | -3.560447 |
| 46 | 14 | 0 | 3.142977  | -5.384075 | -1.308617 |
| 47 | 14 | 0 | 0.058819  | -5.419339 | -1.167524 |
| 48 | 14 | 0 | -1.080194 | -3.900985 | -3.593599 |
| 49 | 14 | 0 | 1.188284  | -1.949217 | -4.374016 |
| 50 | 14 | 0 | 6.126073  | -1.594251 | -4.563171 |
| 51 | 14 | 0 | -3.611736 | -3.303051 | 4.809083  |
| 52 | 14 | 0 | 3.832742  | -3.503580 | -3.643354 |
| 53 | 14 | 0 | -5.994190 | -1.518936 | 4.078503  |
| 54 | 14 | 0 | 3.248804  | -5.015242 | 1.841359  |
| 55 | 14 | 0 | 0.140853  | -5.122347 | 1.954169  |
| 56 | 8  | 0 | 0.205876  | -1.776314 | 3.923221  |
| 57 | 8  | 0 | 1.424091  | 0.410121  | 3.463364  |
| 58 | 8  | 0 | 5.700914  | 0.230538  | 3.354129  |
| 59 | 8  | 0 | 5.421363  | -2.363443 | 4.158956  |
| 60 | 8  | 0 | -5.067787 | -2.772990 | -3.890793 |
| 61 | 8  | 0 | 2.873321  | -1.766802 | 4.020624  |
| 62 | 8  | 0 | 1.565970  | -5.466912 | -1.775586 |
| 63 | 8  | 0 | -0.666455 | -3.928748 | 2.699864  |
| 64 | 8  | 0 | 3.878574  | -3.608274 | 2.376607  |
| 65 | 8  | 0 | -6.440145 | -1.478211 | -2.045017 |
| 66 | 8  | 0 | -2.629590 | -3.479389 | -3.615805 |
| 67 | 8  | 0 | 3.214222  | -4.869686 | 0.228713  |
| 68 | 8  | 0 | 0.028130  | -4.739947 | 0.345055  |
| 69 | 8  | 0 | -0.234602 | -2.559746 | -3.892877 |
| 70 | 8  | 0 | 1.059087  | -0.384145 | -3.983524 |
| 71 | 8  | 0 | 6.091786  | -0.009130 | -4.137070 |
| 72 | 8  | 0 | 5.057737  | -2.443509 | -3.650665 |
| 73 | 8  | 0 | -4.655131 | -2.433713 | 3.919795  |
| 74 | 8  | 0 | 2.394995  | -2.721589 | -3.597220 |
| 75 | 8  | 0 | 1.706204  | -5.185500 | 2.411745  |
| 76 | 8  | 0 | -0.834117 | -4.392077 | -2.044275 |
| 77 | 8  | 0 | 3.974382  | -4.378500 | -2.267674 |
| 78 | 8  | 0 | -5.996441 | -0.564349 | 2.758987  |
| 79 | 8  | 0 | -2.090586 | -2.756618 | 4.562639  |
| 80 | 1  | 0 | -7.321043 | 4.003958  | 2.344658  |
| 81 | 1  | 0 | -7.426885 | 3.383146  | -1.495805 |
| 82 | 1  | 0 | -8.291244 | 0.303521  | 2.217944  |
| 83 | 1  | 0 | -8.427495 | 0.107164  | -1.610839 |
| 84 | 1  | 0 | -7.194470 | -2.324734 | 4.255428  |
| 85 | 1  | 0 | -7.476556 | -3.138078 | -3.503353 |
| 86 | 1  | 0 | -4.423666 | -5.229060 | -3.126917 |

|     |    |   |           |           |           |
|-----|----|---|-----------|-----------|-----------|
| 87  | 1  | 0 | -3.838949 | -4.667636 | 4.423565  |
| 88  | 1  | 0 | -0.527801 | -6.354055 | 2.305386  |
| 89  | 1  | 0 | -0.548438 | -6.737861 | -1.146556 |
| 90  | 1  | 0 | -4.535592 | 6.240252  | 2.175026  |
| 91  | 1  | 0 | -4.869472 | 5.774304  | -2.454528 |
| 92  | 1  | 0 | -0.965284 | 6.595994  | 1.549102  |
| 93  | 1  | 0 | -0.969868 | 6.264514  | -1.968002 |
| 94  | 1  | 0 | 3.708404  | 6.987900  | 1.543356  |
| 95  | 1  | 0 | 3.380890  | 6.449665  | -2.144702 |
| 96  | 1  | 0 | 7.415753  | 3.880559  | 1.562964  |
| 97  | 1  | 0 | 7.288484  | 3.639604  | -2.476093 |
| 98  | 1  | 0 | 7.523888  | -1.415780 | 3.798232  |
| 99  | 1  | 0 | 7.451296  | -2.088450 | -4.291131 |
| 100 | 1  | 0 | 3.990574  | -6.187318 | 2.311690  |
| 101 | 1  | 0 | 3.659591  | -6.716682 | -1.371279 |
| 102 | 1  | 0 | -5.930007 | -0.713774 | 5.264354  |
| 103 | 1  | 0 | -6.032364 | 2.839945  | 3.988063  |
| 104 | 1  | 0 | -3.744336 | -3.182418 | 6.230768  |
| 105 | 1  | 0 | 0.088025  | -4.015188 | 5.147711  |
| 106 | 1  | 0 | 3.782080  | -4.014766 | 4.850920  |
| 107 | 1  | 0 | 1.477082  | -0.715623 | 5.820140  |
| 108 | 1  | 0 | 6.324263  | -0.580117 | 5.699324  |
| 109 | 1  | 0 | 6.011121  | 2.527383  | 4.462749  |
| 110 | 1  | 0 | -0.774637 | 5.264009  | 3.584682  |
| 111 | 1  | 0 | 3.645044  | 5.340463  | 3.375310  |
| 112 | 1  | 0 | 1.412493  | 2.701894  | 4.576256  |
| 113 | 1  | 0 | 3.615293  | 5.401664  | -4.298893 |
| 114 | 1  | 0 | -1.214666 | 5.164280  | -4.047425 |
| 115 | 1  | 0 | 5.177665  | 2.134899  | -5.087300 |
| 116 | 1  | 0 | 1.561312  | 1.840897  | -5.063870 |
| 117 | 1  | 0 | -6.577632 | 2.872531  | -3.671166 |
| 118 | 1  | 0 | 5.797210  | -1.749440 | -5.982194 |
| 119 | 1  | 0 | 3.888142  | -4.397324 | -4.806362 |
| 120 | 1  | 0 | -0.718176 | -4.930116 | -4.576895 |
| 121 | 1  | 0 | -4.030064 | -4.326059 | -5.457059 |
| 122 | 1  | 0 | -6.779267 | -1.065407 | -4.576819 |
| 123 | 1  | 0 | 1.342900  | -2.034216 | -5.810007 |
| 124 | 14 | 0 | 1.298504  | 3.172112  | -1.919102 |
| 125 | 79 | 0 | -0.508334 | -2.266501 | 0.010003  |
| 126 | 79 | 0 | 0.160213  | -0.043958 | 1.350143  |
| 127 | 79 | 0 | -1.499280 | 0.121935  | -0.769659 |
| 128 | 6  | 0 | -2.571105 | 0.142794  | -4.369978 |
| 129 | 1  | 0 | -2.300226 | 0.370368  | -5.406902 |
| 130 | 1  | 0 | -3.558113 | -0.325480 | -4.361462 |
| 131 | 1  | 0 | -1.845245 | -0.574973 | -3.981652 |
| 132 | 6  | 0 | -2.563753 | 1.420821  | -3.558919 |
| 133 | 1  | 0 | -3.302530 | 2.135907  | -3.932033 |
| 134 | 1  | 0 | -1.581034 | 1.900197  | -3.570542 |
| 135 | 8  | 0 | -2.916551 | 1.123916  | -2.178028 |
| 136 | 1  | 0 | -3.466535 | 1.842164  | -1.816916 |
| 137 | 8  | 0 | -3.063168 | 1.076813  | 3.088800  |
| 138 | 8  | 0 | -1.975216 | 1.526966  | 3.383484  |

-----

|                                            |                             |
|--------------------------------------------|-----------------------------|
| Zero-point correction=                     | 0.395326 (Hartree/Particle) |
| Thermal correction to Energy=              | 0.483564                    |
| Thermal correction to Enthalpy=            | 0.484508                    |
| Thermal correction to Gibbs Free Energy=   | 0.276969                    |
| Sum of electronic and zero-point Energies= | -14045.187496               |
| Sum of electronic and thermal Energies=    | -14045.099259               |
| Sum of electronic and thermal Enthalpies=  | -14045.098314               |

Sum of electronic and thermal Free Energies= -14045.305853  
M06-L/def2-TZVP//b3lyp/6-31G(d,p)-LANL2DZ Single point energy: -14048.564519

### INT3

Charge: 1 multiplicity: 3

| Center<br>Number | Atomic<br>Number | Atomic<br>Type | Coordinates (Angstroms) |           |           |
|------------------|------------------|----------------|-------------------------|-----------|-----------|
|                  |                  |                | X                       | Y         | Z         |
| 1                | 14               | 0              | 4.183297                | 5.135366  | 0.874318  |
| 2                | 14               | 0              | 6.425853                | 3.225106  | 1.906761  |
| 3                | 14               | 0              | 4.153945                | 4.668441  | -2.223669 |
| 4                | 14               | 0              | 6.267127                | 2.549387  | -2.833214 |
| 5                | 8                | 0              | 5.013193                | 3.844068  | 1.395141  |
| 6                | 8                | 0              | 6.571261                | 1.848396  | 1.040308  |
| 7                | 8                | 0              | 4.230131                | 5.352534  | -0.737656 |
| 8                | 8                | 0              | 4.904445                | 3.238865  | -2.258253 |
| 9                | 8                | 0              | 6.135988                | 0.991044  | -2.366667 |
| 10               | 14               | 0              | -1.826468               | 2.129384  | 3.582536  |
| 11               | 14               | 0              | -4.900311               | 2.011501  | 3.684480  |
| 12               | 14               | 0              | -6.013268               | 3.288088  | -1.811137 |
| 13               | 14               | 0              | -3.730706               | 5.063408  | -2.973431 |
| 14               | 14               | 0              | 1.137358                | 4.829325  | -3.023580 |
| 15               | 14               | 0              | -2.098859               | 0.780099  | -3.918090 |
| 16               | 14               | 0              | -5.219501               | 1.027062  | -3.748938 |
| 17               | 14               | 0              | -5.876623               | 3.747063  | 1.307259  |
| 18               | 14               | 0              | -3.593680               | 5.731979  | 1.779081  |
| 19               | 14               | 0              | 1.213035                | 5.370437  | 1.711009  |
| 20               | 14               | 0              | -1.390786               | 3.748819  | 0.923830  |
| 21               | 8                | 0              | -3.340805               | 2.069833  | 4.180275  |
| 22               | 8                | 0              | -5.151647               | 4.562871  | -2.350489 |
| 23               | 8                | 0              | 0.067523                | 3.722516  | -2.462052 |
| 24               | 8                | 0              | -2.560434               | 3.934730  | -2.713732 |
| 25               | 8                | 0              | -5.400725               | 1.880407  | -2.379257 |
| 26               | 8                | 0              | -1.451610               | 1.531535  | -2.592357 |
| 27               | 8                | 0              | 2.619987                | 4.320825  | -2.616849 |
| 28               | 8                | 0              | -5.920982               | 3.160201  | -0.201573 |
| 29               | 8                | 0              | -1.487991               | 2.913546  | -0.460355 |
| 30               | 8                | 0              | -3.680876               | 0.440502  | -3.784458 |
| 31               | 8                | 0              | -5.084345               | 5.176374  | 1.383468  |
| 32               | 8                | 0              | 0.118008                | 4.305278  | 1.118726  |
| 33               | 8                | 0              | -2.422308               | 4.999112  | 0.878245  |
| 34               | 8                | 0              | -5.059794               | 2.636676  | 2.189179  |
| 35               | 8                | 0              | -1.828617               | 2.707953  | 2.072745  |
| 36               | 8                | 0              | 2.686032                | 4.752970  | 1.389446  |
| 37               | 14               | 0              | 7.102844                | 0.321960  | 1.202072  |
| 38               | 14               | 0              | 6.995925                | -0.265475 | -1.806243 |
| 39               | 8                | 0              | 6.897339                | -0.471845 | -0.191121 |
| 40               | 14               | 0              | 0.910130                | -2.910392 | 4.222079  |
| 41               | 14               | 0              | -1.167648               | -0.681898 | 4.466714  |
| 42               | 14               | 0              | -5.919693               | -0.695428 | 4.688675  |
| 43               | 14               | 0              | 3.897117                | -4.305069 | -4.094304 |
| 44               | 14               | 0              | -3.636318               | -2.721581 | 4.237506  |
| 45               | 14               | 0              | 6.324061                | -2.315706 | -3.895114 |
| 46               | 14               | 0              | -3.160746               | -5.430131 | -0.841680 |
| 47               | 14               | 0              | -0.072621               | -5.473994 | -0.905288 |
| 48               | 14               | 0              | 0.918568                | -4.103800 | -3.481850 |
| 49               | 14               | 0              | -1.401070               | -2.203582 | -4.219970 |

|     |    |   |           |           |           |
|-----|----|---|-----------|-----------|-----------|
| 50  | 14 | 0 | -6.341446 | -1.819300 | -4.114993 |
| 51  | 14 | 0 | 3.973626  | -3.036445 | 4.696398  |
| 52  | 14 | 0 | -4.001782 | -3.689739 | -3.232349 |
| 53  | 14 | 0 | 6.311078  | -1.307318 | 3.711307  |
| 54  | 14 | 0 | -3.071229 | -4.878553 | 2.280349  |
| 55  | 14 | 0 | 0.037831  | -4.997341 | 2.202614  |
| 56  | 8  | 0 | 0.137802  | -1.511133 | 3.967575  |
| 57  | 8  | 0 | -1.191199 | 0.630788  | 3.510181  |
| 58  | 8  | 0 | -5.394878 | 0.458588  | 3.642775  |
| 59  | 8  | 0 | -5.067507 | -2.079312 | 4.573869  |
| 60  | 8  | 0 | 4.878952  | -3.019977 | -4.087945 |
| 61  | 8  | 0 | -2.504664 | -1.560472 | 4.236266  |
| 62  | 8  | 0 | -1.618064 | -5.541245 | -1.405923 |
| 63  | 8  | 0 | 0.878394  | -3.744635 | 2.806174  |
| 64  | 8  | 0 | -3.671128 | -3.447227 | 2.770465  |
| 65  | 8  | 0 | 6.371913  | -1.630483 | -2.410552 |
| 66  | 8  | 0 | 2.459815  | -3.686789 | -3.619681 |
| 67  | 8  | 0 | -3.130176 | -4.824181 | 0.661264  |
| 68  | 8  | 0 | 0.054966  | -4.706815 | 0.566036  |
| 69  | 8  | 0 | 0.048437  | -2.777167 | -3.797285 |
| 70  | 8  | 0 | -1.266485 | -0.612859 | -3.875478 |
| 71  | 8  | 0 | -6.269904 | -0.212237 | -3.780313 |
| 72  | 8  | 0 | -5.214745 | -2.616172 | -3.226096 |
| 73  | 8  | 0 | 4.952107  | -2.208533 | 3.695141  |
| 74  | 8  | 0 | -2.560729 | -2.914933 | -3.327733 |
| 75  | 8  | 0 | -1.493429 | -5.032539 | 2.756947  |
| 76  | 8  | 0 | 0.764401  | -4.516573 | -1.900365 |
| 77  | 8  | 0 | -4.054714 | -4.479068 | -1.802679 |
| 78  | 8  | 0 | 6.219565  | -0.423832 | 2.344377  |
| 79  | 8  | 0 | 2.443001  | -2.503660 | 4.503493  |
| 80  | 1  | 0 | 7.529131  | 4.100241  | 1.581896  |
| 81  | 1  | 0 | 7.386952  | 3.259399  | -2.215327 |
| 82  | 1  | 0 | 8.484361  | 0.393832  | 1.606720  |
| 83  | 1  | 0 | 8.373887  | -0.022801 | -2.205262 |
| 84  | 1  | 0 | 7.517423  | -2.107550 | 3.858393  |
| 85  | 1  | 0 | 7.299000  | -3.366526 | -3.842729 |
| 86  | 1  | 0 | 4.273908  | -5.417138 | -3.151472 |
| 87  | 1  | 0 | 4.176601  | -4.420117 | 4.376067  |
| 88  | 1  | 0 | 0.733878  | -6.208629 | 2.575139  |
| 89  | 1  | 0 | 0.532157  | -6.790282 | -0.843144 |
| 90  | 1  | 0 | 4.741521  | 6.337034  | 1.462654  |
| 91  | 1  | 0 | 4.776272  | 5.604358  | -3.144183 |
| 92  | 1  | 0 | 1.138744  | 6.674033  | 1.047375  |
| 93  | 1  | 0 | 0.916839  | 6.141097  | -2.437887 |
| 94  | 1  | 0 | -3.525118 | 7.088346  | 1.318677  |
| 95  | 1  | 0 | -3.436239 | 6.337562  | -2.345448 |
| 96  | 1  | 0 | -7.227609 | 4.005937  | 1.755017  |
| 97  | 1  | 0 | -7.360617 | 3.532800  | -2.263290 |
| 98  | 1  | 0 | -7.198700 | -1.152703 | 4.294139  |
| 99  | 1  | 0 | -7.647238 | -2.289143 | -3.731004 |
| 100 | 1  | 0 | -3.774919 | -6.019391 | 2.861787  |
| 101 | 1  | 0 | -3.681384 | -6.760984 | -0.798237 |
| 102 | 1  | 0 | 6.322547  | -0.434999 | 4.851790  |
| 103 | 1  | 0 | 6.347266  | 3.038997  | 3.368900  |
| 104 | 1  | 0 | 4.200310  | -2.833111 | 6.096998  |
| 105 | 1  | 0 | 0.305158  | -3.707499 | 5.311713  |
| 106 | 1  | 0 | -3.400302 | -3.705692 | 5.252829  |
| 107 | 1  | 0 | -1.033490 | -0.367778 | 5.880651  |
| 108 | 1  | 0 | -5.878244 | -0.215246 | 6.063115  |
| 109 | 1  | 0 | -5.641242 | 2.814565  | 4.631911  |

|     |    |   |           |           |           |
|-----|----|---|-----------|-----------|-----------|
| 110 | 1  | 0 | 1.077649  | 5.462221  | 3.164472  |
| 111 | 1  | 0 | -3.346248 | 5.548610  | 3.234726  |
| 112 | 1  | 0 | -1.044482 | 2.972252  | 4.440500  |
| 113 | 1  | 0 | -3.809766 | 5.168925  | -4.416217 |
| 114 | 1  | 0 | 1.025892  | 4.922095  | -4.461951 |
| 115 | 1  | 0 | -5.424011 | 1.870076  | -4.913262 |
| 116 | 1  | 0 | -1.814046 | 1.559871  | -5.105627 |
| 117 | 1  | 0 | 6.398875  | 2.628894  | -4.298712 |
| 118 | 1  | 0 | -6.104883 | -2.056097 | -5.541346 |
| 119 | 1  | 0 | -4.127665 | -4.641587 | -4.339733 |
| 120 | 1  | 0 | 0.483263  | -5.183449 | -4.375742 |
| 121 | 1  | 0 | 3.732484  | -4.647481 | -5.499730 |
| 122 | 1  | 0 | 6.536835  | -1.355462 | -4.986917 |
| 123 | 1  | 0 | -1.649109 | -2.352878 | -5.639103 |
| 124 | 14 | 0 | -1.354114 | 3.091629  | -2.057694 |
| 125 | 79 | 0 | -0.254057 | -0.123205 | -1.270013 |
| 126 | 79 | 0 | 0.375492  | -2.271310 | 0.135377  |
| 127 | 79 | 0 | 0.962345  | 0.166601  | 1.128016  |
| 128 | 6  | 0 | 3.246452  | 1.864688  | 4.446751  |
| 129 | 1  | 0 | 4.305901  | 2.052318  | 4.644553  |
| 130 | 1  | 0 | 2.675133  | 2.752022  | 4.731867  |
| 131 | 1  | 0 | 2.922386  | 1.023524  | 5.066232  |
| 132 | 6  | 0 | 3.048096  | 1.542853  | 2.969310  |
| 133 | 1  | 0 | 3.366231  | 2.404900  | 2.343982  |
| 134 | 1  | 0 | 3.642471  | 0.684857  | 2.626822  |
| 135 | 8  | 0 | 1.697337  | 1.382814  | 2.659723  |
| 136 | 1  | 0 | 2.501872  | -0.788198 | -1.281040 |
| 137 | 8  | 0 | 2.235793  | 0.460690  | -2.620324 |
| 138 | 8  | 0 | 3.062061  | -0.343962 | -1.962764 |

-----

Zero-point correction= 0.392171 (Hartree/Particle)  
 Thermal correction to Energy= 0.476402  
 Thermal correction to Enthalpy= 0.477741  
 Thermal correction to Gibbs Free Energy= 0.274394  
 Sum of electronic and zero-point Energies= -14045.112893  
 Sum of electronic and thermal Energies= -14045.020662  
 Sum of electronic and thermal Enthalpies= -14045.027323  
 Sum of electronic and thermal Free Energies= -14045.230669

M06-L/def2-TZVP//b3lyp/6-31G(d,p)-LANL2DZ Single point energy: -14048.494807

## INT4

### Charge: 1 multiplicity: 3

-----

| Center<br>Number | Atomic<br>Number | Atomic<br>Type | Coordinates (Angstroms) |          |           |
|------------------|------------------|----------------|-------------------------|----------|-----------|
|                  |                  |                | X                       | Y        | Z         |
| 1                | 14               | 0              | 4.311353                | 5.029121 | 0.842268  |
| 2                | 14               | 0              | 6.528912                | 3.070000 | 1.818926  |
| 3                | 14               | 0              | 4.226481                | 4.607607 | -2.267217 |
| 4                | 14               | 0              | 6.310220                | 2.443710 | -2.928017 |
| 5                | 8                | 0              | 5.130260                | 3.720168 | 1.314002  |
| 6                | 8                | 0              | 6.651401                | 1.707396 | 0.922466  |
| 7                | 8                | 0              | 4.354248                | 5.252904 | -0.778230 |
| 8                | 8                | 0              | 4.928597                | 3.128285 | -2.341354 |
| 9                | 8                | 0              | 6.126422                | 0.896474 | -2.439795 |
| 10               | 14               | 0              | -1.724180               | 2.120156 | 3.586861  |
| 11               | 14               | 0              | -4.797458               | 2.058789 | 3.725015  |
| 12               | 14               | 0              | -5.952853               | 3.405187 | -1.743489 |

|    |    |   |           |           |           |
|----|----|---|-----------|-----------|-----------|
| 13 | 14 | 0 | -3.649801 | 5.152576  | -2.918888 |
| 14 | 14 | 0 | 1.202827  | 4.822233  | -3.029808 |
| 15 | 14 | 0 | -2.118943 | 0.842666  | -3.929311 |
| 16 | 14 | 0 | -5.229680 | 1.149384  | -3.714283 |
| 17 | 14 | 0 | -5.769669 | 3.834606  | 1.377003  |
| 18 | 14 | 0 | -3.444777 | 5.771385  | 1.839392  |
| 19 | 14 | 0 | 1.352465  | 5.318968  | 1.708498  |
| 20 | 14 | 0 | -1.290449 | 3.756536  | 0.938667  |
| 21 | 8  | 0 | -3.232527 | 2.088528  | 4.202666  |
| 22 | 8  | 0 | -5.067339 | 4.664905  | -2.280786 |
| 23 | 8  | 0 | 0.133769  | 3.714760  | -2.475600 |
| 24 | 8  | 0 | -2.484832 | 4.010623  | -2.696197 |
| 25 | 8  | 0 | -5.375197 | 1.991645  | -2.333096 |
| 26 | 8  | 0 | -1.455075 | 1.570663  | -2.595627 |
| 27 | 8  | 0 | 2.689365  | 4.276936  | -2.656545 |
| 28 | 8  | 0 | -5.844598 | 3.262675  | -0.136773 |
| 29 | 8  | 0 | -1.426459 | 2.945328  | -0.457402 |
| 30 | 8  | 0 | -3.704759 | 0.531500  | -3.779405 |
| 31 | 8  | 0 | -4.950997 | 5.248941  | 1.456405  |
| 32 | 8  | 0 | 0.228740  | 4.288137  | 1.111725  |
| 33 | 8  | 0 | -2.300251 | 5.025778  | 0.916221  |
| 34 | 8  | 0 | -4.963862 | 2.700543  | 2.237198  |
| 35 | 8  | 0 | -1.734627 | 2.713942  | 2.082256  |
| 36 | 8  | 0 | 2.810613  | 4.688788  | 1.354731  |
| 37 | 14 | 0 | 7.141054  | 0.166250  | 1.080930  |
| 38 | 14 | 0 | 6.987602  | -0.396619 | -1.922132 |
| 39 | 8  | 0 | 6.938135  | -0.625111 | -0.315822 |
| 40 | 14 | 0 | 0.924233  | -2.978854 | 4.143982  |
| 41 | 14 | 0 | -1.106713 | -0.715257 | 4.436803  |
| 42 | 14 | 0 | -5.855105 | -0.638533 | 4.715734  |
| 43 | 14 | 0 | 3.776922  | -4.349073 | -4.221389 |
| 44 | 14 | 0 | -3.616239 | -2.706136 | 4.214914  |
| 45 | 14 | 0 | 6.245264  | -2.410625 | -4.037831 |
| 46 | 14 | 0 | -3.251493 | -5.371945 | -0.894274 |
| 47 | 14 | 0 | -0.169659 | -5.473887 | -0.996398 |
| 48 | 14 | 0 | 0.814401  | -4.096734 | -3.567692 |
| 49 | 14 | 0 | -1.476300 | -2.146021 | -4.262918 |
| 50 | 14 | 0 | -6.406956 | -1.670725 | -4.091858 |
| 51 | 14 | 0 | 3.991132  | -3.168000 | 4.579140  |
| 52 | 14 | 0 | -4.092407 | -3.591503 | -3.255069 |
| 53 | 14 | 0 | 6.349118  | -1.471338 | 3.581126  |
| 54 | 14 | 0 | -3.116611 | -4.852880 | 2.233394  |
| 55 | 14 | 0 | -0.016606 | -5.030992 | 2.119239  |
| 56 | 8  | 0 | 0.185781  | -1.556159 | 3.924423  |
| 57 | 8  | 0 | -1.124197 | 0.610184  | 3.500814  |
| 58 | 8  | 0 | -5.322116 | 0.516196  | 3.674649  |
| 59 | 8  | 0 | -5.027476 | -2.034459 | 4.578474  |
| 60 | 8  | 0 | 4.785720  | -3.080764 | -4.221726 |
| 61 | 8  | 0 | -2.456113 | -1.574158 | 4.207966  |
| 62 | 8  | 0 | -1.721394 | -5.506258 | -1.485546 |
| 63 | 8  | 0 | 0.856724  | -3.802919 | 2.725997  |
| 64 | 8  | 0 | -3.691293 | -3.417542 | 2.742729  |
| 65 | 8  | 0 | 6.313886  | -1.721243 | -2.555057 |
| 66 | 8  | 0 | 2.359703  | -3.702789 | -3.734909 |
| 67 | 8  | 0 | -3.187769 | -4.784938 | 0.615404  |
| 68 | 8  | 0 | -0.027876 | -4.731454 | 0.485708  |
| 69 | 8  | 0 | -0.036374 | -2.752857 | -3.860653 |
| 70 | 8  | 0 | -1.306613 | -0.557513 | -3.928609 |
| 71 | 8  | 0 | -6.305248 | -0.067349 | -3.744659 |
| 72 | 8  | 0 | -5.288199 | -2.498144 | -3.222824 |

|     |    |   |           |           |           |
|-----|----|---|-----------|-----------|-----------|
| 73  | 8  | 0 | 4.971801  | -2.343797 | 3.577623  |
| 74  | 8  | 0 | -2.643832 | -2.834192 | -3.363264 |
| 75  | 8  | 0 | -1.539432 | -5.040088 | 2.699357  |
| 76  | 8  | 0 | 0.680867  | -4.534451 | -1.994089 |
| 77  | 8  | 0 | -4.141599 | -4.393679 | -1.832599 |
| 78  | 8  | 0 | 6.261269  | -0.565829 | 2.230238  |
| 79  | 8  | 0 | 2.470410  | -2.600576 | 4.405339  |
| 80  | 1  | 0 | 7.643013  | 3.931119  | 1.488424  |
| 81  | 1  | 0 | 7.438475  | 3.130062  | -2.314552 |
| 82  | 1  | 0 | 8.527667  | 0.207219  | 1.466256  |
| 83  | 1  | 0 | 8.362731  | -0.170186 | -2.347845 |
| 84  | 1  | 0 | 7.540801  | -2.297167 | 3.705915  |
| 85  | 1  | 0 | 7.204404  | -3.476883 | -4.003502 |
| 86  | 1  | 0 | 4.149450  | -5.476451 | -3.294285 |
| 87  | 1  | 0 | 4.163083  | -4.550967 | 4.242996  |
| 88  | 1  | 0 | 0.665281  | -6.256494 | 2.468019  |
| 89  | 1  | 0 | 0.410606  | -6.800785 | -0.952900 |
| 90  | 1  | 0 | 4.897280  | 6.221352  | 1.424956  |
| 91  | 1  | 0 | 4.861805  | 5.532953  | -3.188696 |
| 92  | 1  | 0 | 1.296784  | 6.630554  | 1.057577  |
| 93  | 1  | 0 | 1.022215  | 6.135824  | -2.429559 |
| 94  | 1  | 0 | -3.354679 | 7.130485  | 1.390580  |
| 95  | 1  | 0 | -3.324868 | 6.413792  | -2.281302 |
| 96  | 1  | 0 | -7.109641 | 4.114621  | 1.843531  |
| 97  | 1  | 0 | -7.300711 | 3.683159  | -2.177123 |
| 98  | 1  | 0 | -7.148033 | -1.068060 | 4.333057  |
| 99  | 1  | 0 | -7.716114 | -2.117776 | -3.696332 |
| 100 | 1  | 0 | -3.835350 | -5.984543 | 2.812273  |
| 101 | 1  | 0 | -3.800676 | -6.692197 | -0.855490 |
| 102 | 1  | 0 | 6.390238  | -0.612017 | 4.729861  |
| 103 | 1  | 0 | 6.463048  | 2.875131  | 3.279795  |
| 104 | 1  | 0 | 4.238048  | -2.981496 | 5.978481  |
| 105 | 1  | 0 | 0.317641  | -3.774274 | 5.233258  |
| 106 | 1  | 0 | -3.387556 | -3.701726 | 5.220333  |
| 107 | 1  | 0 | -0.950075 | -0.415497 | 5.850407  |
| 108 | 1  | 0 | -5.788453 | -0.173019 | 6.094343  |
| 109 | 1  | 0 | -5.511246 | 2.865530  | 4.689118  |
| 110 | 1  | 0 | 1.238456  | 5.399581  | 3.163670  |
| 111 | 1  | 0 | -3.181796 | 5.569056  | 3.289572  |
| 112 | 1  | 0 | -0.915004 | 2.937981  | 4.442231  |
| 113 | 1  | 0 | -3.745879 | 5.272634  | -4.358365 |
| 114 | 1  | 0 | 1.083300  | 4.934671  | -4.466270 |
| 115 | 1  | 0 | -5.428664 | 2.009927  | -4.866576 |
| 116 | 1  | 0 | -1.827778 | 1.633131  | -5.106488 |
| 117 | 1  | 0 | 6.413197  | 2.538656  | -4.391415 |
| 118 | 1  | 0 | -6.191819 | -1.896388 | -5.523360 |
| 119 | 1  | 0 | -4.249702 | -4.530428 | -4.370933 |
| 120 | 1  | 0 | 0.349281  | -5.159128 | -4.469216 |
| 121 | 1  | 0 | 3.594159  | -4.673903 | -5.628250 |
| 122 | 1  | 0 | 6.466790  | -1.440722 | -5.119035 |
| 123 | 1  | 0 | -1.744039 | -2.276536 | -5.679127 |
| 124 | 14 | 0 | -1.304490 | 3.123985  | -2.052915 |
| 125 | 79 | 0 | -0.470164 | -0.108223 | -1.185430 |
| 126 | 79 | 0 | 0.170245  | -2.294427 | 0.116363  |
| 127 | 79 | 0 | 0.932397  | 0.104229  | 1.104119  |
| 128 | 6  | 0 | 3.443687  | 1.965955  | 4.246182  |
| 129 | 1  | 0 | 4.433299  | 1.711911  | 4.638795  |
| 130 | 1  | 0 | 3.476652  | 2.989250  | 3.863303  |
| 131 | 1  | 0 | 2.724503  | 1.920455  | 5.068995  |
| 132 | 6  | 0 | 3.058169  | 0.999648  | 3.138751  |



|     |   |   |          |           |           |
|-----|---|---|----------|-----------|-----------|
| 133 | 1 | 0 | 3.761157 | 0.999317  | 2.289436  |
| 134 | 1 | 0 | 3.053787 | -0.051341 | 3.485789  |
| 135 | 8 | 0 | 1.776243 | 1.251031  | 2.643894  |
| 136 | 8 | 0 | 3.236550 | 1.385191  | -0.897960 |
| 137 | 8 | 0 | 3.792276 | 0.455646  | -0.127361 |
| 138 | 1 | 0 | 3.963902 | 1.747553  | -1.461738 |

-----

Zero-point correction= 0.392674 (Hartree/Particle)  
Thermal correction to Energy= 0.480547  
Thermal correction to Enthalpy= 0.481491  
Thermal correction to Gibbs Free Energy= 0.276833  
Sum of electronic and zero-point Energies= -14045.118995  
Sum of electronic and thermal Energies= -14045.031122  
Sum of electronic and thermal Enthalpies= -14045.030178  
Sum of electronic and thermal Free Energies= -14045.234837

M06-L/def2-TZVP//b3lyp/6-31G(d,p)-LANL2DZ Single point energy: -14048.5003578

## INT5

**Charge: 1 multiplicity: 3**

-----

| Center<br>Number | Atomic<br>Number | Atomic<br>Type | Coordinates (Angstroms) |          |           |
|------------------|------------------|----------------|-------------------------|----------|-----------|
|                  |                  |                | X                       | Y        | Z         |
| 1                | 14               | 0              | 4.280866                | 5.055444 | 0.844703  |
| 2                | 14               | 0              | 6.509593                | 3.101940 | 1.822689  |
| 3                | 14               | 0              | 4.197551                | 4.632993 | -2.265068 |
| 4                | 14               | 0              | 6.290648                | 2.493546 | -2.920681 |
| 5                | 8                | 0              | 5.104082                | 3.749107 | 1.328196  |
| 6                | 8                | 0              | 6.634735                | 1.740558 | 0.922728  |
| 7                | 8                | 0              | 4.321726                | 5.278045 | -0.771894 |
| 8                | 8                | 0              | 4.919850                | 3.177544 | -2.356164 |
| 9                | 8                | 0              | 6.091388                | 0.943575 | -2.389329 |
| 10               | 14               | 0              | -1.742469               | 2.110132 | 3.586970  |
| 11               | 14               | 0              | -4.814007               | 2.030468 | 3.723644  |
| 12               | 14               | 0              | -5.973185               | 3.379677 | -1.745466 |
| 13               | 14               | 0              | -3.679469               | 5.139920 | -2.916993 |
| 14               | 14               | 0              | 1.174374                | 4.836330 | -3.025996 |
| 15               | 14               | 0              | -2.122990               | 0.840069 | -3.930681 |
| 16               | 14               | 0              | -5.235759               | 1.130074 | -3.718675 |
| 17               | 14               | 0              | -5.793968               | 3.802517 | 1.375797  |
| 18               | 14               | 0              | -3.476927               | 5.753950 | 1.841619  |
| 19               | 14               | 0              | 1.320430                | 5.326543 | 1.713069  |
| 20               | 14               | 0              | -1.312679               | 3.752123 | 0.941295  |
| 21               | 8                | 0              | -3.250582               | 2.078675 | 4.203178  |
| 22               | 8                | 0              | -5.095265               | 4.646358 | -2.279341 |
| 23               | 8                | 0              | 0.108539                | 3.724440 | -2.472865 |
| 24               | 8                | 0              | -2.512305               | 3.999972 | -2.694567 |
| 25               | 8                | 0              | -5.386537               | 1.970820 | -2.337315 |
| 26               | 8                | 0              | -1.462950               | 1.567904 | -2.594513 |
| 27               | 8                | 0              | 2.661191                | 4.302702 | -2.651821 |
| 28               | 8                | 0              | -5.866643               | 3.233306 | -0.139144 |
| 29               | 8                | 0              | -1.445972               | 2.942699 | -0.455836 |
| 30               | 8                | 0              | -3.707373               | 0.520443 | -3.782824 |
| 31               | 8                | 0              | -4.977178               | 5.218132 | 1.454901  |
| 32               | 8                | 0              | 0.207537                | 4.284465 | 1.116326  |
| 33               | 8                | 0              | -2.320879               | 5.022608 | 0.920572  |
| 34               | 8                | 0              | -4.987159               | 2.668756 | 2.234728  |
| 35               | 8                | 0              | -1.756114               | 2.708960 | 2.083601  |

|    |    |   |           |           |           |
|----|----|---|-----------|-----------|-----------|
| 36 | 8  | 0 | 2.783304  | 4.698771  | 1.363873  |
| 37 | 14 | 0 | 7.135470  | 0.201604  | 1.089219  |
| 38 | 14 | 0 | 6.990033  | -0.354786 | -1.914139 |
| 39 | 8  | 0 | 6.952002  | -0.591122 | -0.311558 |
| 40 | 14 | 0 | 0.931821  | -2.975586 | 4.138306  |
| 41 | 14 | 0 | -1.116519 | -0.722852 | 4.433306  |
| 42 | 14 | 0 | -5.857998 | -0.675289 | 4.709808  |
| 43 | 14 | 0 | 3.796447  | -4.322115 | -4.226230 |
| 44 | 14 | 0 | -3.613193 | -2.726088 | 4.209471  |
| 45 | 14 | 0 | 6.255310  | -2.371050 | -4.041541 |
| 46 | 14 | 0 | -3.226233 | -5.384392 | -0.903886 |
| 47 | 14 | 0 | -0.143006 | -5.469167 | -1.003577 |
| 48 | 14 | 0 | 0.833089  | -4.084965 | -3.573992 |
| 49 | 14 | 0 | -1.466364 | -2.144846 | -4.268805 |
| 50 | 14 | 0 | -6.398852 | -1.695912 | -4.100346 |
| 51 | 14 | 0 | 3.996617  | -3.148746 | 4.575328  |
| 52 | 14 | 0 | -4.075101 | -3.606023 | -3.264135 |
| 53 | 14 | 0 | 6.347683  | -1.443696 | 3.584962  |
| 54 | 14 | 0 | -3.094806 | -4.867769 | 2.224398  |
| 55 | 14 | 0 | 0.007245  | -5.029519 | 2.110660  |
| 56 | 8  | 0 | 0.167632  | -1.568441 | 3.910790  |
| 57 | 8  | 0 | -1.144081 | 0.601082  | 3.495333  |
| 58 | 8  | 0 | -5.322972 | 0.482564  | 3.672943  |
| 59 | 8  | 0 | -5.035523 | -2.074530 | 4.569451  |
| 60 | 8  | 0 | 4.799908  | -3.048073 | -4.222356 |
| 61 | 8  | 0 | -2.472999 | -1.575068 | 4.216226  |
| 62 | 8  | 0 | -1.694516 | -5.508922 | -1.493366 |
| 63 | 8  | 0 | 0.876505  | -3.799307 | 2.717978  |
| 64 | 8  | 0 | -3.672880 | -3.434104 | 2.734671  |
| 65 | 8  | 0 | 6.315232  | -1.669615 | -2.562480 |
| 66 | 8  | 0 | 2.376919  | -3.681936 | -3.740922 |
| 67 | 8  | 0 | -3.168481 | -4.798642 | 0.606238  |
| 68 | 8  | 0 | -0.003064 | -4.726738 | 0.477698  |
| 69 | 8  | 0 | -0.023142 | -2.744820 | -3.866976 |
| 70 | 8  | 0 | -1.303667 | -0.556291 | -3.931546 |
| 71 | 8  | 0 | -6.304610 | -0.092571 | -3.750933 |
| 72 | 8  | 0 | -5.276681 | -2.519066 | -3.231688 |
| 73 | 8  | 0 | 4.980384  | -2.328020 | 3.573133  |
| 74 | 8  | 0 | -2.630419 | -2.840626 | -3.370835 |
| 75 | 8  | 0 | -1.516537 | -5.048176 | 2.688403  |
| 76 | 8  | 0 | 0.702892  | -4.525001 | -2.001516 |
| 77 | 8  | 0 | -4.120309 | -4.410072 | -1.842891 |
| 78 | 8  | 0 | 6.259595  | -0.535561 | 2.234129  |
| 79 | 8  | 0 | 2.472617  | -2.589471 | 4.410184  |
| 80 | 1  | 0 | 7.618083  | 3.971988  | 1.495857  |
| 81 | 1  | 0 | 7.420095  | 3.174520  | -2.308215 |
| 82 | 1  | 0 | 8.521971  | 0.252727  | 1.469721  |
| 83 | 1  | 0 | 8.361473  | -0.120845 | -2.344939 |
| 84 | 1  | 0 | 7.546647  | -2.259485 | 3.705674  |
| 85 | 1  | 0 | 7.221403  | -3.431472 | -4.005405 |
| 86 | 1  | 0 | 4.176403  | -5.447735 | -3.300648 |
| 87 | 1  | 0 | 4.180320  | -4.531434 | 4.237771  |
| 88 | 1  | 0 | 0.692457  | -6.252775 | 2.458377  |
| 89 | 1  | 0 | 0.443014  | -6.794362 | -0.963330 |
| 90 | 1  | 0 | 4.860445  | 6.247939  | 1.433384  |
| 91 | 1  | 0 | 4.831568  | 5.565098  | -3.181123 |
| 92 | 1  | 0 | 1.258145  | 6.638926  | 1.064173  |
| 93 | 1  | 0 | 0.988407  | 6.147081  | -2.423782 |
| 94 | 1  | 0 | -3.396084 | 7.114332  | 1.394689  |
| 95 | 1  | 0 | -3.360163 | 6.402310  | -2.278066 |

|     |    |   |           |           |           |
|-----|----|---|-----------|-----------|-----------|
| 96  | 1  | 0 | -7.135637 | 4.078511  | 1.841465  |
| 97  | 1  | 0 | -7.321830 | 3.650995  | -2.179841 |
| 98  | 1  | 0 | -7.148773 | -1.107362 | 4.324629  |
| 99  | 1  | 0 | -7.706158 | -2.150147 | -3.706406 |
| 100 | 1  | 0 | -3.809647 | -6.004749 | 2.800031  |
| 101 | 1  | 0 | -3.768898 | -6.707689 | -0.868576 |
| 102 | 1  | 0 | 6.386686  | -0.581584 | 4.730921  |
| 103 | 1  | 0 | 6.442228  | 2.907718  | 3.285149  |
| 104 | 1  | 0 | 4.246004  | -2.963722 | 5.975219  |
| 105 | 1  | 0 | 0.330252  | -3.775924 | 5.226459  |
| 106 | 1  | 0 | -3.375262 | -3.722570 | 5.211169  |
| 107 | 1  | 0 | -0.955273 | -0.424514 | 5.846862  |
| 108 | 1  | 0 | -5.795002 | -0.207436 | 6.087904  |
| 109 | 1  | 0 | -5.532650 | 2.834227  | 4.686572  |
| 110 | 1  | 0 | 1.204815  | 5.405150  | 3.168707  |
| 111 | 1  | 0 | -3.216346 | 5.551526  | 3.291887  |
| 112 | 1  | 0 | -0.936674 | 2.930824  | 4.442829  |
| 113 | 1  | 0 | -3.773870 | 5.261513  | -4.356708 |
| 114 | 1  | 0 | 1.057045  | 4.948787  | -4.461934 |
| 115 | 1  | 0 | -5.439356 | 1.990756  | -4.870070 |
| 116 | 1  | 0 | -1.836515 | 1.633101  | -5.108183 |
| 117 | 1  | 0 | 6.399250  | 2.580354  | -4.386474 |
| 118 | 1  | 0 | -6.181839 | -1.918627 | -5.532155 |
| 119 | 1  | 0 | -4.226841 | -4.543956 | -4.381658 |
| 120 | 1  | 0 | 0.375404  | -5.148687 | -4.477687 |
| 121 | 1  | 0 | 3.618475  | -4.645207 | -5.633990 |
| 122 | 1  | 0 | 6.473960  | -1.397798 | -5.118927 |
| 123 | 1  | 0 | -1.732043 | -2.275511 | -5.685471 |
| 124 | 14 | 0 | -1.324681 | 3.122759  | -2.051546 |
| 125 | 79 | 0 | -0.461497 | -0.105704 | -1.185574 |
| 126 | 79 | 0 | 0.204315  | -2.277094 | 0.124144  |
| 127 | 79 | 0 | 0.929435  | 0.130989  | 1.113574  |
| 128 | 6  | 0 | 3.334015  | 1.586294  | 4.432766  |
| 129 | 1  | 0 | 4.402697  | 1.729945  | 4.619432  |
| 130 | 1  | 0 | 2.792809  | 2.457794  | 4.810917  |
| 131 | 1  | 0 | 3.003363  | 0.701463  | 4.984202  |
| 132 | 6  | 0 | 3.091747  | 1.398301  | 2.937648  |
| 133 | 1  | 0 | 3.414062  | 2.302543  | 2.380665  |
| 134 | 1  | 0 | 3.653372  | 0.561430  | 2.504507  |
| 135 | 8  | 0 | 1.728736  | 1.297459  | 2.654742  |
| 136 | 8  | 0 | 3.482016  | 1.007743  | -0.980555 |
| 137 | 8  | 0 | 3.809808  | 0.126107  | -0.040742 |
| 138 | 1  | 0 | 4.297822  | 1.122360  | -1.524659 |

-----  
Zero-point correction= 0.393005 (Hartree/Particle)  
Thermal correction to Energy= 0.480857  
Thermal correction to Enthalpy= 0.481801  
Thermal correction to Gibbs Free Energy= 0.277080  
Sum of electronic and zero-point Energies= -14045.118987  
Sum of electronic and thermal Energies= -14045.031135  
Sum of electronic and thermal Enthalpies= -14045.030191  
Sum of electronic and thermal Free Energies= -14045.234912

M06-L/def2-TZVP//b3lyp/6-31G(d,p)-LANL2DZ Single point energy: -14048.5015541

## INT6

**Charge: 1 multiplicity: 1**

-----  
Center Atomic Atomic Coordinates (Angstroms)

| Number | Number | Type | X         | Y         | Z         |
|--------|--------|------|-----------|-----------|-----------|
| 1      | 14     | 0    | 3.663484  | 5.345528  | 1.047785  |
| 2      | 14     | 0    | 5.939559  | 3.549979  | 2.189251  |
| 3      | 14     | 0    | 3.791617  | 4.872211  | -2.052379 |
| 4      | 14     | 0    | 6.032189  | 2.857821  | -2.552677 |
| 5      | 8      | 0    | 4.529649  | 4.098485  | 1.614967  |
| 6      | 8      | 0    | 6.197380  | 2.176044  | 1.337013  |
| 7      | 8      | 0    | 3.792760  | 5.547446  | -0.564414 |
| 8      | 8      | 0    | 4.611562  | 3.464074  | -2.050043 |
| 9      | 8      | 0    | 5.901111  | 1.264349  | -2.096855 |
| 10     | 14     | 0    | -2.321366 | 2.096103  | 3.487533  |
| 11     | 14     | 0    | -5.384768 | 1.843699  | 3.447600  |
| 12     | 14     | 0    | -6.287322 | 3.029931  | -2.108311 |
| 13     | 14     | 0    | -4.028267 | 4.908580  | -3.163694 |
| 14     | 14     | 0    | 0.806871  | 4.874088  | -2.987815 |
| 15     | 14     | 0    | -2.173455 | 0.695122  | -3.995894 |
| 16     | 14     | 0    | -5.296574 | 0.793723  | -3.987765 |
| 17     | 14     | 0    | -6.325016 | 3.522685  | 1.012617  |
| 18     | 14     | 0    | -4.162189 | 5.603517  | 1.579345  |
| 19     | 14     | 0    | 0.647247  | 5.456625  | 1.733705  |
| 20     | 14     | 0    | -1.844119 | 3.714649  | 0.831632  |
| 21     | 8      | 0    | -3.852639 | 1.947420  | 4.023716  |
| 22     | 8      | 0    | -5.455553 | 4.335445  | -2.615539 |
| 23     | 8      | 0    | -0.196048 | 3.706928  | -2.452104 |
| 24     | 8      | 0    | -2.793173 | 3.900933  | -2.803689 |
| 25     | 8      | 0    | -5.589170 | 1.646619  | -2.631827 |
| 26     | 8      | 0    | -1.698777 | 1.499342  | -2.669257 |
| 27     | 8      | 0    | 2.308954  | 4.448864  | -2.522715 |
| 28     | 8      | 0    | -6.269602 | 2.926418  | -0.490078 |
| 29     | 8      | 0    | -1.813372 | 2.853915  | -0.526302 |
| 30     | 8      | 0    | -3.748999 | 0.251337  | -3.969426 |
| 31     | 8      | 0    | -5.616053 | 4.992776  | 1.131107  |
| 32     | 8      | 0    | -0.385346 | 4.369102  | 1.100624  |
| 33     | 8      | 0    | -2.935563 | 4.910603  | 0.728056  |
| 34     | 8      | 0    | -5.495699 | 2.461196  | 1.947108  |
| 35     | 8      | 0    | -2.291999 | 2.682986  | 1.988900  |
| 36     | 8      | 0    | 2.165161  | 4.909265  | 1.496688  |
| 37     | 14     | 0    | 6.780485  | 0.677694  | 1.548135  |
| 38     | 14     | 0    | 6.841859  | 0.067637  | -1.464736 |
| 39     | 8      | 0    | 6.673575  | -0.119048 | 0.136786  |
| 40     | 14     | 0    | 0.602829  | -2.815265 | 4.295603  |
| 41     | 14     | 0    | -1.572035 | -0.677593 | 4.421706  |
| 42     | 14     | 0    | -6.329904 | -0.897792 | 4.425424  |
| 43     | 14     | 0    | 4.017247  | -4.131806 | -3.863784 |
| 44     | 14     | 0    | -3.935221 | -2.829541 | 4.094032  |
| 45     | 14     | 0    | 6.355895  | -2.030171 | -3.577387 |
| 46     | 14     | 0    | -3.111284 | -5.538819 | -0.941442 |
| 47     | 14     | 0    | -0.019541 | -5.444803 | -0.850162 |
| 48     | 14     | 0    | 1.006983  | -4.044179 | -3.392566 |
| 49     | 14     | 0    | -1.343922 | -2.233583 | -4.254575 |
| 50     | 14     | 0    | -6.292596 | -2.086035 | -4.377071 |
| 51     | 14     | 0    | 3.642899  | -2.810217 | 4.910927  |
| 52     | 14     | 0    | -3.910466 | -3.843129 | -3.380541 |
| 53     | 14     | 0    | 5.948281  | -0.985787 | 4.022283  |
| 54     | 14     | 0    | -3.194874 | -4.971360 | 2.178074  |
| 55     | 14     | 0    | -0.081139 | -4.953548 | 2.246890  |
| 56     | 8      | 0    | -0.193399 | -1.435767 | 4.007335  |
| 57     | 8      | 0    | -1.590601 | 0.636218  | 3.467445  |
| 58     | 8      | 0    | -5.820502 | 0.272837  | 3.392739  |

|     |   |   |           |           |           |
|-----|---|---|-----------|-----------|-----------|
| 59  | 8 | 0 | -5.398772 | -2.233705 | 4.365794  |
| 60  | 8 | 0 | 4.922090  | -2.770367 | -3.799928 |
| 61  | 8 | 0 | -2.840453 | -1.631038 | 4.124129  |
| 62  | 8 | 0 | -1.534463 | -5.578413 | -1.422316 |
| 63  | 8 | 0 | 0.670232  | -3.665218 | 2.895334  |
| 64  | 8 | 0 | -3.879741 | -3.567260 | 2.635022  |
| 65  | 8 | 0 | 6.280101  | -1.308340 | -2.106962 |
| 66  | 8 | 0 | 2.543171  | -3.539950 | -3.483370 |
| 67  | 8 | 0 | -3.182692 | -4.929426 | 0.559847  |
| 68  | 8 | 0 | 0.022078  | -4.666733 | 0.616671  |
| 69  | 8 | 0 | 0.109769  | -2.760394 | -3.753797 |
| 70  | 8 | 0 | -1.272571 | -0.649314 | -3.961857 |
| 71  | 8 | 0 | -6.314041 | -0.478013 | -4.052524 |
| 72  | 8 | 0 | -5.176013 | -2.834701 | -3.432770 |
| 73  | 8 | 0 | 4.630959  | -1.940246 | 3.952709  |
| 74  | 8 | 0 | -2.499941 | -3.013967 | -3.408778 |
| 75  | 8 | 0 | -1.634089 | -5.053782 | 2.725675  |
| 76  | 8 | 0 | 0.843508  | -4.476713 | -1.819466 |
| 77  | 8 | 0 | -3.997299 | -4.637177 | -1.950980 |
| 78  | 8 | 0 | 5.890294  | -0.116370 | 2.643886  |
| 79  | 8 | 0 | 2.104319  | -2.343442 | 4.649933  |
| 80  | 1 | 0 | 7.026510  | 4.463393  | 1.909920  |
| 81  | 1 | 0 | 7.097567  | 3.596955  | -1.883683 |
| 82  | 1 | 0 | 8.140905  | 0.802810  | 2.005781  |
| 83  | 1 | 0 | 8.225701  | 0.361532  | -1.804090 |
| 84  | 1 | 0 | 7.180969  | -1.726815 | 4.228729  |
| 85  | 1 | 0 | 7.375289  | -3.034924 | -3.464830 |
| 86  | 1 | 0 | 4.414070  | -5.213143 | -2.898776 |
| 87  | 1 | 0 | 3.924171  | -4.181568 | 4.608744  |
| 88  | 1 | 0 | 0.650385  | -6.129653 | 2.664164  |
| 89  | 1 | 0 | 0.632891  | -6.737527 | -0.755434 |
| 90  | 1 | 0 | 4.152279  | 6.574453  | 1.645670  |
| 91  | 1 | 0 | 4.432617  | 5.819631  | -2.949046 |
| 92  | 1 | 0 | 0.561280  | 6.750176  | 1.062389  |
| 93  | 1 | 0 | 0.524811  | 6.189555  | -2.425399 |
| 94  | 1 | 0 | -4.123798 | 6.960020  | 1.115329  |
| 95  | 1 | 0 | -3.832282 | 6.194513  | -2.535189 |
| 96  | 1 | 0 | -7.704077 | 3.719788  | 1.403073  |
| 97  | 1 | 0 | -7.629735 | 3.219996  | -2.613516 |
| 98  | 1 | 0 | -7.567178 | -1.419054 | 3.978537  |
| 99  | 1 | 0 | -7.592835 | -2.616603 | -4.050210 |
| 100 | 1 | 0 | -3.870889 | -6.137612 | 2.741204  |
| 101 | 1 | 0 | -3.575335 | -6.893743 | -0.905044 |
| 102 | 1 | 0 | 5.869247  | -0.103312 | 5.153708  |
| 103 | 1 | 0 | 5.810604  | 3.360397  | 3.648124  |
| 104 | 1 | 0 | 3.798555  | -2.585983 | 6.317274  |
| 105 | 1 | 0 | -0.014001 | -3.635302 | 5.359673  |
| 106 | 1 | 0 | -3.709241 | -3.797041 | 5.129991  |
| 107 | 1 | 0 | -1.522488 | -0.354863 | 5.841818  |
| 108 | 1 | 0 | -6.372490 | -0.414994 | 5.799593  |
| 109 | 1 | 0 | -6.202215 | 2.614721  | 4.358694  |
| 110 | 1 | 0 | 0.455178  | 5.548066  | 3.183233  |
| 111 | 1 | 0 | -3.966767 | 5.439796  | 3.048813  |
| 112 | 1 | 0 | -1.612853 | 2.973767  | 4.378245  |
| 113 | 1 | 0 | -4.057872 | 4.999621  | -4.612451 |
| 114 | 1 | 0 | 0.780887  | 4.965830  | -4.433286 |
| 115 | 1 | 0 | -5.501396 | 1.630258  | -5.159166 |
| 116 | 1 | 0 | -1.876169 | 1.478224  | -5.182474 |
| 117 | 1 | 0 | 6.235739  | 2.912514  | -4.005738 |
| 118 | 1 | 0 | -5.979860 | -2.325398 | -5.789180 |

|     |    |   |           |           |           |
|-----|----|---|-----------|-----------|-----------|
| 119 | 1  | 0 | -3.949227 | -4.814869 | -4.478804 |
| 120 | 1  | 0 | 0.677673  | -5.153208 | -4.298206 |
| 121 | 1  | 0 | 3.948977  | -4.480533 | -5.275071 |
| 122 | 1  | 0 | 6.579729  | -1.065482 | -4.657641 |
| 123 | 1  | 0 | -1.515632 | -2.426046 | -5.679197 |
| 124 | 14 | 0 | -1.623941 | 3.016735  | -2.123888 |
| 125 | 79 | 0 | 1.998516  | -0.422865 | -1.222480 |
| 126 | 79 | 0 | 0.783108  | -2.262583 | 0.260116  |
| 127 | 79 | 0 | 1.055133  | 0.187248  | 1.269023  |
| 128 | 6  | 0 | 2.842240  | 1.286765  | 4.129439  |
| 129 | 1  | 0 | 2.971649  | 0.404196  | 3.500963  |
| 130 | 1  | 0 | 2.558199  | 0.979513  | 5.144934  |
| 131 | 1  | 0 | 4.190027  | 0.722614  | -2.550634 |
| 132 | 6  | 0 | 1.789160  | 2.194743  | 3.605966  |
| 133 | 1  | 0 | 3.783929  | 1.839053  | 4.224351  |
| 134 | 1  | 0 | 1.646869  | 3.152822  | 4.133768  |
| 135 | 8  | 0 | 1.048795  | 1.969417  | 2.652545  |
| 136 | 1  | 0 | 3.514231  | -1.158699 | -3.801782 |
| 137 | 8  | 0 | 3.277018  | 0.493617  | -2.844855 |
| 138 | 8  | 0 | 3.500453  | -0.223351 | -4.087460 |

-----

Zero-point correction= 0.395705 (Hartree/Particle)  
Thermal correction to Energy= 0.483220  
Thermal correction to Enthalpy= 0.484164  
Thermal correction to Gibbs Free Energy= 0.281745  
Sum of electronic and zero-point Energies= -14045.214097  
Sum of electronic and thermal Energies= -14045.126582  
Sum of electronic and thermal Enthalpies= -14045.125638  
Sum of electronic and thermal Free Energies= -14045.328057

M06-L/def2-TZVP//b3lyp/6-31G(d,p)-LANL2DZ Single point energy: -14048.5873605

### INT3a

**Charge: 1 multiplicity: 3**

-----

| Center<br>Number | Atomic<br>Number | Atomic<br>Type | Coordinates (Angstroms) |          |           |
|------------------|------------------|----------------|-------------------------|----------|-----------|
|                  |                  |                | X                       | Y        | Z         |
| 1                | 14               | 0              | 4.300953                | 5.071405 | 0.754302  |
| 2                | 14               | 0              | 6.545396                | 3.131835 | 1.705435  |
| 3                | 14               | 0              | 4.180974                | 4.635722 | -2.348097 |
| 4                | 14               | 0              | 6.249509                | 2.494198 | -3.032703 |
| 5                | 8                | 0              | 5.128963                | 3.770313 | 1.244057  |
| 6                | 8                | 0              | 6.674846                | 1.767369 | 0.818368  |
| 7                | 8                | 0              | 4.304754                | 5.301031 | -0.858019 |
| 8                | 8                | 0              | 4.908578                | 3.197274 | -2.428955 |
| 9                | 8                | 0              | 6.108822                | 0.933549 | -2.574453 |
| 10               | 14               | 0              | -1.677087               | 2.123752 | 3.596437  |
| 11               | 14               | 0              | -4.748507               | 2.060632 | 3.772899  |
| 12               | 14               | 0              | -5.988215               | 3.382095 | -1.673856 |
| 13               | 14               | 0              | -3.717188               | 5.144307 | -2.882130 |
| 14               | 14               | 0              | 1.145904                | 4.841597 | -3.065782 |
| 15               | 14               | 0              | -2.181894               | 0.839930 | -3.915374 |
| 16               | 14               | 0              | -5.285300               | 1.125840 | -3.650496 |
| 17               | 14               | 0              | -5.761596               | 3.828339 | 1.440110  |
| 18               | 14               | 0              | -3.444865               | 5.767777 | 1.872366  |
| 19               | 14               | 0              | 1.358927                | 5.344296 | 1.671173  |
| 20               | 14               | 0              | -1.288249               | 3.759540 | 0.940215  |
| 21               | 8                | 0              | -3.175249               | 2.059720 | 4.232948  |

|    |    |   |           |           |           |
|----|----|---|-----------|-----------|-----------|
| 22 | 8  | 0 | -5.124984 | 4.649506  | -2.225745 |
| 23 | 8  | 0 | 0.081448  | 3.730532  | -2.496019 |
| 24 | 8  | 0 | -2.544160 | 4.014472  | -2.665452 |
| 25 | 8  | 0 | -5.409402 | 1.970443  | -2.267702 |
| 26 | 8  | 0 | -1.518704 | 1.584707  | -2.595072 |
| 27 | 8  | 0 | 2.633097  | 4.313115  | -2.710284 |
| 28 | 8  | 0 | -5.853799 | 3.244437  | -0.067042 |
| 29 | 8  | 0 | -1.437512 | 2.950258  | -0.452904 |
| 30 | 8  | 0 | -3.762375 | 0.508715  | -3.747050 |
| 31 | 8  | 0 | -4.958505 | 5.251679  | 1.506673  |
| 32 | 8  | 0 | 0.228583  | 4.297408  | 1.109220  |
| 33 | 8  | 0 | -2.312800 | 5.016320  | 0.940202  |
| 34 | 8  | 0 | -4.916648 | 2.715292  | 2.293871  |
| 35 | 8  | 0 | -1.703428 | 2.706733  | 2.091114  |
| 36 | 8  | 0 | 2.812952  | 4.714910  | 1.310042  |
| 37 | 14 | 0 | 7.172460  | 0.229371  | 0.948561  |
| 38 | 14 | 0 | 6.969614  | -0.338723 | -2.049674 |
| 39 | 8  | 0 | 6.945571  | -0.566677 | -0.435915 |
| 40 | 14 | 0 | 1.027371  | -2.949440 | 4.129364  |
| 41 | 14 | 0 | -0.994468 | -0.708720 | 4.442092  |
| 42 | 14 | 0 | -5.770093 | -0.633865 | 4.783858  |
| 43 | 14 | 0 | 3.754070  | -4.314921 | -4.285128 |
| 44 | 14 | 0 | -3.495574 | -2.721387 | 4.242059  |
| 45 | 14 | 0 | 6.211903  | -2.360518 | -4.136659 |
| 46 | 14 | 0 | -3.222124 | -5.379998 | -0.860738 |
| 47 | 14 | 0 | -0.143357 | -5.465663 | -1.005861 |
| 48 | 14 | 0 | 0.798594  | -4.081310 | -3.588471 |
| 49 | 14 | 0 | -1.516178 | -2.145238 | -4.249388 |
| 50 | 14 | 0 | -6.448391 | -1.698952 | -4.006542 |
| 51 | 14 | 0 | 4.110867  | -3.128054 | 4.506917  |
| 52 | 14 | 0 | -4.109531 | -3.604121 | -3.204499 |
| 53 | 14 | 0 | 6.429304  | -1.404970 | 3.468891  |
| 54 | 14 | 0 | -3.051528 | -4.862917 | 2.262864  |
| 55 | 14 | 0 | 0.042323  | -5.014696 | 2.114169  |
| 56 | 8  | 0 | 0.392821  | -1.449540 | 3.983101  |
| 57 | 8  | 0 | -1.060722 | 0.614764  | 3.509799  |
| 58 | 8  | 0 | -5.303056 | 0.529791  | 3.723189  |
| 59 | 8  | 0 | -4.850677 | -1.966563 | 4.636834  |
| 60 | 8  | 0 | 4.753354  | -3.042311 | -4.301307 |
| 61 | 8  | 0 | -2.244478 | -1.685905 | 4.171341  |
| 62 | 8  | 0 | -1.701163 | -5.507651 | -1.474662 |
| 63 | 8  | 0 | 0.877103  | -3.750075 | 2.710722  |
| 64 | 8  | 0 | -3.648793 | -3.439316 | 2.782459  |
| 65 | 8  | 0 | 6.305928  | -1.686492 | -2.649868 |
| 66 | 8  | 0 | 2.337633  | -3.680310 | -3.777133 |
| 67 | 8  | 0 | -3.136143 | -4.790365 | 0.648082  |
| 68 | 8  | 0 | 0.004540  | -4.728603 | 0.480722  |
| 69 | 8  | 0 | -0.068432 | -2.744074 | -3.865939 |
| 70 | 8  | 0 | -1.357864 | -0.555455 | -3.910724 |
| 71 | 8  | 0 | -6.357755 | -0.094528 | -3.660259 |
| 72 | 8  | 0 | -5.310388 | -2.517223 | -3.153258 |
| 73 | 8  | 0 | 5.060261  | -2.293445 | 3.489378  |
| 74 | 8  | 0 | -2.666371 | -2.841877 | -3.332752 |
| 75 | 8  | 0 | -1.470573 | -5.042509 | 2.718121  |
| 76 | 8  | 0 | 0.688910  | -4.521391 | -2.011604 |
| 77 | 8  | 0 | -4.135091 | -4.407432 | -1.780933 |
| 78 | 8  | 0 | 6.301486  | -0.500534 | 2.119083  |
| 79 | 8  | 0 | 2.581049  | -2.586325 | 4.346337  |
| 80 | 1  | 0 | 7.649686  | 3.993677  | 1.358310  |
| 81 | 1  | 0 | 7.393469  | 3.187015  | -2.440346 |

|     |    |   |           |           |           |
|-----|----|---|-----------|-----------|-----------|
| 82  | 1  | 0 | 8.556865  | 0.275265  | 1.326889  |
| 83  | 1  | 0 | 8.337465  | -0.107518 | -2.483930 |
| 84  | 1  | 0 | 7.618939  | -2.232572 | 3.583647  |
| 85  | 1  | 0 | 7.175021  | -3.423175 | -4.118653 |
| 86  | 1  | 0 | 4.143362  | -5.440690 | -3.361878 |
| 87  | 1  | 0 | 4.263566  | -4.506492 | 4.173385  |
| 88  | 1  | 0 | 0.750182  | -6.235418 | 2.452509  |
| 89  | 1  | 0 | 0.448121  | -6.785378 | -0.963626 |
| 90  | 1  | 0 | 4.889246  | 6.266908  | 1.333354  |
| 91  | 1  | 0 | 4.789295  | 5.573011  | -3.278532 |
| 92  | 1  | 0 | 1.281214  | 6.653520  | 1.019240  |
| 93  | 1  | 0 | 0.957793  | 6.153097  | -2.462899 |
| 94  | 1  | 0 | -3.367763 | 7.125188  | 1.420995  |
| 95  | 1  | 0 | -3.388238 | 6.404485  | -2.250184 |
| 96  | 1  | 0 | -7.096883 | 4.086837  | 1.933027  |
| 97  | 1  | 0 | -7.345147 | 3.649598  | -2.083879 |
| 98  | 1  | 0 | -7.066226 | -1.093135 | 4.428319  |
| 99  | 1  | 0 | -7.747361 | -2.155520 | -3.590596 |
| 100 | 1  | 0 | -3.746316 | -5.990913 | 2.863541  |
| 101 | 1  | 0 | -3.761905 | -6.702521 | -0.803589 |
| 102 | 1  | 0 | 6.473382  | -0.553360 | 4.622848  |
| 103 | 1  | 0 | 6.503071  | 2.932507  | 3.168177  |
| 104 | 1  | 0 | 4.354687  | -2.934598 | 5.905897  |
| 105 | 1  | 0 | 0.428580  | -3.752344 | 5.220035  |
| 106 | 1  | 0 | -3.276774 | -3.702597 | 5.262242  |
| 107 | 1  | 0 | -0.850493 | -0.400712 | 5.852448  |
| 108 | 1  | 0 | -5.686103 | -0.187723 | 6.168203  |
| 109 | 1  | 0 | -5.448612 | 2.850855  | 4.755791  |
| 110 | 1  | 0 | 1.261866  | 5.424647  | 3.127276  |
| 111 | 1  | 0 | -3.156989 | 5.567066  | 3.318851  |
| 112 | 1  | 0 | -0.857081 | 2.951299  | 4.440383  |
| 113 | 1  | 0 | -3.833072 | 5.258360  | -4.319445 |
| 114 | 1  | 0 | 0.995933  | 4.950039  | -4.499044 |
| 115 | 1  | 0 | -5.503066 | 1.984790  | -4.799132 |
| 116 | 1  | 0 | -1.904007 | 1.630040  | -5.092394 |
| 117 | 1  | 0 | 6.341033  | 2.586934  | -4.501076 |
| 118 | 1  | 0 | -6.251845 | -1.926866 | -5.440368 |
| 119 | 1  | 0 | -4.276570 | -4.547574 | -4.314220 |
| 120 | 1  | 0 | 0.324225  | -5.148097 | -4.480373 |
| 121 | 1  | 0 | 3.548424  | -4.644242 | -5.688150 |
| 122 | 1  | 0 | 6.408324  | -1.392871 | -5.225213 |
| 123 | 1  | 0 | -1.804615 | -2.279827 | -5.662017 |
| 124 | 14 | 0 | -1.343702 | 3.134753  | -2.052373 |
| 125 | 79 | 0 | -0.537136 | -0.100969 | -1.219048 |
| 126 | 79 | 0 | 0.097228  | -2.312353 | 0.075712  |
| 127 | 79 | 0 | 0.909560  | 0.100472  | 1.006456  |
| 128 | 6  | 0 | 3.728705  | 1.321893  | 4.596413  |
| 129 | 1  | 0 | 4.743544  | 1.726727  | 4.596176  |
| 130 | 1  | 0 | 3.126969  | 1.929394  | 5.291829  |
| 131 | 1  | 0 | 3.769239  | 0.304153  | 5.002280  |
| 132 | 6  | 0 | 3.162498  | 1.347412  | 3.218318  |
| 133 | 1  | 0 | 3.273578  | 2.215967  | 2.573996  |
| 134 | 1  | 0 | 4.079396  | 0.434619  | 1.484844  |
| 135 | 8  | 0 | 1.918264  | 0.763895  | 3.038855  |
| 136 | 8  | 0 | 3.029939  | 1.117058  | 0.100468  |
| 137 | 8  | 0 | 4.040518  | 0.338475  | 0.495998  |
| 138 | 1  | 0 | 1.765657  | -0.004392 | 3.621529  |

-----  
Zero-point correction= 0.393613 (Hartree/Particle)  
Thermal correction to Energy= 0.477250



Thermal correction to Enthalpy= 0.478994  
 Thermal correction to Gibbs Free Energy= 0.279061  
 Sum of electronic and zero-point Energies= -14045.111616  
 Sum of electronic and thermal Energies= -14045.027979  
 Sum of electronic and thermal Enthalpies= -14045.026235  
 Sum of electronic and thermal Free Energies= -14045.226168  
 M06-L/def2-TZVP//b3lyp/6-31G(d,p)-LANL2DZ Single point energy: -14048.492639

### INT3b

**Charge: 1 multiplicity: 3**

| Center Number | Atomic Number | Atomic Type | Coordinates (Angstroms) |           |           |
|---------------|---------------|-------------|-------------------------|-----------|-----------|
|               |               |             | X                       | Y         | Z         |
| 1             | 14            | 0           | 3.480317                | 5.431010  | 0.921789  |
| 2             | 14            | 0           | 5.828223                | 3.735172  | 2.100156  |
| 3             | 14            | 0           | 3.576936                | 4.853758  | -2.147900 |
| 4             | 14            | 0           | 5.869548                | 2.895297  | -2.617383 |
| 5             | 8             | 0           | 4.422897                | 4.234822  | 1.466372  |
| 6             | 8             | 0           | 6.109351                | 2.330512  | 1.298585  |
| 7             | 8             | 0           | 3.545814                | 5.605263  | -0.698890 |
| 8             | 8             | 0           | 4.441342                | 3.480789  | -2.102040 |
| 9             | 8             | 0           | 5.842743                | 1.329649  | -2.119756 |
| 10            | 14            | 0           | -2.365739               | 2.050988  | 3.581567  |
| 11            | 14            | 0           | -5.422105               | 1.690885  | 3.590743  |
| 12            | 14            | 0           | -6.447906               | 2.686180  | -1.979331 |
| 13            | 14            | 0           | -4.268668               | 4.590759  | -3.139834 |
| 14            | 14            | 0           | 0.589748                | 4.738316  | -3.039725 |
| 15            | 14            | 0           | -2.277537               | 0.423189  | -3.870518 |
| 16            | 14            | 0           | -5.414665               | 0.427854  | -3.806759 |
| 17            | 14            | 0           | -6.446013               | 3.265699  | 1.121737  |
| 18            | 14            | 0           | -4.336841               | 5.438963  | 1.582998  |
| 19            | 14            | 0           | 0.478659                | 5.448211  | 1.673368  |
| 20            | 14            | 0           | -1.962910               | 3.600700  | 0.875216  |
| 21            | 8             | 0           | -3.885715               | 1.867691  | 4.131696  |
| 22            | 8             | 0           | -5.665619               | 4.003330  | -2.539970 |
| 23            | 8             | 0           | -0.397361               | 3.570899  | -2.459303 |
| 24            | 8             | 0           | -3.021406               | 3.566252  | -2.802998 |
| 25            | 8             | 0           | -5.709166               | 1.313657  | -2.478175 |
| 26            | 8             | 0           | -1.704342               | 1.266195  | -2.568953 |
| 27            | 8             | 0           | 2.100872                | 4.351252  | -2.587957 |
| 28            | 8             | 0           | -6.399808               | 2.621566  | -0.364259 |
| 29            | 8             | 0           | -1.952429               | 2.708450  | -0.477627 |
| 30            | 8             | 0           | -3.831038               | -0.031336 | -3.766497 |
| 31            | 8             | 0           | -5.764194               | 4.753035  | 1.158318  |
| 32            | 8             | 0           | -0.501203               | 4.272542  | 1.082473  |
| 33            | 8             | 0           | -3.076106               | 4.774192  | 0.750617  |
| 34            | 8             | 0           | -5.572475               | 2.259990  | 2.071350  |
| 35            | 8             | 0           | -2.364989               | 2.575500  | 2.050272  |
| 36            | 8             | 0           | 2.006800                | 4.939758  | 1.401647  |
| 37            | 14            | 0           | 6.752726                | 0.862233  | 1.538567  |
| 38            | 14            | 0           | 6.784692                | 0.193707  | -1.459978 |
| 39            | 8             | 0           | 6.636246                | 0.012706  | 0.149615  |
| 40            | 14            | 0           | 0.725468                | -2.745611 | 4.469097  |
| 41            | 14            | 0           | -1.518252               | -0.676509 | 4.584741  |
| 42            | 14            | 0           | -6.257199               | -1.048020 | 4.665799  |
| 43            | 14            | 0           | 4.060046                | -4.195306 | -3.678083 |
| 44            | 14            | 0           | -3.812259               | -2.905676 | 4.349109  |

|     |    |   |           |           |           |
|-----|----|---|-----------|-----------|-----------|
| 45  | 14 | 0 | 6.333620  | -2.014416 | -3.496414 |
| 46  | 14 | 0 | -2.939516 | -5.744771 | -0.598801 |
| 47  | 14 | 0 | 0.112252  | -5.542784 | -0.549385 |
| 48  | 14 | 0 | 1.061550  | -4.207132 | -3.142266 |
| 49  | 14 | 0 | -1.360288 | -2.509071 | -4.042777 |
| 50  | 14 | 0 | -6.306206 | -2.512901 | -4.096433 |
| 51  | 14 | 0 | 3.763910  | -2.607515 | 5.055607  |
| 52  | 14 | 0 | -3.865932 | -4.164578 | -3.065983 |
| 53  | 14 | 0 | 6.001313  | -0.745493 | 4.080926  |
| 54  | 14 | 0 | -2.997440 | -5.076033 | 2.511380  |
| 55  | 14 | 0 | 0.087219  | -4.952197 | 2.517117  |
| 56  | 8  | 0 | -0.138386 | -1.408838 | 4.142055  |
| 57  | 8  | 0 | -1.588245 | 0.608483  | 3.571323  |
| 58  | 8  | 0 | -5.805210 | 0.108457  | 3.586836  |
| 59  | 8  | 0 | -5.298890 | -2.362448 | 4.625619  |
| 60  | 8  | 0 | 4.948391  | -2.827373 | -3.648588 |
| 61  | 8  | 0 | -2.788343 | -1.642974 | 4.339582  |
| 62  | 8  | 0 | -1.393558 | -5.744529 | -1.160776 |
| 63  | 8  | 0 | 0.829319  | -3.626934 | 3.101608  |
| 64  | 8  | 0 | -3.750070 | -3.682397 | 2.912276  |
| 65  | 8  | 0 | 6.238597  | -1.259591 | -2.012380 |
| 66  | 8  | 0 | 2.574137  | -3.651835 | -3.283779 |
| 67  | 8  | 0 | -2.995898 | -5.102227 | 0.888336  |
| 68  | 8  | 0 | 0.068828  | -4.803294 | 0.896178  |
| 69  | 8  | 0 | 0.112810  | -2.958354 | -3.549270 |
| 70  | 8  | 0 | -1.324936 | -0.893353 | -3.773366 |
| 71  | 8  | 0 | -6.358771 | -0.892742 | -3.822449 |
| 72  | 8  | 0 | -5.165393 | -3.198534 | -3.140145 |
| 73  | 8  | 0 | 4.714143  | -1.737821 | 4.053272  |
| 74  | 8  | 0 | -2.504219 | -3.252145 | -3.165498 |
| 75  | 8  | 0 | -1.449201 | -5.059454 | 3.083410  |
| 76  | 8  | 0 | 0.929941  | -4.566870 | -1.561249 |
| 77  | 8  | 0 | -3.892078 | -4.895445 | -1.609349 |
| 78  | 8  | 0 | 5.906314  | 0.058057  | 2.658275  |
| 79  | 8  | 0 | 2.210261  | -2.194097 | 4.798251  |
| 80  | 1  | 0 | 6.875466  | 4.675414  | 1.775297  |
| 81  | 1  | 0 | 6.920826  | 3.691955  | -1.989938 |
| 82  | 1  | 0 | 8.111631  | 1.058050  | 1.968388  |
| 83  | 1  | 0 | 8.156468  | 0.499217  | -1.826676 |
| 84  | 1  | 0 | 7.267952  | -1.429711 | 4.283681  |
| 85  | 1  | 0 | 7.395321  | -2.974127 | -3.367331 |
| 86  | 1  | 0 | 4.516273  | -5.228812 | -2.688148 |
| 87  | 1  | 0 | 4.100028  | -3.976215 | 4.790143  |
| 88  | 1  | 0 | 0.865129  | -6.090835 | 2.957850  |
| 89  | 1  | 0 | 0.818706  | -6.807146 | -0.440434 |
| 90  | 1  | 0 | 3.929309  | 6.682116  | 1.489657  |
| 91  | 1  | 0 | 4.168773  | 5.791582  | -3.083153 |
| 92  | 1  | 0 | 0.326562  | 6.721920  | 0.956262  |
| 93  | 1  | 0 | 0.258680  | 6.050080  | -2.511336 |
| 94  | 1  | 0 | -4.361672 | 6.780273  | 1.074569  |
| 95  | 1  | 0 | -4.097225 | 5.909350  | -2.554343 |
| 96  | 1  | 0 | -7.828175 | 3.435630  | 1.518278  |
| 97  | 1  | 0 | -7.794867 | 2.811426  | -2.481393 |
| 98  | 1  | 0 | -7.484351 | -1.611753 | 4.250480  |
| 99  | 1  | 0 | -7.585297 | -3.063479 | -3.735584 |
| 100 | 1  | 0 | -3.651883 | -6.243905 | 3.104494  |
| 101 | 1  | 0 | -3.383722 | -7.105304 | -0.520431 |
| 102 | 1  | 0 | 5.916585  | 0.178584  | 5.177634  |
| 103 | 1  | 0 | 5.721764  | 3.589144  | 3.565657  |
| 104 | 1  | 0 | 3.946148  | -2.332261 | 6.449788  |

|     |    |   |           |           |           |
|-----|----|---|-----------|-----------|-----------|
| 105 | 1  | 0 | 0.157079  | -3.535392 | 5.584012  |
| 106 | 1  | 0 | -3.533645 | -3.824786 | 5.416260  |
| 107 | 1  | 0 | -1.452034 | -0.292089 | 5.986706  |
| 108 | 1  | 0 | -6.297586 | -0.512036 | 6.020760  |
| 109 | 1  | 0 | -6.248360 | 2.474472  | 4.483570  |
| 110 | 1  | 0 | 0.290705  | 5.584840  | 3.114979  |
| 111 | 1  | 0 | -4.126708 | 5.328062  | 3.051937  |
| 112 | 1  | 0 | -1.673564 | 2.983541  | 4.421350  |
| 113 | 1  | 0 | -4.312911 | 4.642391  | -4.589525 |
| 114 | 1  | 0 | 0.526439  | 4.772350  | -4.483735 |
| 115 | 1  | 0 | -5.651729 | 1.212105  | -5.008575 |
| 116 | 1  | 0 | -2.024151 | 1.177831  | -5.082782 |
| 117 | 1  | 0 | 6.051824  | 2.912791  | -4.076104 |
| 118 | 1  | 0 | -6.007913 | -2.775060 | -5.507361 |
| 119 | 1  | 0 | -3.877408 | -5.154102 | -4.151222 |
| 120 | 1  | 0 | 0.760273  | -5.335315 | -4.031239 |
| 121 | 1  | 0 | 3.993191  | -4.587496 | -5.078733 |
| 122 | 1  | 0 | 6.517987  | -1.070523 | -4.608699 |
| 123 | 1  | 0 | -1.541684 | -2.726380 | -5.462843 |
| 124 | 14 | 0 | -1.780366 | 2.837758  | -2.074387 |
| 125 | 79 | 0 | 0.181000  | -0.089655 | -1.606354 |
| 126 | 79 | 0 | 2.242873  | -1.480214 | -0.700066 |
| 127 | 79 | 0 | 1.545526  | 0.862249  | 0.569035  |
| 128 | 6  | 0 | 2.760605  | 1.570195  | 2.194353  |
| 129 | 1  | 0 | 3.742015  | 1.173208  | 1.941176  |
| 130 | 1  | 0 | 5.339025  | -2.154355 | -0.772921 |
| 131 | 1  | 0 | 2.635853  | 2.631793  | 1.963278  |
| 132 | 6  | 0 | 2.265428  | 1.173082  | 3.550122  |
| 133 | 1  | 0 | 2.286781  | 0.084984  | 3.689351  |
| 134 | 1  | 0 | 2.983603  | 1.587418  | 4.280583  |
| 135 | 8  | 0 | 0.999764  | 1.717931  | 3.868265  |
| 136 | 8  | 0 | 5.121714  | -2.888349 | -0.128564 |
| 137 | 8  | 0 | 3.804918  | -2.977337 | 0.013394  |
| 138 | 1  | 0 | 0.317174  | 1.133971  | 3.505272  |

-----

Zero-point correction= 0.395270 (Hartree/Particle)  
 Thermal correction to Energy= 0.481764  
 Thermal correction to Enthalpy= 0.482708  
 Thermal correction to Gibbs Free Energy= 0.282185  
 Sum of electronic and zero-point Energies= -14045.127671  
 Sum of electronic and thermal Energies= -14045.041177  
 Sum of electronic and thermal Enthalpies= -14045.040233  
 Sum of electronic and thermal Free Energies= -14045.240757

M06-L/def2-TZVP//b3lyp/6-31G(d,p)-LANL2DZ Single point energy: -14048.4979998

## TS4

**Charge: 1 multiplicity: 1**

-----

| Center<br>Number | Atomic<br>Number | Atomic<br>Type | Coordinates (Angstroms) |          |           |
|------------------|------------------|----------------|-------------------------|----------|-----------|
|                  |                  |                | X                       | Y        | Z         |
| 1                | 14               | 0              | 4.157209                | 5.178496 | 0.687655  |
| 2                | 14               | 0              | 6.440932                | 3.319026 | 1.700663  |
| 3                | 14               | 0              | 4.077965                | 4.671247 | -2.399195 |
| 4                | 14               | 0              | 6.202204                | 2.570374 | -3.026392 |
| 5                | 8                | 0              | 5.019126                | 3.917104 | 1.213021  |
| 6                | 8                | 0              | 6.607011                | 1.940513 | 0.834115  |
| 7                | 8                | 0              | 4.192731                | 5.377423 | -0.931417 |

|    |    |   |           |           |           |
|----|----|---|-----------|-----------|-----------|
| 8  | 8  | 0 | 4.834771  | 3.243288  | -2.448921 |
| 9  | 8  | 0 | 6.096628  | 1.013126  | -2.542546 |
| 10 | 14 | 0 | -1.755942 | 2.135895  | 3.549010  |
| 11 | 14 | 0 | -4.830942 | 2.020015  | 3.699790  |
| 12 | 14 | 0 | -6.060119 | 3.171955  | -1.768886 |
| 13 | 14 | 0 | -3.824142 | 4.955704  | -2.998350 |
| 14 | 14 | 0 | 1.043602  | 4.781738  | -3.141196 |
| 15 | 14 | 0 | -2.164264 | 0.677389  | -3.922264 |
| 16 | 14 | 0 | -5.280619 | 0.889156  | -3.684014 |
| 17 | 14 | 0 | -5.868951 | 3.714626  | 1.334135  |
| 18 | 14 | 0 | -3.622619 | 5.693861  | 1.744255  |
| 19 | 14 | 0 | 1.202466  | 5.388928  | 1.580818  |
| 20 | 14 | 0 | -1.409916 | 3.719186  | 0.861653  |
| 21 | 8  | 0 | -3.260410 | 2.002265  | 4.175871  |
| 22 | 8  | 0 | -5.233269 | 4.446879  | -2.354185 |
| 23 | 8  | 0 | -0.000775 | 3.664931  | -2.550440 |
| 24 | 8  | 0 | -2.636024 | 3.848332  | -2.745070 |
| 25 | 8  | 0 | -5.447664 | 1.757739  | -2.320176 |
| 26 | 8  | 0 | -1.501625 | 1.461391  | -2.627181 |
| 27 | 8  | 0 | 2.540273  | 4.297152  | -2.760996 |
| 28 | 8  | 0 | -5.922763 | 3.090494  | -0.157668 |
| 29 | 8  | 0 | -1.512144 | 2.862771  | -0.506719 |
| 30 | 8  | 0 | -3.738717 | 0.317902  | -3.744688 |
| 31 | 8  | 0 | -5.142759 | 5.177519  | 1.395941  |
| 32 | 8  | 0 | 0.061929  | 4.353552  | 1.023913  |
| 33 | 8  | 0 | -2.513916 | 4.908793  | 0.816906  |
| 34 | 8  | 0 | -4.970277 | 2.665033  | 2.216965  |
| 35 | 8  | 0 | -1.797605 | 2.679454  | 2.038098  |
| 36 | 8  | 0 | 2.665350  | 4.799448  | 1.201991  |
| 37 | 14 | 0 | 7.151325  | 0.425688  | 1.011159  |
| 38 | 14 | 0 | 6.988979  | -0.219602 | -1.977109 |
| 39 | 8  | 0 | 6.933225  | -0.404109 | -0.359168 |
| 40 | 14 | 0 | 1.100958  | -2.893922 | 4.216215  |
| 41 | 14 | 0 | -0.994828 | -0.654614 | 4.472340  |
| 42 | 14 | 0 | -5.776821 | -0.664862 | 4.760220  |
| 43 | 14 | 0 | 3.897025  | -4.329992 | -4.145957 |
| 44 | 14 | 0 | -3.383921 | -2.746620 | 4.280481  |
| 45 | 14 | 0 | 6.302163  | -2.308654 | -4.022921 |
| 46 | 14 | 0 | -3.075919 | -5.503358 | -0.754353 |
| 47 | 14 | 0 | 0.012616  | -5.507084 | -0.870472 |
| 48 | 14 | 0 | 0.931714  | -4.156582 | -3.477561 |
| 49 | 14 | 0 | -1.428379 | -2.297189 | -4.193716 |
| 50 | 14 | 0 | -6.372433 | -1.973951 | -3.990646 |
| 51 | 14 | 0 | 4.195658  | -2.949906 | 4.619409  |
| 52 | 14 | 0 | -3.989963 | -3.798922 | -3.137066 |
| 53 | 14 | 0 | 6.448289  | -1.174970 | 3.555064  |
| 54 | 14 | 0 | -2.951143 | -4.922670 | 2.352223  |
| 55 | 14 | 0 | 0.141123  | -4.995920 | 2.218939  |
| 56 | 8  | 0 | 0.543443  | -1.287775 | 4.113302  |
| 57 | 8  | 0 | -1.140093 | 0.611569  | 3.507095  |
| 58 | 8  | 0 | -5.432962 | 0.505473  | 3.664312  |
| 59 | 8  | 0 | -4.644158 | -1.830863 | 4.630131  |
| 60 | 8  | 0 | 4.863272  | -3.032693 | -4.180814 |
| 61 | 8  | 0 | -1.989622 | -1.877543 | 4.171453  |
| 62 | 8  | 0 | -1.543732 | -5.601624 | -1.339639 |
| 63 | 8  | 0 | 0.868662  | -3.644907 | 2.802319  |
| 64 | 8  | 0 | -3.586939 | -3.504025 | 2.852980  |
| 65 | 8  | 0 | 6.367922  | -1.599875 | -2.550860 |
| 66 | 8  | 0 | 2.461595  | -3.720155 | -3.663173 |
| 67 | 8  | 0 | -3.037607 | -4.871829 | 0.741457  |

|     |    |   |           |           |           |
|-----|----|---|-----------|-----------|-----------|
| 68  | 8  | 0 | 0.151863  | -4.745763 | 0.596519  |
| 69  | 8  | 0 | 0.032519  | -2.851601 | -3.793672 |
| 70  | 8  | 0 | -1.309496 | -0.697968 | -3.902429 |
| 71  | 8  | 0 | -6.319128 | -0.361850 | -3.677775 |
| 72  | 8  | 0 | -5.220501 | -2.745762 | -3.112843 |
| 73  | 8  | 0 | 5.105435  | -2.108882 | 3.585542  |
| 74  | 8  | 0 | -2.565542 | -3.004476 | -3.267320 |
| 75  | 8  | 0 | -1.371130 | -5.074428 | 2.816718  |
| 76  | 8  | 0 | 0.825083  | -4.562313 | -1.891250 |
| 77  | 8  | 0 | -4.008991 | -4.579832 | -1.700798 |
| 78  | 8  | 0 | 6.306803  | -0.318440 | 2.185876  |
| 79  | 8  | 0 | 2.633901  | -2.515843 | 4.423938  |
| 80  | 1  | 0 | 7.534078  | 4.197377  | 1.341025  |
| 81  | 1  | 0 | 7.325840  | 3.302417  | -2.440751 |
| 82  | 1  | 0 | 8.537880  | 0.504159  | 1.396509  |
| 83  | 1  | 0 | 8.355506  | 0.033534  | -2.406417 |
| 84  | 1  | 0 | 7.649548  | -1.978019 | 3.701192  |
| 85  | 1  | 0 | 7.291316  | -3.345938 | -3.976076 |
| 86  | 1  | 0 | 4.307881  | -5.425251 | -3.195311 |
| 87  | 1  | 0 | 4.350368  | -4.325669 | 4.318438  |
| 88  | 1  | 0 | 0.895544  | -6.182808 | 2.612796  |
| 89  | 1  | 0 | 0.631907  | -6.813965 | -0.792484 |
| 90  | 1  | 0 | 4.715677  | 6.396538  | 1.248573  |
| 91  | 1  | 0 | 4.666477  | 5.600800  | -3.347654 |
| 92  | 1  | 0 | 1.101129  | 6.681763  | 0.902613  |
| 93  | 1  | 0 | 0.815500  | 6.097958  | -2.569829 |
| 94  | 1  | 0 | -3.561278 | 7.040236  | 1.263700  |
| 95  | 1  | 0 | -3.536989 | 6.240101  | -2.390949 |
| 96  | 1  | 0 | -7.213633 | 3.917099  | 1.817483  |
| 97  | 1  | 0 | -7.421995 | 3.386842  | -2.190476 |
| 98  | 1  | 0 | -7.065901 | -1.205171 | 4.425145  |
| 99  | 1  | 0 | -7.662364 | -2.458005 | -3.573000 |
| 100 | 1  | 0 | -3.608692 | -6.047054 | 2.989061  |
| 101 | 1  | 0 | -3.579805 | -6.837903 | -0.661718 |
| 102 | 1  | 0 | 6.453366  | -0.307294 | 4.696089  |
| 103 | 1  | 0 | 6.402669  | 3.145919  | 3.166067  |
| 104 | 1  | 0 | 4.388300  | -2.714872 | 6.016869  |
| 105 | 1  | 0 | 0.489748  | -3.649666 | 5.323393  |
| 106 | 1  | 0 | -3.215853 | -3.695980 | 5.340371  |
| 107 | 1  | 0 | -0.880529 | -0.319775 | 5.874325  |
| 108 | 1  | 0 | -5.722160 | -0.226596 | 6.153854  |
| 109 | 1  | 0 | -5.553793 | 2.785942  | 4.677179  |
| 110 | 1  | 0 | 1.098820  | 5.498608  | 3.036733  |
| 111 | 1  | 0 | -3.323484 | 5.529488  | 3.196369  |
| 112 | 1  | 0 | -0.964319 | 2.999631  | 4.389562  |
| 113 | 1  | 0 | -3.937215 | 5.038311  | -4.437705 |
| 114 | 1  | 0 | 0.899352  | 4.852575  | -4.578979 |
| 115 | 1  | 0 | -5.518066 | 1.712568  | -4.856799 |
| 116 | 1  | 0 | -1.908895 | 1.445686  | -5.118691 |
| 117 | 1  | 0 | 6.303994  | 2.630631  | -4.494737 |
| 118 | 1  | 0 | -6.160238 | -2.230309 | -5.417532 |
| 119 | 1  | 0 | -4.125479 | -4.773513 | -4.221738 |
| 120 | 1  | 0 | 0.490445  | -5.256902 | -4.344783 |
| 121 | 1  | 0 | 3.708919  | -4.695087 | -5.542206 |
| 122 | 1  | 0 | 6.479919  | -1.360766 | -5.131569 |
| 123 | 1  | 0 | -1.703877 | -2.471504 | -5.602440 |
| 124 | 14 | 0 | -1.405924 | 3.024453  | -2.106719 |
| 125 | 79 | 0 | -0.265812 | -0.124719 | -1.297589 |
| 126 | 79 | 0 | 0.547090  | -2.198853 | 0.085003  |
| 127 | 79 | 0 | 1.067622  | 0.312634  | 1.019950  |

|     |   |   |          |           |          |
|-----|---|---|----------|-----------|----------|
| 128 | 8 | 0 | 1.676453 | 1.607555  | 2.577571 |
| 129 | 6 | 0 | 2.585205 | 1.168049  | 3.424382 |
| 130 | 6 | 0 | 3.054895 | 2.198414  | 4.441561 |
| 131 | 1 | 0 | 3.412128 | 0.573345  | 3.006625 |
| 132 | 1 | 0 | 2.200952 | 2.676149  | 4.928690 |
| 133 | 1 | 0 | 3.706144 | 1.750843  | 5.198927 |
| 134 | 1 | 0 | 3.615929 | 2.967679  | 3.901465 |
| 135 | 1 | 0 | 1.427007 | -0.480786 | 4.152106 |
| 136 | 1 | 0 | 2.119974 | 0.259996  | 4.207989 |

-----

Zero-point correction= 0.382929 (Hartree/Particle)  
 Thermal correction to Energy= 0.466140  
 Thermal correction to Enthalpy= 0.467084  
 Thermal correction to Gibbs Free Energy= 0.275303  
 Sum of electronic and zero-point Energies= -13894.769590  
 Sum of electronic and thermal Energies= -13894.686379  
 Sum of electronic and thermal Enthalpies= -13894.685435  
 Sum of electronic and thermal Free Energies= -13894.877216

M06-L/def2-TZVP//b3lyp/6-31G(d,p)-LANL2DZ Single point energy: -13898.0877956

## TS1

**Charge: 1 multiplicity: 3**

-----

| Center<br>Number | Atomic<br>Number | Atomic<br>Type | Coordinates (Angstroms) |          |           |
|------------------|------------------|----------------|-------------------------|----------|-----------|
|                  |                  |                | X                       | Y        | Z         |
| 1                | 14               | 0              | -4.192967               | 5.040150 | 1.442341  |
| 2                | 14               | 0              | -6.374709               | 3.051356 | 2.434545  |
| 3                | 14               | 0              | -4.283969               | 4.786446 | -1.674102 |
| 4                | 14               | 0              | -6.410635               | 2.688255 | -2.345011 |
| 5                | 8                | 0              | -5.018362               | 3.733467 | 1.880435  |
| 6                | 8                | 0              | -6.568455               | 1.741079 | 1.472670  |
| 7                | 8                | 0              | -4.301005               | 5.372598 | -0.157433 |
| 8                | 8                | 0              | -5.011279               | 3.343277 | -1.813480 |
| 9                | 8                | 0              | -6.232852               | 1.100340 | -1.999641 |
| 10               | 14               | 0              | 1.936353                | 1.915972 | 3.702190  |
| 11               | 14               | 0              | 5.017285                | 1.819681 | 3.675378  |
| 12               | 14               | 0              | 5.903098                | 3.460788 | -1.759442 |
| 13               | 14               | 0              | 3.563239                | 5.289777 | -2.715520 |
| 14               | 14               | 0              | -1.305535               | 5.024109 | -2.587575 |
| 15               | 14               | 0              | 1.913791                | 1.064127 | -3.868014 |
| 16               | 14               | 0              | 5.041937                | 1.325963 | -3.807576 |
| 17               | 14               | 0              | 5.887238                | 3.722113 | 1.385652  |
| 18               | 14               | 0              | 3.619896                | 5.644897 | 2.072630  |
| 19               | 14               | 0              | -1.195835               | 5.253409 | 2.175239  |
| 20               | 14               | 0              | 1.389926                | 3.703960 | 1.177843  |
| 21               | 8                | 0              | 3.473759                | 1.800334 | 4.227113  |
| 22               | 8                | 0              | 5.008022                | 4.754952 | -2.185978 |
| 23               | 8                | 0              | -0.217032               | 3.876076 | -2.147711 |
| 24               | 8                | 0              | 2.401706                | 4.142873 | -2.485237 |
| 25               | 8                | 0              | 5.281106                | 2.085258 | -2.392685 |
| 26               | 8                | 0              | 1.294343                | 1.726623 | -2.482685 |
| 27               | 8                | 0              | -2.768761               | 4.465396 | -2.176748 |
| 28               | 8                | 0              | 5.869635                | 3.233256 | -0.159090 |
| 29               | 8                | 0              | 1.425798                | 2.955411 | -0.263259 |
| 30               | 8                | 0              | 3.502116                | 0.737459 | -3.805218 |
| 31               | 8                | 0              | 5.106028                | 5.143680 | 1.592007  |
| 32               | 8                | 0              | -0.097599               | 4.254664 | 1.470327  |

|    |    |   |           |           |           |
|----|----|---|-----------|-----------|-----------|
| 33 | 8  | 0 | 2.441712  | 4.938874  | 1.159982  |
| 34 | 8  | 0 | 5.103342  | 2.554925  | 2.224843  |
| 35 | 8  | 0 | 1.874307  | 2.581790  | 2.231379  |
| 36 | 8  | 0 | -2.670249 | 4.671243  | 1.856608  |
| 37 | 14 | 0 | -7.064041 | 0.202373  | 1.571534  |
| 38 | 14 | 0 | -7.075779 | -0.190933 | -1.469463 |
| 39 | 8  | 0 | -6.914731 | -0.498222 | 0.115700  |
| 40 | 14 | 0 | -0.746936 | -3.181134 | 4.119995  |
| 41 | 14 | 0 | 1.321556  | -0.952413 | 4.429319  |
| 42 | 14 | 0 | 6.093180  | -0.934221 | 4.459787  |
| 43 | 14 | 0 | -4.046821 | -4.051489 | -4.142864 |
| 44 | 14 | 0 | 3.796387  | -2.947873 | 3.966649  |
| 45 | 14 | 0 | -6.476811 | -2.098720 | -3.717834 |
| 46 | 14 | 0 | 3.139777  | -5.327825 | -1.254690 |
| 47 | 14 | 0 | 0.064578  | -5.400113 | -1.202656 |
| 48 | 14 | 0 | -1.043956 | -3.868929 | -3.630736 |
| 49 | 14 | 0 | 1.234107  | -1.901665 | -4.341563 |
| 50 | 14 | 0 | 6.168180  | -1.483730 | -4.407431 |
| 51 | 14 | 0 | -3.791305 | -3.357286 | 4.706104  |
| 52 | 14 | 0 | 3.879837  | -3.427676 | -3.554026 |
| 53 | 14 | 0 | -6.166796 | -1.583099 | 3.928863  |
| 54 | 14 | 0 | 3.173161  | -4.981915 | 1.901818  |
| 55 | 14 | 0 | 0.079012  | -5.130090 | 1.947820  |
| 56 | 8  | 0 | -0.001714 | -1.749853 | 3.914863  |
| 57 | 8  | 0 | 1.272185  | 0.427523  | 3.564197  |
| 58 | 8  | 0 | 5.536186  | 0.283747  | 3.506732  |
| 59 | 8  | 0 | 5.230222  | -2.305183 | 4.287402  |
| 60 | 8  | 0 | -5.029093 | -2.768522 | -4.014152 |
| 61 | 8  | 0 | 2.650360  | -1.801946 | 4.075181  |
| 62 | 8  | 0 | 1.583250  | -5.418652 | -1.784959 |
| 63 | 8  | 0 | -0.741498 | -3.919870 | 2.651448  |
| 64 | 8  | 0 | 3.783445  | -3.577320 | 2.454517  |
| 65 | 8  | 0 | -6.456829 | -1.499340 | -2.198759 |
| 66 | 8  | 0 | -2.591335 | -3.456901 | -3.693867 |
| 67 | 8  | 0 | 3.148894  | -4.824776 | 0.287041  |
| 68 | 8  | 0 | 0.032291  | -4.752379 | 0.329154  |
| 69 | 8  | 0 | -0.191831 | -2.516375 | -3.893958 |
| 70 | 8  | 0 | 1.091764  | -0.333672 | -3.909666 |
| 71 | 8  | 0 | 6.091770  | 0.096689  | -3.966296 |
| 72 | 8  | 0 | 5.088065  | -2.350327 | -3.526476 |
| 73 | 8  | 0 | -4.814842 | -2.487383 | 3.798810  |
| 74 | 8  | 0 | 2.436039  | -2.648773 | -3.540642 |
| 75 | 8  | 0 | 1.626410  | -5.187771 | 2.451847  |
| 76 | 8  | 0 | -0.820556 | -4.379276 | -2.087213 |
| 77 | 8  | 0 | 3.991475  | -4.303080 | -2.178892 |
| 78 | 8  | 0 | -6.142812 | -0.627280 | 2.613585  |
| 79 | 8  | 0 | -2.265866 | -2.814637 | 4.482750  |
| 80 | 1  | 0 | -7.497952 | 3.936517  | 2.209481  |
| 81 | 1  | 0 | -7.503063 | 3.345918  | -1.637187 |
| 82 | 1  | 0 | -8.430045 | 0.228497  | 2.029572  |
| 83 | 1  | 0 | -8.469861 | 0.061999  | -1.802843 |
| 84 | 1  | 0 | -7.359366 | -2.406060 | 4.072782  |
| 85 | 1  | 0 | -7.442147 | -3.158904 | -3.696796 |
| 86 | 1  | 0 | -4.380047 | -5.224820 | -3.261387 |
| 87 | 1  | 0 | -3.987241 | -4.719418 | 4.305479  |
| 88 | 1  | 0 | -0.609207 | -6.358080 | 2.256695  |
| 89 | 1  | 0 | -0.540974 | -6.713996 | -1.197608 |
| 90 | 1  | 0 | -4.730225 | 6.199554  | 2.126555  |
| 91 | 1  | 0 | -4.945277 | 5.768147  | -2.513410 |
| 92 | 1  | 0 | -1.149018 | 6.593056  | 1.592067  |

|     |    |   |           |           |           |
|-----|----|---|-----------|-----------|-----------|
| 93  | 1  | 0 | -1.063638 | 6.290112  | -1.926550 |
| 94  | 1  | 0 | 3.519511  | 7.027801  | 1.705178  |
| 95  | 1  | 0 | 3.288218  | 6.516556  | -1.994000 |
| 96  | 1  | 0 | 7.254173  | 3.954513  | 1.792077  |
| 97  | 1  | 0 | 7.228948  | 3.745230  | -2.250671 |
| 98  | 1  | 0 | 7.356645  | -1.358597 | 3.987454  |
| 99  | 1  | 0 | 7.490136  | -1.966173 | -4.106289 |
| 100 | 1  | 0 | 3.906009  | -6.150103 | 2.376219  |
| 101 | 1  | 0 | 3.671020  | -6.652560 | -1.317850 |
| 102 | 1  | 0 | -6.135338 | -0.791835 | 5.125399  |
| 103 | 1  | 0 | -6.239401 | 2.771050  | 3.875055  |
| 104 | 1  | 0 | -3.951175 | -3.248123 | 6.126111  |
| 105 | 1  | 0 | -0.085585 | -4.036924 | 5.131801  |
| 106 | 1  | 0 | 3.614463  | -4.000201 | 4.926568  |
| 107 | 1  | 0 | 1.255445  | -0.730327 | 5.864437  |
| 108 | 1  | 0 | 6.102676  | -0.549433 | 5.864793  |
| 109 | 1  | 0 | 5.791091  | 2.565015  | 4.645410  |
| 110 | 1  | 0 | -0.996239 | 5.246381  | 3.621169  |
| 111 | 1  | 0 | 3.426355  | 5.365036  | 3.521944  |
| 112 | 1  | 0 | 1.189621  | 2.696457  | 4.646368  |
| 113 | 1  | 0 | 3.585546  | 5.488278  | -4.149905 |
| 114 | 1  | 0 | -1.246705 | 5.204575  | -4.020011 |
| 115 | 1  | 0 | 5.197433  | 2.242478  | -4.925142 |
| 116 | 1  | 0 | 1.584478  | 1.915264  | -4.993710 |
| 117 | 1  | 0 | -6.595626 | 2.860866  | -3.794875 |
| 118 | 1  | 0 | 5.875226  | -1.628605 | -5.835074 |
| 119 | 1  | 0 | 3.962557  | -4.303316 | -4.727811 |
| 120 | 1  | 0 | -0.642826 | -4.880170 | -4.616736 |
| 121 | 1  | 0 | -3.937493 | -4.299343 | -5.573839 |
| 122 | 1  | 0 | -6.737990 | -1.071280 | -4.736253 |
| 123 | 1  | 0 | 1.420861  | -1.955576 | -5.775505 |
| 124 | 14 | 0 | 1.232792  | 3.246368  | -1.836667 |
| 125 | 79 | 0 | -0.132249 | -2.326522 | 0.109571  |
| 126 | 79 | 0 | -0.869863 | -0.136976 | 1.516046  |
| 127 | 79 | 0 | 0.029352  | 0.024741  | -1.142855 |
| 128 | 6  | 0 | -2.632509 | 0.133776  | -3.758261 |
| 129 | 1  | 0 | -2.955946 | 0.673328  | -4.655907 |
| 130 | 1  | 0 | -3.370567 | -0.637615 | -3.530184 |
| 131 | 1  | 0 | -1.683605 | -0.360447 | -3.979917 |
| 132 | 6  | 0 | -2.495762 | 1.109424  | -2.607979 |
| 133 | 1  | 0 | -3.442766 | 1.621345  | -2.392881 |
| 134 | 1  | 0 | -1.763269 | 1.897433  | -2.820307 |
| 135 | 8  | 0 | -2.151833 | 0.440846  | -1.381487 |
| 136 | 1  | 0 | -2.446171 | 1.136577  | -0.440202 |
| 137 | 8  | 0 | -2.838091 | 1.868931  | 0.462786  |
| 138 | 8  | 0 | -2.331762 | 1.535688  | 1.630900  |

-----

|                                              |                             |
|----------------------------------------------|-----------------------------|
| Zero-point correction=                       | 0.390407 (Hartree/Particle) |
| Thermal correction to Energy=                | 0.476797                    |
| Thermal correction to Enthalpy=              | 0.477741                    |
| Thermal correction to Gibbs Free Energy=     | 0.276760                    |
| Sum of electronic and zero-point Energies=   | -14045.106548               |
| Sum of electronic and thermal Energies=      | -14045.020159               |
| Sum of electronic and thermal Enthalpies=    | -14045.019215               |
| Sum of electronic and thermal Free Energies= | -14045.220195               |

M06-L/def2-TZVP//b3lyp/6-31G(d,p)-LANL2DZ Single point energy: -14048.491806

**TS1a**



**Charge: 1 multiplicity: 3**

| Center<br>Number | Atomic<br>Number | Atomic<br>Type | Coordinates (Angstroms) |           |           |
|------------------|------------------|----------------|-------------------------|-----------|-----------|
|                  |                  |                | X                       | Y         | Z         |
| 1                | 14               | 0              | 4.333521                | 5.054345  | 0.748815  |
| 2                | 14               | 0              | 6.572015                | 3.109474  | 1.701847  |
| 3                | 14               | 0              | 4.211291                | 4.613085  | -2.354434 |
| 4                | 14               | 0              | 6.272244                | 2.462105  | -3.034083 |
| 5                | 8                | 0              | 5.154203                | 3.751381  | 1.244346  |
| 6                | 8                | 0              | 6.711274                | 1.751254  | 0.811616  |
| 7                | 8                | 0              | 4.333277                | 5.279230  | -0.863926 |
| 8                | 8                | 0              | 4.933795                | 3.172012  | -2.430945 |
| 9                | 8                | 0              | 6.124315                | 0.902477  | -2.576273 |
| 10               | 14               | 0              | -1.660009               | 2.139263  | 3.595450  |
| 11               | 14               | 0              | -4.730440               | 2.088997  | 3.769547  |
| 12               | 14               | 0              | -5.962390               | 3.400428  | -1.681000 |
| 13               | 14               | 0              | -3.684077               | 5.152143  | -2.891942 |
| 14               | 14               | 0              | 1.176716                | 4.828410  | -3.073597 |
| 15               | 14               | 0              | -2.171607               | 0.838664  | -3.917921 |
| 16               | 14               | 0              | -5.271118               | 1.136354  | -3.652085 |
| 17               | 14               | 0              | -5.735469               | 3.853402  | 1.432098  |
| 18               | 14               | 0              | -3.410740               | 5.784746  | 1.861396  |
| 19               | 14               | 0              | 1.390094                | 5.343092  | 1.662186  |
| 20               | 14               | 0              | -1.261588               | 3.765153  | 0.933351  |
| 21               | 8                | 0              | -3.158349               | 2.093168  | 4.231674  |
| 22               | 8                | 0              | -5.094016               | 4.662637  | -2.236222 |
| 23               | 8                | 0              | 0.109866                | 3.719024  | -2.504243 |
| 24               | 8                | 0              | -2.512866               | 4.022465  | -2.670034 |
| 25               | 8                | 0              | -5.388782               | 1.984652  | -2.270983 |
| 26               | 8                | 0              | -1.510737               | 1.586131  | -2.600078 |
| 27               | 8                | 0              | 2.662174                | 4.295678  | -2.716095 |
| 28               | 8                | 0              | -5.828649               | 3.267033  | -0.073922 |
| 29               | 8                | 0              | -1.412068               | 2.953331  | -0.457659 |
| 30               | 8                | 0              | -3.752262               | 0.509272  | -3.751844 |
| 31               | 8                | 0              | -4.926010               | 5.273287  | 1.496524  |
| 32               | 8                | 0              | 0.258070                | 4.298537  | 1.100818  |
| 33               | 8                | 0              | -2.280730               | 5.026152  | 0.932131  |
| 34               | 8                | 0              | -4.896686               | 2.737505  | 2.287706  |
| 35               | 8                | 0              | -1.677143               | 2.716347  | 2.087377  |
| 36               | 8                | 0              | 2.843568                | 4.703905  | 1.310079  |
| 37               | 14               | 0              | 7.182342                | 0.205685  | 0.955005  |
| 38               | 14               | 0              | 6.979781                | -0.370370 | -2.042346 |
| 39               | 8                | 0              | 6.938618                | -0.590728 | -0.428440 |
| 40               | 14               | 0              | 1.026946                | -2.940133 | 4.139301  |
| 41               | 14               | 0              | -0.985297               | -0.697924 | 4.447220  |
| 42               | 14               | 0              | -5.760829               | -0.600376 | 4.786900  |
| 43               | 14               | 0              | 3.750520                | -4.339754 | -4.270889 |
| 44               | 14               | 0              | -3.494007               | -2.700792 | 4.249769  |
| 45               | 14               | 0              | 6.216002                | -2.394526 | -4.126175 |
| 46               | 14               | 0              | -3.230356               | -5.370173 | -0.846111 |
| 47               | 14               | 0              | -0.152848               | -5.468435 | -0.990001 |
| 48               | 14               | 0              | 0.795819                | -4.093504 | -3.574954 |
| 49               | 14               | 0              | -1.511964               | -2.151468 | -4.241562 |
| 50               | 14               | 0              | -6.442449               | -1.683832 | -4.001083 |
| 51               | 14               | 0              | 4.111163                | -3.134347 | 4.518272  |
| 52               | 14               | 0              | -4.111424               | -3.596565 | -3.193420 |
| 53               | 14               | 0              | 6.438229                | -1.422494 | 3.478988  |
| 54               | 14               | 0              | -3.059334               | -4.846900 | 2.276478  |
| 55               | 14               | 0              | 0.032710                | -5.010943 | 2.131548  |

|     |   |   |           |           |           |
|-----|---|---|-----------|-----------|-----------|
| 56  | 8 | 0 | 0.404667  | -1.433813 | 3.986255  |
| 57  | 8 | 0 | -1.063726 | 0.622951  | 3.513125  |
| 58  | 8 | 0 | -5.286815 | 0.558859  | 3.724442  |
| 59  | 8 | 0 | -4.842821 | -1.934001 | 4.642616  |
| 60  | 8 | 0 | 4.754588  | -3.070997 | -4.289513 |
| 61  | 8 | 0 | -2.230600 | -1.681100 | 4.178646  |
| 62  | 8 | 0 | -1.710452 | -5.505181 | -1.460852 |
| 63  | 8 | 0 | 0.867970  | -3.744030 | 2.722530  |
| 64  | 8 | 0 | -3.653612 | -3.420337 | 2.791712  |
| 65  | 8 | 0 | 6.312769  | -1.717442 | -2.641272 |
| 66  | 8 | 0 | 2.336217  | -3.698510 | -3.764704 |
| 67  | 8 | 0 | -3.140579 | -4.777844 | 0.661366  |
| 68  | 8 | 0 | -0.005062 | -4.732271 | 0.496904  |
| 69  | 8 | 0 | -0.065799 | -2.752860 | -3.857190 |
| 70  | 8 | 0 | -1.350567 | -0.560192 | -3.904130 |
| 71  | 8 | 0 | -6.349474 | -0.078540 | -3.658548 |
| 72  | 8 | 0 | -5.306590 | -2.503064 | -3.145734 |
| 73  | 8 | 0 | 5.063442  | -2.302871 | 3.502158  |
| 74  | 8 | 0 | -2.664471 | -2.841532 | -3.323694 |
| 75  | 8 | 0 | -1.480323 | -5.032471 | 2.735362  |
| 76  | 8 | 0 | 0.683598  | -4.529924 | -1.997608 |
| 77  | 8 | 0 | -4.140583 | -4.396026 | -1.767925 |
| 78  | 8 | 0 | 6.327871  | -0.512091 | 2.138462  |
| 79  | 8 | 0 | 2.583045  | -2.589464 | 4.353788  |
| 80  | 1 | 0 | 7.676837  | 3.966561  | 1.354078  |
| 81  | 1 | 0 | 7.418377  | 3.152068  | -2.442755 |
| 82  | 1 | 0 | 8.569578  | 0.244592  | 1.331520  |
| 83  | 1 | 0 | 8.349583  | -0.146197 | -2.478452 |
| 84  | 1 | 0 | 7.621394  | -2.254330 | 3.593874  |
| 85  | 1 | 0 | 7.174654  | -3.461109 | -4.105745 |
| 86  | 1 | 0 | 4.135007  | -5.465072 | -3.345018 |
| 87  | 1 | 0 | 4.257078  | -4.513828 | 4.188082  |
| 88  | 1 | 0 | 0.737409  | -6.233097 | 2.470378  |
| 89  | 1 | 0 | 0.434013  | -6.789823 | -0.944543 |
| 90  | 1 | 0 | 4.925251  | 6.250428  | 1.323168  |
| 91  | 1 | 0 | 4.823684  | 5.546202  | -3.287116 |
| 92  | 1 | 0 | 1.318821  | 6.650314  | 1.007282  |
| 93  | 1 | 0 | 0.994273  | 6.143055  | -2.473763 |
| 94  | 1 | 0 | -3.328383 | 7.140961  | 1.406812  |
| 95  | 1 | 0 | -3.350799 | 6.411808  | -2.262687 |
| 96  | 1 | 0 | -7.069392 | 4.118311  | 1.925000  |
| 97  | 1 | 0 | -7.318414 | 3.672698  | -2.090938 |
| 98  | 1 | 0 | -7.059433 | -1.055925 | 4.432334  |
| 99  | 1 | 0 | -7.742816 | -2.134302 | -3.584255 |
| 100 | 1 | 0 | -3.758201 | -5.970181 | 2.879750  |
| 101 | 1 | 0 | -3.775697 | -6.690249 | -0.785720 |
| 102 | 1 | 0 | 6.482123  | -0.568271 | 4.628891  |
| 103 | 1 | 0 | 6.525688  | 2.914062  | 3.166129  |
| 104 | 1 | 0 | 4.353898  | -2.938275 | 5.916958  |
| 105 | 1 | 0 | 0.424806  | -3.742364 | 5.232046  |
| 106 | 1 | 0 | -3.280337 | -3.678133 | 5.273239  |
| 107 | 1 | 0 | -0.841391 | -0.384330 | 5.856357  |
| 108 | 1 | 0 | -5.676211 | -0.151834 | 6.170443  |
| 109 | 1 | 0 | -5.426592 | 2.882506  | 4.751029  |
| 110 | 1 | 0 | 1.294209  | 5.426431  | 3.118164  |
| 111 | 1 | 0 | -3.124104 | 5.586450  | 3.308335  |
| 112 | 1 | 0 | -0.834633 | 2.964389  | 4.436502  |
| 113 | 1 | 0 | -3.799597 | 5.262610  | -4.329386 |
| 114 | 1 | 0 | 1.028216  | 4.935126  | -4.507097 |
| 115 | 1 | 0 | -5.482178 | 1.994442  | -4.801868 |

|     |    |   |           |           |           |
|-----|----|---|-----------|-----------|-----------|
| 116 | 1  | 0 | -1.884455 | 1.625040  | -5.093431 |
| 117 | 1  | 0 | 6.364100  | 2.551288  | -4.502339 |
| 118 | 1  | 0 | -6.245991 | -1.915758 | -5.434191 |
| 119 | 1  | 0 | -4.281171 | -4.541489 | -4.301475 |
| 120 | 1  | 0 | 0.317297  | -5.160255 | -4.465116 |
| 121 | 1  | 0 | 3.543710  | -4.671732 | -5.673279 |
| 122 | 1  | 0 | 6.416105  | -1.430422 | -5.217207 |
| 123 | 1  | 0 | -1.800114 | -2.286497 | -5.653940 |
| 124 | 14 | 0 | -1.319120 | 3.133287  | -2.057653 |
| 125 | 79 | 0 | -0.568963 | -0.147985 | -1.249744 |
| 126 | 79 | 0 | 0.072044  | -2.320646 | 0.099741  |
| 127 | 79 | 0 | 0.836338  | 0.123665  | 0.988161  |
| 128 | 6  | 0 | 3.811183  | 1.263499  | 4.389713  |
| 129 | 1  | 0 | 4.820295  | 1.676063  | 4.327842  |
| 130 | 1  | 0 | 3.286789  | 1.778920  | 5.208601  |
| 131 | 1  | 0 | 3.889425  | 0.204795  | 4.656908  |
| 132 | 6  | 0 | 3.087959  | 1.451180  | 3.093900  |
| 133 | 1  | 0 | 3.069658  | 2.439012  | 2.631475  |
| 134 | 1  | 0 | 3.816478  | 0.832382  | 1.805748  |
| 135 | 8  | 0 | 1.822545  | 0.879407  | 3.015962  |
| 136 | 8  | 0 | 3.048282  | 1.027619  | 0.059072  |
| 137 | 8  | 0 | 4.028308  | 0.548689  | 0.787200  |
| 138 | 1  | 0 | 1.740144  | 0.070246  | 3.558089  |

-----

Zero-point correction= 0.390750 (Hartree/Particle)  
Thermal correction to Energy= 0.477657  
Thermal correction to Enthalpy= 0.478202  
Thermal correction to Gibbs Free Energy= 0.277916  
Sum of electronic and zero-point Energies= -14045.112770  
Sum of electronic and thermal Energies= -14045.016863  
Sum of electronic and thermal Enthalpies= -14045.015918  
Sum of electronic and thermal Free Energies= -14045.225604

M06-L/def2-TZVP//b3lyp/6-31G(d,p)-LANL2DZ Single point energy: -14048.490316

## TS1b

**Charge: 1 multiplicity: 3**

-----

| Center<br>Number | Atomic<br>Number | Atomic<br>Type | Coordinates (Angstroms) |          |           |
|------------------|------------------|----------------|-------------------------|----------|-----------|
|                  |                  |                | X                       | Y        | Z         |
| 1                | 14               | 0              | 4.318908                | 5.165968 | 1.050690  |
| 2                | 14               | 0              | 6.563373                | 3.215441 | 2.002980  |
| 3                | 14               | 0              | 4.277347                | 4.824971 | -2.062157 |
| 4                | 14               | 0              | 6.389583                | 2.728171 | -2.761271 |
| 5                | 8                | 0              | 5.165254                | 3.861735 | 1.496508  |
| 6                | 8                | 0              | 6.694953                | 1.865700 | 1.083954  |
| 7                | 8                | 0              | 4.357755                | 5.450009 | -0.553906 |
| 8                | 8                | 0              | 5.023045                | 3.390810 | -2.157212 |
| 9                | 8                | 0              | 6.246179                | 1.154676 | -2.342438 |
| 10               | 14               | 0              | -1.688929               | 2.056285 | 3.654425  |
| 11               | 14               | 0              | -4.764516               | 1.941359 | 3.753461  |
| 12               | 14               | 0              | -5.885204               | 3.420505 | -1.681888 |
| 13               | 14               | 0              | -3.607197               | 5.259130 | -2.777179 |
| 14               | 14               | 0              | 1.255584                | 5.006080 | -2.848228 |
| 15               | 14               | 0              | -2.010839               | 0.996498 | -3.918341 |
| 16               | 14               | 0              | -5.114713               | 1.238052 | -3.715442 |
| 17               | 14               | 0              | -5.741891               | 3.769051 | 1.449424  |
| 18               | 14               | 0              | -3.456258               | 5.728201 | 2.000333  |

|    |    |   |           |           |           |
|----|----|---|-----------|-----------|-----------|
| 19 | 14 | 0 | 1.354649  | 5.366385  | 1.905937  |
| 20 | 14 | 0 | -1.250691 | 3.777906  | 1.061137  |
| 21 | 8  | 0 | -3.201765 | 1.958344  | 4.246603  |
| 22 | 8  | 0 | -5.014926 | 4.710672  | -2.167403 |
| 23 | 8  | 0 | 0.210828  | 3.837062  | -2.354385 |
| 24 | 8  | 0 | -2.400325 | 4.167227  | -2.567841 |
| 25 | 8  | 0 | -5.271419 | 2.036645  | -2.307520 |
| 26 | 8  | 0 | -1.446719 | 1.714553  | -2.536784 |
| 27 | 8  | 0 | 2.743276  | 4.485220  | -2.466226 |
| 28 | 8  | 0 | -5.793487 | 3.231325  | -0.077446 |
| 29 | 8  | 0 | -1.355252 | 3.017549  | -0.364454 |
| 30 | 8  | 0 | -3.589102 | 0.628277  | -3.813017 |
| 31 | 8  | 0 | -4.947092 | 5.193871  | 1.574260  |
| 32 | 8  | 0 | 0.260956  | 4.319366  | 1.274297  |
| 33 | 8  | 0 | -2.280794 | 5.029144  | 1.079354  |
| 34 | 8  | 0 | -4.913225 | 2.634191  | 2.288801  |
| 35 | 8  | 0 | -1.683689 | 2.682920  | 2.163915  |
| 36 | 8  | 0 | 2.823181  | 4.763447  | 1.546453  |
| 37 | 14 | 0 | 7.241789  | 0.336833  | 1.177331  |
| 38 | 14 | 0 | 7.119686  | -0.129060 | -1.854480 |
| 39 | 8  | 0 | 7.027411  | -0.391199 | -0.248141 |
| 40 | 14 | 0 | 1.057033  | -3.008950 | 4.085044  |
| 41 | 14 | 0 | -1.003465 | -0.798536 | 4.428904  |
| 42 | 14 | 0 | -5.777510 | -0.798692 | 4.654023  |
| 43 | 14 | 0 | 4.006480  | -4.070793 | -4.288910 |
| 44 | 14 | 0 | -3.478034 | -2.827737 | 4.103905  |
| 45 | 14 | 0 | 6.436983  | -2.096634 | -4.023722 |
| 46 | 14 | 0 | -3.033323 | -5.323193 | -1.076460 |
| 47 | 14 | 0 | 0.040644  | -5.377342 | -1.155412 |
| 48 | 14 | 0 | 1.033823  | -3.892408 | -3.658204 |
| 49 | 14 | 0 | -1.283089 | -1.960415 | -4.318545 |
| 50 | 14 | 0 | -6.227899 | -1.581912 | -4.183632 |
| 51 | 14 | 0 | 4.122706  | -3.157636 | 4.543126  |
| 52 | 14 | 0 | -3.883386 | -3.481573 | -3.382517 |
| 53 | 14 | 0 | 6.456346  | -1.389067 | 3.626047  |
| 54 | 14 | 0 | -2.940316 | -4.901975 | 2.071415  |
| 55 | 14 | 0 | 0.151195  | -5.018508 | 1.994326  |
| 56 | 8  | 0 | 0.367585  | -1.537915 | 3.943272  |
| 57 | 8  | 0 | -1.038064 | 0.564173  | 3.544872  |
| 58 | 8  | 0 | -5.281152 | 0.400733  | 3.646525  |
| 59 | 8  | 0 | -4.874826 | -2.140870 | 4.485639  |
| 60 | 8  | 0 | 4.991945  | -2.785367 | -4.245057 |
| 61 | 8  | 0 | -2.282349 | -1.727283 | 4.114345  |
| 62 | 8  | 0 | -1.502748 | -5.418541 | -1.673832 |
| 63 | 8  | 0 | 0.974670  | -3.781288 | 2.647277  |
| 64 | 8  | 0 | -3.564506 | -3.498443 | 2.615401  |
| 65 | 8  | 0 | 6.490506  | -1.459297 | -2.517199 |
| 66 | 8  | 0 | 2.571345  | -3.466615 | -3.801727 |
| 67 | 8  | 0 | -2.980650 | -4.787544 | 0.454929  |
| 68 | 8  | 0 | 0.100610  | -4.699477 | 0.364596  |
| 69 | 8  | 0 | 0.160170  | -2.554589 | -3.913745 |
| 70 | 8  | 0 | -1.157893 | -0.375843 | -3.948836 |
| 71 | 8  | 0 | -6.178802 | 0.013413  | -3.786075 |
| 72 | 8  | 0 | -5.098868 | -2.409506 | -3.328120 |
| 73 | 8  | 0 | 5.092050  | -2.276971 | 3.581006  |
| 74 | 8  | 0 | -2.449113 | -2.694887 | -3.451192 |
| 75 | 8  | 0 | -1.373152 | -5.073023 | 2.572101  |
| 76 | 8  | 0 | 0.889971  | -4.392147 | -2.103746 |
| 77 | 8  | 0 | -3.936417 | -4.327352 | -1.983542 |
| 78 | 8  | 0 | 6.368544  | -0.459683 | 2.290015  |

|     |    |   |           |           |           |
|-----|----|---|-----------|-----------|-----------|
| 79  | 8  | 0 | 2.594814  | -2.615088 | 4.365255  |
| 80  | 1  | 0 | 7.665102  | 4.099464  | 1.707236  |
| 81  | 1  | 0 | 7.511915  | 3.410983  | -2.120136 |
| 82  | 1  | 0 | 8.618072  | 0.394497  | 1.581350  |
| 83  | 1  | 0 | 8.496816  | 0.130480  | -2.243887 |
| 84  | 1  | 0 | 7.655768  | -2.194294 | 3.734011  |
| 85  | 1  | 0 | 7.415313  | -3.144621 | -4.010578 |
| 86  | 1  | 0 | 4.390887  | -5.219632 | -3.393345 |
| 87  | 1  | 0 | 4.314940  | -4.523956 | 4.168202  |
| 88  | 1  | 0 | 0.866320  | -6.237473 | 2.306895  |
| 89  | 1  | 0 | 0.654576  | -6.681890 | -1.131273 |
| 90  | 1  | 0 | 4.878538  | 6.340622  | 1.685167  |
| 91  | 1  | 0 | 4.900141  | 5.792519  | -2.947337 |
| 92  | 1  | 0 | 1.274859  | 6.695790  | 1.293701  |
| 93  | 1  | 0 | 1.042952  | 6.302583  | -2.209418 |
| 94  | 1  | 0 | -3.387980 | 7.101353  | 1.594317  |
| 95  | 1  | 0 | -3.309628 | 6.497485  | -2.097115 |
| 96  | 1  | 0 | -7.091168 | 4.005847  | 1.917520  |
| 97  | 1  | 0 | -7.235586 | 3.693637  | -2.116060 |
| 98  | 1  | 0 | -7.058516 | -1.250078 | 4.248485  |
| 99  | 1  | 0 | -7.529872 | -2.064902 | -3.814326 |
| 100 | 1  | 0 | -3.641642 | -6.057340 | 2.613392  |
| 101 | 1  | 0 | -3.558678 | -6.652302 | -1.073482 |
| 102 | 1  | 0 | 6.464698  | -0.562163 | 4.796784  |
| 103 | 1  | 0 | 6.487502  | 2.968280  | 3.453687  |
| 104 | 1  | 0 | 4.344422  | -3.006984 | 5.951070  |
| 105 | 1  | 0 | 0.446526  | -3.847401 | 5.142429  |
| 106 | 1  | 0 | -3.259063 | -3.841246 | 5.093923  |
| 107 | 1  | 0 | -0.888340 | -0.532153 | 5.848070  |
| 108 | 1  | 0 | -5.732576 | -0.384762 | 6.049825  |
| 109 | 1  | 0 | -5.497591 | 2.699735  | 4.740142  |
| 110 | 1  | 0 | 1.218868  | 5.400422  | 3.360867  |
| 111 | 1  | 0 | -3.204783 | 5.486208  | 3.446845  |
| 112 | 1  | 0 | -0.901264 | 2.862512  | 4.542265  |
| 113 | 1  | 0 | -3.689701 | 5.412618  | -4.211893 |
| 114 | 1  | 0 | 1.145746  | 5.165345  | -4.280835 |
| 115 | 1  | 0 | -5.307352 | 2.137115  | -4.835750 |
| 116 | 1  | 0 | -1.698027 | 1.832776  | -5.050272 |
| 117 | 1  | 0 | 6.517689  | 2.864685  | -4.224281 |
| 118 | 1  | 0 | -5.992373 | -1.760530 | -5.618207 |
| 119 | 1  | 0 | -4.013461 | -4.392959 | -4.526317 |
| 120 | 1  | 0 | 0.596993  | -4.935319 | -4.596771 |
| 121 | 1  | 0 | 3.843454  | -4.356547 | -5.707478 |
| 122 | 1  | 0 | 6.651263  | -1.089074 | -5.071421 |
| 123 | 1  | 0 | -1.537068 | -2.055452 | -5.740103 |
| 124 | 14 | 0 | -1.234854 | 3.245637  | -1.956682 |
| 125 | 79 | 0 | -0.899749 | -0.051268 | -1.049018 |
| 126 | 79 | 0 | -0.241318 | -2.365136 | -0.006121 |
| 127 | 79 | 0 | 0.569376  | -0.072669 | 1.159977  |
| 128 | 6  | 0 | 3.350532  | 1.298314  | 0.737946  |
| 129 | 1  | 0 | 4.300396  | 1.546278  | 0.272550  |
| 130 | 1  | 0 | 3.338053  | -0.238835 | -0.043878 |
| 131 | 1  | 0 | 2.484067  | 1.837193  | 0.360448  |
| 132 | 6  | 0 | 3.381320  | 0.949303  | 2.184077  |
| 133 | 1  | 0 | 3.986242  | 0.055766  | 2.363090  |
| 134 | 1  | 0 | 3.813363  | 1.782832  | 2.758299  |
| 135 | 8  | 0 | 2.034174  | 0.733764  | 2.688088  |
| 136 | 8  | 0 | 3.486160  | -1.206915 | -0.400986 |
| 137 | 8  | 0 | 3.156538  | -2.021849 | 0.574553  |
| 138 | 1  | 0 | 2.040821  | 0.050235  | 3.377599  |

```

-----
Zero-point correction=          0.390962 (Hartree/Particle)
Thermal correction to Energy=   0.477660
Thermal correction to Enthalpy= 0.478605
Thermal correction to Gibbs Free Energy= 0.276420
Sum of electronic and zero-point Energies= -14045.101926
Sum of electronic and thermal Energies= -14045.015227
Sum of electronic and thermal Enthalpies= -14045.014283
Sum of electronic and thermal Free Energies= -14045.216467
M06-L/def2-TZVP//b3lyp/6-31G(d,p)-LANL2DZ Single point energy: -14048.479883

```

## TS2

**Charge: 1 multiplicity: 3**

```

-----
Center      Atomic      Atomic      Coordinates (Angstroms)
Number      Number      Type        X             Y             Z
-----
  1          14          0           4.370312     5.011544     0.777709
  2          14          0           6.585517     3.050950     1.752410
  3          14          0           4.267759     4.574456    -2.324324
  4          14          0           6.319719     2.410028    -2.987435
  5           8          0           5.186213     3.701740     1.255653
  6           8          0           6.731516     1.690705     0.858097
  7           8          0           4.396959     5.238237    -0.839811
  8           8          0           4.963100     3.110955    -2.403886
  9           8          0           6.141686     0.851812    -2.515608
 10          14          0          -1.658803     2.134791     3.569075
 11          14          0          -4.733382     2.086279     3.730091
 12          14          0          -5.917817     3.421795    -1.734356
 13          14          0          -3.615923     5.159734    -2.929071
 14          14          0           1.239798     4.806113    -3.068893
 15          14          0          -2.118410     0.837241    -3.941345
 16          14          0          -5.221931     1.157200    -3.704273
 17          14          0          -5.714654     3.859986     1.384449
 18          14          0          -3.381771     5.787516     1.827825
 19          14          0           1.421593     5.315859     1.667547
 20          14          0          -1.235917     3.765462     0.914098
 21           8          0          -3.163973     2.116228     4.193281
 22           8          0          -5.030397     4.674857    -2.282446
 23           8          0           0.170670     3.689764    -2.515291
 24           8          0          -2.448842     4.020605    -2.709560
 25           8          0          -5.348574     2.003313    -2.323523
 26           8          0          -1.458627     1.569440    -2.608903
 27           8          0           2.718898     4.255005    -2.696150
 28           8          0          -5.798160     3.284885    -0.128032
 29           8          0          -1.378716     2.946931    -0.478636
 30           8          0          -3.702947     0.524789    -3.786465
 31           8          0          -4.894979     5.273564     1.460484
 32           8          0           0.279988     4.301885     1.071401
 33           8          0          -2.256812     5.024975     0.895251
 34           8          0          -4.908581     2.722858     2.241006
 35           8          0          -1.666802     2.717132     2.059874
 36           8          0           2.871451     4.678433     1.304720
 37          14          0           7.183555     0.141935     1.014609
 38          14          0           7.004716    -0.427292    -1.989061
 39           8          0           6.939920    -0.647909    -0.378590
 40          14          0           0.968356    -2.975742     4.126206
 41          14          0          -1.054715    -0.703848     4.426857

```

|     |    |   |           |           |           |
|-----|----|---|-----------|-----------|-----------|
| 42  | 14 | 0 | -5.797198 | -0.605171 | 4.735389  |
| 43  | 14 | 0 | 3.765029  | -4.377709 | -4.252144 |
| 44  | 14 | 0 | -3.574040 | -2.684138 | 4.227434  |
| 45  | 14 | 0 | 6.243162  | -2.448395 | -4.086653 |
| 46  | 14 | 0 | -3.247752 | -5.363670 | -0.878584 |
| 47  | 14 | 0 | -0.167094 | -5.477383 | -0.999960 |
| 48  | 14 | 0 | 0.806693  | -4.112355 | -3.580514 |
| 49  | 14 | 0 | -1.480599 | -2.154408 | -4.266240 |
| 50  | 14 | 0 | -6.409090 | -1.657477 | -4.066301 |
| 51  | 14 | 0 | 4.039177  | -3.174133 | 4.542514  |
| 52  | 14 | 0 | -4.096733 | -3.585855 | -3.238618 |
| 53  | 14 | 0 | 6.397427  | -1.488522 | 3.524951  |
| 54  | 14 | 0 | -3.091623 | -4.837052 | 2.247547  |
| 55  | 14 | 0 | 0.005688  | -5.029965 | 2.115210  |
| 56  | 8  | 0 | 0.224230  | -1.555920 | 3.896289  |
| 57  | 8  | 0 | -1.083616 | 0.611550  | 3.472891  |
| 58  | 8  | 0 | -5.260218 | 0.543699  | 3.689676  |
| 59  | 8  | 0 | -4.982131 | -2.008844 | 4.594916  |
| 60  | 8  | 0 | 4.776666  | -3.111814 | -4.256151 |
| 61  | 8  | 0 | -2.412179 | -1.554392 | 4.218600  |
| 62  | 8  | 0 | -1.721863 | -5.504321 | -1.479985 |
| 63  | 8  | 0 | 0.888868  | -3.802953 | 2.709507  |
| 64  | 8  | 0 | -3.654756 | -3.396705 | 2.755729  |
| 65  | 8  | 0 | 6.322737  | -1.760856 | -2.603350 |
| 66  | 8  | 0 | 2.352745  | -3.723017 | -3.757497 |
| 67  | 8  | 0 | -3.170081 | -4.773129 | 0.629465  |
| 68  | 8  | 0 | -0.018296 | -4.730629 | 0.480924  |
| 69  | 8  | 0 | -0.038833 | -2.763041 | -3.870263 |
| 70  | 8  | 0 | -1.306118 | -0.564851 | -3.932621 |
| 71  | 8  | 0 | -6.304518 | -0.053266 | -3.723021 |
| 72  | 8  | 0 | -5.285256 | -2.484723 | -3.202547 |
| 73  | 8  | 0 | 5.016519  | -2.358451 | 3.529475  |
| 74  | 8  | 0 | -2.643759 | -2.837209 | -3.357336 |
| 75  | 8  | 0 | -1.512636 | -5.030320 | 2.705757  |
| 76  | 8  | 0 | 0.682661  | -4.545161 | -2.004952 |
| 77  | 8  | 0 | -4.139921 | -4.383214 | -1.813043 |
| 78  | 8  | 0 | 6.305284  | -0.580528 | 2.174956  |
| 79  | 8  | 0 | 2.517303  | -2.605517 | 4.374396  |
| 80  | 1  | 0 | 7.699423  | 3.900192  | 1.411641  |
| 81  | 1  | 0 | 7.467770  | 3.090114  | -2.387867 |
| 82  | 1  | 0 | 8.568554  | 0.172615  | 1.393710  |
| 83  | 1  | 0 | 8.378179  | -0.214008 | -2.418283 |
| 84  | 1  | 0 | 7.585413  | -2.321837 | 3.646056  |
| 85  | 1  | 0 | 7.195876  | -3.520168 | -4.057986 |
| 86  | 1  | 0 | 4.137202  | -5.505221 | -3.324440 |
| 87  | 1  | 0 | 4.201859  | -4.560229 | 4.210155  |
| 88  | 1  | 0 | 0.686004  | -6.255862 | 2.461561  |
| 89  | 1  | 0 | 0.407666  | -6.807976 | -0.956259 |
| 90  | 1  | 0 | 4.962816  | 6.201602  | 1.359334  |
| 91  | 1  | 0 | 4.895608  | 5.501376  | -3.252184 |
| 92  | 1  | 0 | 1.361809  | 6.624754  | 1.013401  |
| 93  | 1  | 0 | 1.063367  | 6.122111  | -2.470640 |
| 94  | 1  | 0 | -3.285376 | 7.144806  | 1.374167  |
| 95  | 1  | 0 | -3.281519 | 6.418461  | -2.295937 |
| 96  | 1  | 0 | -7.049834 | 4.145702  | 1.858495  |
| 97  | 1  | 0 | -7.267860 | 3.704594  | -2.159740 |
| 98  | 1  | 0 | -7.094009 | -1.030292 | 4.361797  |
| 99  | 1  | 0 | -7.716693 | -2.098497 | -3.661101 |
| 100 | 1  | 0 | -3.811222 | -5.964384 | 2.833233  |
| 101 | 1  | 0 | -3.802441 | -6.681699 | -0.832806 |

|     |    |   |           |           |           |
|-----|----|---|-----------|-----------|-----------|
| 102 | 1  | 0 | 6.448247  | -0.629284 | 4.672752  |
| 103 | 1  | 0 | 6.526356  | 2.853755  | 3.213118  |
| 104 | 1  | 0 | 4.294164  | -2.986580 | 5.941015  |
| 105 | 1  | 0 | 0.365930  | -3.765050 | 5.222399  |
| 106 | 1  | 0 | -3.338944 | -3.677194 | 5.232450  |
| 107 | 1  | 0 | -0.884031 | -0.399461 | 5.838650  |
| 108 | 1  | 0 | -5.719745 | -0.136318 | 6.112195  |
| 109 | 1  | 0 | -5.438815 | 2.897398  | 4.697299  |
| 110 | 1  | 0 | 1.311596  | 5.399507  | 3.123040  |
| 111 | 1  | 0 | -3.107044 | 5.587611  | 3.276130  |
| 112 | 1  | 0 | -0.843949 | 2.950175  | 4.421491  |
| 113 | 1  | 0 | -3.720233 | 5.273665  | -4.367327 |
| 114 | 1  | 0 | 1.106740  | 4.915429  | -4.504536 |
| 115 | 1  | 0 | -5.419611 | 2.016646  | -4.856447 |
| 116 | 1  | 0 | -1.821883 | 1.624321  | -5.117879 |
| 117 | 1  | 0 | 6.427074  | 2.497567  | -4.456722 |
| 118 | 1  | 0 | -6.202970 | -1.888168 | -5.498198 |
| 119 | 1  | 0 | -4.264554 | -4.527226 | -4.351032 |
| 120 | 1  | 0 | 0.331091  | -5.175217 | -4.476417 |
| 121 | 1  | 0 | 3.570620  | -4.706444 | -5.656984 |
| 122 | 1  | 0 | 6.459694  | -1.483874 | -5.174222 |
| 123 | 1  | 0 | -1.757859 | -2.287133 | -5.680773 |
| 124 | 14 | 0 | -1.272307 | 3.124592  | -2.075903 |
| 125 | 79 | 0 | -0.579108 | -0.132465 | -1.179284 |
| 126 | 79 | 0 | 0.092123  | -2.292388 | 0.148120  |
| 127 | 79 | 0 | 0.778691  | 0.172244  | 1.125834  |
| 128 | 6  | 0 | 3.577057  | 1.829115  | 4.090032  |
| 129 | 1  | 0 | 4.588793  | 1.485754  | 4.321821  |
| 130 | 1  | 0 | 3.622604  | 2.859482  | 3.728375  |
| 131 | 1  | 0 | 2.987710  | 1.814301  | 5.016120  |
| 132 | 6  | 0 | 2.938015  | 0.932843  | 3.047737  |
| 133 | 1  | 0 | 3.713570  | 0.890954  | 1.827756  |
| 134 | 1  | 0 | 3.039582  | -0.153247 | 3.228117  |
| 135 | 8  | 0 | 1.736918  | 1.319252  | 2.632807  |
| 136 | 8  | 0 | 3.000212  | 1.197634  | 0.020525  |
| 137 | 8  | 0 | 4.058629  | 0.660011  | 0.728669  |
| 138 | 1  | 0 | 3.153020  | 0.845848  | -0.880898 |

-----

Zero-point correction= 0.388432 (Hartree/Particle)  
 Thermal correction to Energy= 0.475143  
 Thermal correction to Enthalpy= 0.476087  
 Thermal correction to Gibbs Free Energy= 0.275291  
 Sum of electronic and zero-point Energies= -14045.088132  
 Sum of electronic and thermal Energies= -14045.001421  
 Sum of electronic and thermal Enthalpies= -14045.000477  
 Sum of electronic and thermal Free Energies= -14045.218947

M06-L/def2-TZVP//b3lyp/6-31G(d,p)-LANL2DZ Single point energy: -14048.487693

## TS2a

**Charge: 1 multiplicity: 3**

-----

| Center<br>Number | Atomic<br>Number | Atomic<br>Type | Coordinates (Angstroms) |          |           |
|------------------|------------------|----------------|-------------------------|----------|-----------|
|                  |                  |                | X                       | Y        | Z         |
| 1                | 14               | 0              | 4.341202                | 5.042199 | 0.681705  |
| 2                | 14               | 0              | 6.567140                | 3.097399 | 1.673265  |
| 3                | 14               | 0              | 4.232912                | 4.572536 | -2.410437 |
| 4                | 14               | 0              | 6.290708                | 2.412400 | -3.060955 |



|    |    |   |           |           |           |
|----|----|---|-----------|-----------|-----------|
| 5  | 8  | 0 | 5.167523  | 3.745801  | 1.177333  |
| 6  | 8  | 0 | 6.754052  | 1.735747  | 0.790148  |
| 7  | 8  | 0 | 4.358924  | 5.260798  | -0.933861 |
| 8  | 8  | 0 | 4.946624  | 3.124328  | -2.474049 |
| 9  | 8  | 0 | 6.134418  | 0.853967  | -2.595175 |
| 10 | 14 | 0 | -1.672595 | 2.164064  | 3.525247  |
| 11 | 14 | 0 | -4.745148 | 2.101826  | 3.693409  |
| 12 | 14 | 0 | -5.947752 | 3.387978  | -1.779641 |
| 13 | 14 | 0 | -3.659496 | 5.118898  | -2.995664 |
| 14 | 14 | 0 | 1.204170  | 4.787650  | -3.148335 |
| 15 | 14 | 0 | -2.128345 | 0.794653  | -3.962357 |
| 16 | 14 | 0 | -5.239542 | 1.106642  | -3.727710 |
| 17 | 14 | 0 | -5.737365 | 3.854737  | 1.335400  |
| 18 | 14 | 0 | -3.414692 | 5.793811  | 1.754292  |
| 19 | 14 | 0 | 1.396503  | 5.340144  | 1.581713  |
| 20 | 14 | 0 | -1.263439 | 3.770525  | 0.855281  |
| 21 | 8  | 0 | -3.172832 | 2.126764  | 4.154724  |
| 22 | 8  | 0 | -5.075409 | 4.645023  | -2.342993 |
| 23 | 8  | 0 | 0.124688  | 3.688596  | -2.580210 |
| 24 | 8  | 0 | -2.502765 | 3.970651  | -2.760315 |
| 25 | 8  | 0 | -5.374573 | 1.967183  | -2.355876 |
| 26 | 8  | 0 | -1.465473 | 1.532836  | -2.627400 |
| 27 | 8  | 0 | 2.682975  | 4.248609  | -2.771677 |
| 28 | 8  | 0 | -5.817245 | 3.267458  | -0.171707 |
| 29 | 8  | 0 | -1.397478 | 2.934098  | -0.527297 |
| 30 | 8  | 0 | -3.714855 | 0.489466  | -3.795213 |
| 31 | 8  | 0 | -4.929953 | 5.275527  | 1.403694  |
| 32 | 8  | 0 | 0.244217  | 4.325484  | 1.009951  |
| 33 | 8  | 0 | -2.299072 | 5.017372  | 0.822413  |
| 34 | 8  | 0 | -4.921066 | 2.729654  | 2.201464  |
| 35 | 8  | 0 | -1.687656 | 2.729406  | 2.012286  |
| 36 | 8  | 0 | 2.842396  | 4.696711  | 1.213556  |
| 37 | 14 | 0 | 7.178636  | 0.186342  | 0.951277  |
| 38 | 14 | 0 | 6.985827  | -0.413441 | -2.045730 |
| 39 | 8  | 0 | 6.918435  | -0.616707 | -0.427579 |
| 40 | 14 | 0 | 0.979241  | -2.936204 | 4.118807  |
| 41 | 14 | 0 | -1.061283 | -0.669262 | 4.408793  |
| 42 | 14 | 0 | -5.794019 | -0.582810 | 4.728378  |
| 43 | 14 | 0 | 3.761292  | -4.399411 | -4.252455 |
| 44 | 14 | 0 | -3.569562 | -2.657424 | 4.231628  |
| 45 | 14 | 0 | 6.230623  | -2.458335 | -4.112105 |
| 46 | 14 | 0 | -3.240508 | -5.382535 | -0.851162 |
| 47 | 14 | 0 | -0.162636 | -5.487996 | -0.982401 |
| 48 | 14 | 0 | 0.802199  | -4.138896 | -3.574548 |
| 49 | 14 | 0 | -1.492481 | -2.194032 | -4.272610 |
| 50 | 14 | 0 | -6.423555 | -1.717961 | -4.061548 |
| 51 | 14 | 0 | 4.049634  | -3.110172 | 4.529276  |
| 52 | 14 | 0 | -4.099799 | -3.628108 | -3.224571 |
| 53 | 14 | 0 | 6.400201  | -1.426303 | 3.487281  |
| 54 | 14 | 0 | -3.075281 | -4.826579 | 2.270414  |
| 55 | 14 | 0 | 0.019132  | -5.009180 | 2.129482  |
| 56 | 8  | 0 | 0.215721  | -1.525621 | 3.877619  |
| 57 | 8  | 0 | -1.055802 | 0.652153  | 3.458395  |
| 58 | 8  | 0 | -5.266991 | 0.557379  | 3.667875  |
| 59 | 8  | 0 | -4.980259 | -1.989338 | 4.600045  |
| 60 | 8  | 0 | 4.767827  | -3.131741 | -4.273619 |
| 61 | 8  | 0 | -2.425566 | -1.505070 | 4.205176  |
| 62 | 8  | 0 | -1.717803 | -5.528865 | -1.458358 |
| 63 | 8  | 0 | 0.904130  | -3.776765 | 2.711368  |
| 64 | 8  | 0 | -3.643982 | -3.383176 | 2.767195  |

|     |    |   |           |           |           |
|-----|----|---|-----------|-----------|-----------|
| 65  | 8  | 0 | 6.320664  | -1.767192 | -2.631770 |
| 66  | 8  | 0 | 2.346945  | -3.753223 | -3.754196 |
| 67  | 8  | 0 | -3.155082 | -4.777473 | 0.652158  |
| 68  | 8  | 0 | -0.020604 | -4.729515 | 0.493025  |
| 69  | 8  | 0 | -0.050344 | -2.798124 | -3.872804 |
| 70  | 8  | 0 | -1.319242 | -0.603987 | -3.961111 |
| 71  | 8  | 0 | -6.315001 | -0.111307 | -3.732174 |
| 72  | 8  | 0 | -5.296619 | -2.536103 | -3.193357 |
| 73  | 8  | 0 | 5.016973  | -2.296964 | 3.495896  |
| 74  | 8  | 0 | -2.651694 | -2.873142 | -3.352115 |
| 75  | 8  | 0 | -1.495304 | -5.004868 | 2.731551  |
| 76  | 8  | 0 | 0.675251  | -4.549294 | -1.990329 |
| 77  | 8  | 0 | -4.137093 | -4.411503 | -1.789574 |
| 78  | 8  | 0 | 6.266604  | -0.568122 | 2.091660  |
| 79  | 8  | 0 | 2.524532  | -2.556236 | 4.363400  |
| 80  | 1  | 0 | 7.676535  | 3.947057  | 1.322646  |
| 81  | 1  | 0 | 7.437210  | 3.100643  | -2.468457 |
| 82  | 1  | 0 | 8.560816  | 0.223029  | 1.336895  |
| 83  | 1  | 0 | 8.361006  | -0.199900 | -2.470757 |
| 84  | 1  | 0 | 7.594378  | -2.254271 | 3.615249  |
| 85  | 1  | 0 | 7.187471  | -3.525976 | -4.076124 |
| 86  | 1  | 0 | 4.139058  | -5.516485 | -3.315165 |
| 87  | 1  | 0 | 4.221632  | -4.501005 | 4.210079  |
| 88  | 1  | 0 | 0.707688  | -6.227114 | 2.487658  |
| 89  | 1  | 0 | 0.421729  | -6.812206 | -0.924042 |
| 90  | 1  | 0 | 4.930417  | 6.236765  | 1.256917  |
| 91  | 1  | 0 | 4.852741  | 5.493291  | -3.347663 |
| 92  | 1  | 0 | 1.326728  | 6.642069  | 0.917601  |
| 93  | 1  | 0 | 1.020273  | 6.105746  | -2.560718 |
| 94  | 1  | 0 | -3.321479 | 7.146618  | 1.287112  |
| 95  | 1  | 0 | -3.325263 | 6.386095  | -2.376063 |
| 96  | 1  | 0 | -7.072250 | 4.136925  | 1.810375  |
| 97  | 1  | 0 | -7.300084 | 3.657477  | -2.202920 |
| 98  | 1  | 0 | -7.088063 | -1.015633 | 4.361905  |
| 99  | 1  | 0 | -7.729565 | -2.161137 | -3.648838 |
| 100 | 1  | 0 | -3.789598 | -5.950416 | 2.869764  |
| 101 | 1  | 0 | -3.788483 | -6.701853 | -0.789444 |
| 102 | 1  | 0 | 6.453286  | -0.556840 | 4.629458  |
| 103 | 1  | 0 | 6.512959  | 2.912720  | 3.137220  |
| 104 | 1  | 0 | 4.312515  | -2.910919 | 5.925926  |
| 105 | 1  | 0 | 0.385430  | -3.711976 | 5.226098  |
| 106 | 1  | 0 | -3.319727 | -3.639053 | 5.246177  |
| 107 | 1  | 0 | -0.876470 | -0.345882 | 5.814627  |
| 108 | 1  | 0 | -5.712406 | -0.099807 | 6.099868  |
| 109 | 1  | 0 | -5.447951 | 2.921694  | 4.655956  |
| 110 | 1  | 0 | 1.287614  | 5.436358  | 3.038699  |
| 111 | 1  | 0 | -3.131297 | 5.607967  | 3.202968  |
| 112 | 1  | 0 | -0.854155 | 2.990525  | 4.366216  |
| 113 | 1  | 0 | -3.765285 | 5.220260  | -4.435405 |
| 114 | 1  | 0 | 1.062692  | 4.880333  | -4.583403 |
| 115 | 1  | 0 | -5.452763 | 1.951958  | -4.889187 |
| 116 | 1  | 0 | -1.854234 | 1.571800  | -5.157485 |
| 117 | 1  | 0 | 6.392966  | 2.484612  | -4.528646 |
| 118 | 1  | 0 | -6.222029 | -1.961816 | -5.492238 |
| 119 | 1  | 0 | -4.269552 | -4.582180 | -4.326220 |
| 120 | 1  | 0 | 0.328318  | -5.212675 | -4.459018 |
| 121 | 1  | 0 | 3.562482  | -4.741803 | -5.653380 |
| 122 | 1  | 0 | 6.439763  | -1.503185 | -5.209118 |
| 123 | 1  | 0 | -1.775873 | -2.344442 | -5.684103 |
| 124 | 14 | 0 | -1.302424 | 3.104490  | -2.128821 |

|     |    |   |           |           |           |
|-----|----|---|-----------|-----------|-----------|
| 125 | 79 | 0 | -0.570149 | -0.027470 | -1.058781 |
| 126 | 79 | 0 | 0.083980  | -2.290766 | 0.119033  |
| 127 | 79 | 0 | 0.968019  | -0.014783 | 1.217496  |
| 128 | 6  | 0 | 3.100800  | 2.483664  | 4.200151  |
| 129 | 1  | 0 | 3.357424  | 2.195848  | 5.223820  |
| 130 | 1  | 0 | 4.021920  | 2.565355  | 3.616523  |
| 131 | 1  | 0 | 2.644203  | 3.485948  | 4.233016  |
| 132 | 6  | 0 | 2.176054  | 1.459479  | 3.611597  |
| 133 | 1  | 0 | 3.121219  | 1.581541  | 1.442407  |
| 134 | 1  | 0 | 1.341549  | 1.100904  | 4.212011  |
| 135 | 8  | 0 | 1.884181  | 1.597426  | 2.287369  |
| 136 | 8  | 0 | 3.636441  | -0.154062 | 0.857481  |
| 137 | 8  | 0 | 3.987770  | 1.198744  | 1.043691  |
| 138 | 1  | 0 | 4.322027  | -0.606620 | 1.400542  |

-----

Zero-point correction= 0.391330 (Hartree/Particle)  
 Thermal correction to Energy= 0.477819  
 Thermal correction to Enthalpy= 0.478763  
 Thermal correction to Gibbs Free Energy= 0.279431  
 Sum of electronic and zero-point Energies= -14045.087908  
 Sum of electronic and thermal Energies= -14045.001419  
 Sum of electronic and thermal Enthalpies= -14045.000475  
 Sum of electronic and thermal Free Energies= -14045.199807

M06-L/def2-TZVP//b3lyp/6-31G(d,p)-LANL2DZ Single point energy: -14048.4713111

### TS3

Charge: 1 multiplicity: 3

-----

| Center<br>Number | Atomic<br>Number | Atomic<br>Type | Coordinates (Angstroms) |          |           |
|------------------|------------------|----------------|-------------------------|----------|-----------|
|                  |                  |                | X                       | Y        | Z         |
| 1                | 14               | 0              | 4.324025                | 5.005414 | 0.822025  |
| 2                | 14               | 0              | 6.528757                | 3.025800 | 1.797197  |
| 3                | 14               | 0              | 4.223543                | 4.583852 | -2.282892 |
| 4                | 14               | 0              | 6.280422                | 2.409268 | -2.948264 |
| 5                | 8                | 0              | 5.135385                | 3.695058 | 1.301100  |
| 6                | 8                | 0              | 6.630764                | 1.662780 | 0.898339  |
| 7                | 8                | 0              | 4.351562                | 5.237398 | -0.794986 |
| 8                | 8                | 0              | 4.912511                | 3.106546 | -2.361159 |
| 9                | 8                | 0              | 6.089990                | 0.858619 | -2.464936 |
| 10               | 14               | 0              | -1.726438               | 2.122838 | 3.589406  |
| 11               | 14               | 0              | -4.801628               | 2.078981 | 3.739469  |
| 12               | 14               | 0              | -5.965330               | 3.447879 | -1.726029 |
| 13               | 14               | 0              | -3.654766               | 5.180468 | -2.906987 |
| 14               | 14               | 0              | 1.200691                | 4.823759 | -3.036276 |
| 15               | 14               | 0              | -2.137188               | 0.865546 | -3.917442 |
| 16               | 14               | 0              | -5.252709               | 1.191891 | -3.701720 |
| 17               | 14               | 0              | -5.767531               | 3.864969 | 1.393530  |
| 18               | 14               | 0              | -3.421180               | 5.793562 | 1.849812  |
| 19               | 14               | 0              | 1.369579                | 5.316940 | 1.706068  |
| 20               | 14               | 0              | -1.280355               | 3.766550 | 0.947282  |
| 21               | 8                | 0              | -3.231850               | 2.097446 | 4.207250  |
| 22               | 8                | 0              | -5.071953               | 4.704866 | -2.259010 |
| 23               | 8                | 0              | 0.121130                | 3.729670 | -2.475034 |
| 24               | 8                | 0              | -2.502073               | 4.022777 | -2.687746 |
| 25               | 8                | 0              | -5.397974               | 2.033855 | -2.320423 |
| 26               | 8                | 0              | -1.451442               | 1.581677 | -2.583475 |
| 27               | 8                | 0              | 2.682106                | 4.267146 | -2.672164 |

|    |    |   |           |           |           |
|----|----|---|-----------|-----------|-----------|
| 28 | 8  | 0 | -5.857199 | 3.295321  | -0.119915 |
| 29 | 8  | 0 | -1.428644 | 2.963886  | -0.452285 |
| 30 | 8  | 0 | -3.727073 | 0.575803  | -3.756342 |
| 31 | 8  | 0 | -4.922716 | 5.265182  | 1.460564  |
| 32 | 8  | 0 | 0.254471  | 4.259032  | 1.131904  |
| 33 | 8  | 0 | -2.260629 | 5.057505  | 0.935240  |
| 34 | 8  | 0 | -4.971984 | 2.722420  | 2.252191  |
| 35 | 8  | 0 | -1.735281 | 2.722882  | 2.085410  |
| 36 | 8  | 0 | 2.826460  | 4.685300  | 1.363577  |
| 37 | 14 | 0 | 7.114625  | 0.118109  | 1.058363  |
| 38 | 14 | 0 | 6.950268  | -0.434579 | -1.952994 |
| 39 | 8  | 0 | 6.878105  | -0.656595 | -0.345713 |
| 40 | 14 | 0 | 0.886960  | -2.997732 | 4.127605  |
| 41 | 14 | 0 | -1.138149 | -0.710787 | 4.430823  |
| 42 | 14 | 0 | -5.873395 | -0.613883 | 4.730392  |
| 43 | 14 | 0 | 3.707715  | -4.366866 | -4.244088 |
| 44 | 14 | 0 | -3.657004 | -2.674098 | 4.225256  |
| 45 | 14 | 0 | 6.189114  | -2.444389 | -4.065985 |
| 46 | 14 | 0 | -3.321093 | -5.346035 | -0.892607 |
| 47 | 14 | 0 | -0.242816 | -5.474453 | -1.011333 |
| 48 | 14 | 0 | 0.747615  | -4.095929 | -3.582872 |
| 49 | 14 | 0 | -1.530558 | -2.125662 | -4.267334 |
| 50 | 14 | 0 | -6.457351 | -1.621985 | -4.079973 |
| 51 | 14 | 0 | 3.947440  | -3.194162 | 4.556905  |
| 52 | 14 | 0 | -4.152318 | -3.558037 | -3.252547 |
| 53 | 14 | 0 | 6.315552  | -1.520955 | 3.556956  |
| 54 | 14 | 0 | -3.163705 | -4.828830 | 2.236596  |
| 55 | 14 | 0 | -0.064166 | -5.030166 | 2.106914  |
| 56 | 8  | 0 | 0.081182  | -1.619677 | 3.871173  |
| 57 | 8  | 0 | -1.108887 | 0.619918  | 3.491999  |
| 58 | 8  | 0 | -5.328242 | 0.537891  | 3.690621  |
| 59 | 8  | 0 | -5.086525 | -2.034033 | 4.584120  |
| 60 | 8  | 0 | 4.722975  | -3.103627 | -4.243718 |
| 61 | 8  | 0 | -2.543999 | -1.493227 | 4.236429  |
| 62 | 8  | 0 | -1.795161 | -5.494460 | -1.494287 |
| 63 | 8  | 0 | 0.840160  | -3.828807 | 2.710206  |
| 64 | 8  | 0 | -3.708351 | -3.382110 | 2.748636  |
| 65 | 8  | 0 | 6.267169  | -1.757450 | -2.582357 |
| 66 | 8  | 0 | 2.295976  | -3.713427 | -3.748443 |
| 67 | 8  | 0 | -3.244779 | -4.759925 | 0.617041  |
| 68 | 8  | 0 | -0.095123 | -4.725338 | 0.468610  |
| 69 | 8  | 0 | -0.094373 | -2.746282 | -3.868274 |
| 70 | 8  | 0 | -1.341691 | -0.541080 | -3.938187 |
| 71 | 8  | 0 | -6.332943 | -0.020848 | -3.731826 |
| 72 | 8  | 0 | -5.343333 | -2.460173 | -3.215489 |
| 73 | 8  | 0 | 4.945618  | -2.399796 | 3.548425  |
| 74 | 8  | 0 | -2.699699 | -2.807816 | -3.363192 |
| 75 | 8  | 0 | -1.585640 | -5.029316 | 2.691093  |
| 76 | 8  | 0 | 0.610703  | -4.535786 | -2.008626 |
| 77 | 8  | 0 | -4.202989 | -4.358832 | -1.828756 |
| 78 | 8  | 0 | 6.239118  | -0.618161 | 2.201861  |
| 79 | 8  | 0 | 2.425525  | -2.623590 | 4.406318  |
| 80 | 1  | 0 | 7.645230  | 3.881381  | 1.462374  |
| 81 | 1  | 0 | 7.423538  | 3.085975  | -2.340826 |
| 82 | 1  | 0 | 8.505244  | 0.151759  | 1.433313  |
| 83 | 1  | 0 | 8.325909  | -0.220248 | -2.380669 |
| 84 | 1  | 0 | 7.508893  | -2.348592 | 3.673278  |
| 85 | 1  | 0 | 7.140640  | -3.517373 | -4.036350 |
| 86 | 1  | 0 | 4.074802  | -5.497573 | -3.319784 |
| 87 | 1  | 0 | 4.118088  | -4.580693 | 4.218440  |

|     |    |   |           |           |           |
|-----|----|---|-----------|-----------|-----------|
| 88  | 1  | 0 | 0.603477  | -6.261012 | 2.452515  |
| 89  | 1  | 0 | 0.334711  | -6.799949 | -0.968156 |
| 90  | 1  | 0 | 4.914478  | 6.189732  | 1.410041  |
| 91  | 1  | 0 | 4.860051  | 5.506782  | -3.204239 |
| 92  | 1  | 0 | 1.315620  | 6.623051  | 1.054391  |
| 93  | 1  | 0 | 1.026909  | 6.134058  | -2.432420 |
| 94  | 1  | 0 | -3.331379 | 7.153222  | 1.402508  |
| 95  | 1  | 0 | -3.317770 | 6.440492  | -2.270259 |
| 96  | 1  | 0 | -7.104702 | 4.161690  | 1.863867  |
| 97  | 1  | 0 | -7.311160 | 3.736029  | -2.156646 |
| 98  | 1  | 0 | -7.169489 | -1.023441 | 4.347769  |
| 99  | 1  | 0 | -7.769557 | -2.060324 | -3.680955 |
| 100 | 1  | 0 | -3.894071 | -5.959951 | 2.811194  |
| 101 | 1  | 0 | -3.875510 | -6.663659 | -0.857447 |
| 102 | 1  | 0 | 6.372666  | -0.657054 | 4.702687  |
| 103 | 1  | 0 | 6.463931  | 2.831173  | 3.256259  |
| 104 | 1  | 0 | 4.208815  | -3.013705 | 5.955412  |
| 105 | 1  | 0 | 0.280960  | -3.779805 | 5.221609  |
| 106 | 1  | 0 | -3.423700 | -3.682823 | 5.220357  |
| 107 | 1  | 0 | -0.962651 | -0.413435 | 5.846426  |
| 108 | 1  | 0 | -5.798538 | -0.139358 | 6.105778  |
| 109 | 1  | 0 | -5.505702 | 2.898876  | 4.703048  |
| 110 | 1  | 0 | 1.255766  | 5.390135  | 3.159302  |
| 111 | 1  | 0 | -3.162865 | 5.588583  | 3.299225  |
| 112 | 1  | 0 | -0.909866 | 2.941322  | 4.441874  |
| 113 | 1  | 0 | -3.752760 | 5.304457  | -4.347163 |
| 114 | 1  | 0 | 1.073703  | 4.934856  | -4.470659 |
| 115 | 1  | 0 | -5.458579 | 2.053492  | -4.853766 |
| 116 | 1  | 0 | -1.861128 | 1.653413  | -5.105482 |
| 117 | 1  | 0 | 6.387899  | 2.503683  | -4.415123 |
| 118 | 1  | 0 | -6.249551 | -1.846937 | -5.512500 |
| 119 | 1  | 0 | -4.321254 | -4.495001 | -4.369062 |
| 120 | 1  | 0 | 0.273153  | -5.153893 | -4.482450 |
| 121 | 1  | 0 | 3.517522  | -4.688745 | -5.651104 |
| 122 | 1  | 0 | 6.412981  | -1.475140 | -5.147309 |
| 123 | 1  | 0 | -1.804878 | -2.256210 | -5.682631 |
| 124 | 14 | 0 | -1.315590 | 3.140178  | -2.051018 |
| 125 | 79 | 0 | -0.347576 | -0.006005 | -1.107538 |
| 126 | 79 | 0 | 0.106422  | -2.345458 | 0.019645  |
| 127 | 79 | 0 | 1.256406  | -0.135628 | 1.090555  |
| 128 | 6  | 0 | 3.448929  | 2.146143  | 4.064119  |
| 129 | 1  | 0 | 3.874453  | 3.135449  | 3.881760  |
| 130 | 1  | 0 | 2.824152  | 2.197164  | 4.965159  |
| 131 | 1  | 0 | 4.257998  | 1.436641  | 4.256784  |
| 132 | 6  | 0 | 2.627976  | 1.712887  | 2.874477  |
| 133 | 1  | 0 | 1.904262  | 2.458578  | 2.505631  |
| 134 | 1  | 0 | 3.224004  | 1.610667  | 1.591004  |
| 135 | 8  | 0 | 2.183832  | 0.454910  | 2.914306  |
| 136 | 8  | 0 | 3.078642  | 2.036176  | -0.460823 |
| 137 | 8  | 0 | 3.297599  | 1.055625  | 0.512387  |
| 138 | 1  | 0 | 3.703004  | 1.779277  | -1.171264 |

-----

|                                              |                             |
|----------------------------------------------|-----------------------------|
| Zero-point correction=                       | 0.388809 (Hartree/Particle) |
| Thermal correction to Energy=                | 0.475289                    |
| Thermal correction to Enthalpy=              | 0.476233                    |
| Thermal correction to Gibbs Free Energy=     | 0.276689                    |
| Sum of electronic and zero-point Energies=   | -14045.091208               |
| Sum of electronic and thermal Energies=      | -14045.004728               |
| Sum of electronic and thermal Enthalpies=    | -14045.003783               |
| Sum of electronic and thermal Free Energies= | -14045.203328               |

M06-L/def2-TZVP//b3lyp/6-31G(d,p)-LANL2DZ Single point energy: -14048.4912976

**Au<sub>3</sub><sup>+</sup>**

**Charge: 1 multiplicity: 1**

| Center Number | Atomic Number | Atomic Type | Coordinates (Angstroms) |           |          |
|---------------|---------------|-------------|-------------------------|-----------|----------|
|               |               |             | X                       | Y         | Z        |
| 1             | 79            | 0           | 1.352217                | -0.780661 | 0.000000 |
| 2             | 79            | 0           | 0.000000                | 1.561367  | 0.000000 |
| 3             | 79            | 0           | -1.352217               | -0.780706 | 0.000000 |

Zero-point correction= 0.000819 (Hartree/Particle)  
Thermal correction to Energy= 0.005748  
Thermal correction to Enthalpy= 0.006692  
Thermal correction to Gibbs Free Energy= -0.034347  
Sum of electronic and zero-point Energies= -406.152748  
Sum of electronic and thermal Energies= -406.147819  
Sum of electronic and thermal Enthalpies= -406.146875  
Sum of electronic and thermal Free Energies= -406.187914

M06-L/def2-TZVP//b3lyp/6-31G(d,p)-LANL2DZ Single point energy: -407.277437

**INT1'**

**Charge: 1 multiplicity: 1**

| Center Number | Atomic Number | Atomic Type | Coordinates (Angstroms) |           |           |
|---------------|---------------|-------------|-------------------------|-----------|-----------|
|               |               |             | X                       | Y         | Z         |
| 1             | 79            | 0           | 1.308065                | -1.308477 | 0.067229  |
| 2             | 79            | 0           | 1.240271                | 1.345163  | 0.044359  |
| 3             | 79            | 0           | -1.095146               | -0.040801 | -0.167106 |
| 4             | 6             | 0           | -5.622894               | -0.153652 | 0.309305  |
| 5             | 1             | 0           | -6.305205               | 0.163589  | 1.104341  |
| 6             | 1             | 0           | -5.979718               | 0.295275  | -0.624283 |
| 7             | 1             | 0           | -5.674268               | -1.242077 | 0.225805  |
| 8             | 6             | 0           | -4.220796               | 0.305327  | 0.649400  |
| 9             | 1             | 0           | -4.146081               | 1.393630  | 0.734309  |
| 10            | 1             | 0           | -3.850854               | -0.151900 | 1.568191  |
| 11            | 8             | 0           | -3.273824               | -0.146892 | -0.389210 |
| 12            | 1             | 0           | -3.593182               | 0.131620  | -1.261035 |

Zero-point correction= 0.082838 (Hartree/Particle)  
Thermal correction to Energy= 0.093626  
Thermal correction to Enthalpy= 0.094571  
Thermal correction to Gibbs Free Energy= 0.038070  
Sum of electronic and zero-point Energies= -561.174017  
Sum of electronic and thermal Energies= -561.163229  
Sum of electronic and thermal Enthalpies= -561.162284  
Sum of electronic and thermal Free Energies= -561.218785

M06-L/def2-TZVP//b3lyp/6-31G(d,p)-LANL2DZ Single point energy: -562.376860

**INT2'**

**Charge: 1 multiplicity: 3**

| Center | Atomic | Atomic | Coordinates (Angstroms) |  |  |
|--------|--------|--------|-------------------------|--|--|
|--------|--------|--------|-------------------------|--|--|

| Number | Number | Type | X         | Y         | Z         |
|--------|--------|------|-----------|-----------|-----------|
| 1      | 79     | 0    | 0.499920  | 1.812697  | 0.063185  |
| 2      | 79     | 0    | 1.369976  | -0.695163 | 0.142520  |
| 3      | 79     | 0    | -1.288280 | -0.167564 | -0.301522 |
| 4      | 6      | 0    | -4.082356 | -1.026303 | 1.548115  |
| 5      | 1      | 0    | -4.705559 | -1.572940 | 2.262168  |
| 6      | 1      | 0    | -4.484639 | -0.014793 | 1.447006  |
| 7      | 1      | 0    | -3.071240 | -0.972526 | 1.968523  |
| 8      | 6      | 0    | -4.091956 | -1.751704 | 0.222829  |
| 9      | 1      | 0    | -5.100616 | -1.805913 | -0.196448 |
| 10     | 1      | 0    | -3.675436 | -2.760465 | 0.301997  |
| 11     | 8      | 0    | -3.285426 | -0.987379 | -0.743835 |
| 12     | 1      | 0    | -3.355204 | -1.387395 | -1.622934 |
| 13     | 8      | 0    | 3.721722  | -2.783428 | -0.541693 |
| 14     | 8      | 0    | 3.000071  | -2.462392 | 0.383475  |

Zero-point correction= 0.087353 (Hartree/Particle)  
 Thermal correction to Energy= 0.102023  
 Thermal correction to Enthalpy= 0.102968  
 Thermal correction to Gibbs Free Energy= 0.033866  
 Sum of electronic and zero-point Energies= -711.498337  
 Sum of electronic and thermal Energies= -711.483667  
 Sum of electronic and thermal Enthalpies= -711.482722  
 Sum of electronic and thermal Free Energies= -711.551825

M06-L/def2-TZVP//b3lyp/6-31G(d,p)-LANL2DZ Single point energy: -712.753289

### INT3'

**Charge: 1 multiplicity: 3**

| Center Number | Atomic Number | Atomic Type | Coordinates (Angstroms) |           |           |
|---------------|---------------|-------------|-------------------------|-----------|-----------|
|               |               |             | X                       | Y         | Z         |
| 1             | 79            | 0           | 1.409497                | 0.742457  | -0.134043 |
| 2             | 79            | 0           | 0.627912                | -1.779112 | -0.017449 |
| 3             | 79            | 0           | -1.301222               | 0.047423  | 0.146715  |
| 4             | 6             | 0           | -5.287817               | 1.827407  | -0.443065 |
| 5             | 1             | 0           | -6.267793               | 1.450046  | -0.748770 |
| 6             | 1             | 0           | -5.409728               | 2.450618  | 0.445495  |
| 7             | 1             | 0           | -4.881008               | 2.436073  | -1.254837 |
| 8             | 6             | 0           | -4.368501               | 0.643380  | -0.160014 |
| 9             | 1             | 0           | -4.796120               | 0.034314  | 0.670602  |
| 10            | 1             | 0           | -4.243306               | -0.044077 | -1.007282 |
| 11            | 8             | 0           | -3.138800               | 1.049394  | 0.359612  |
| 12            | 1             | 0           | 3.274718                | 2.564256  | 1.369457  |
| 13            | 8             | 0           | 2.576961                | 2.607485  | -0.373583 |
| 14            | 8             | 0           | 3.324639                | 3.147292  | 0.579126  |

Zero-point correction= 0.084292 (Hartree/Particle)  
 Thermal correction to Energy= 0.098954  
 Thermal correction to Enthalpy= 0.099898  
 Thermal correction to Gibbs Free Energy= 0.030993  
 Sum of electronic and zero-point Energies= -711.434872  
 Sum of electronic and thermal Energies= -711.420210  
 Sum of electronic and thermal Enthalpies= -711.419266  
 Sum of electronic and thermal Free Energies= -711.488171

M06-L/def2-TZVP//b3lyp/6-31G(d,p)-LANL2DZ Single point energy: -712.691897

**INT4'****Charge: 1 multiplicity: 3**

| Center<br>Number | Atomic<br>Number | Atomic<br>Type | Coordinates (Angstroms) |           |           |
|------------------|------------------|----------------|-------------------------|-----------|-----------|
|                  |                  |                | X                       | Y         | Z         |
| 1                | 79               | 0              | -1.595057               | 1.070140  | -0.167374 |
| 2                | 79               | 0              | -1.090618               | -1.553354 | 0.131399  |
| 3                | 79               | 0              | 0.957885                | 0.236197  | 0.024120  |
| 4                | 6                | 0              | 5.126931                | -1.409387 | -0.499456 |
| 5                | 1                | 0              | 5.535589                | -2.368143 | -0.831187 |
| 6                | 1                | 0              | 5.336130                | -0.660831 | -1.268355 |
| 7                | 1                | 0              | 5.623831                | -1.115913 | 0.428009  |
| 8                | 6                | 0              | 3.623228                | -1.548431 | -0.293784 |
| 9                | 1                | 0              | 3.076052                | -1.891731 | -1.184301 |
| 10               | 1                | 0              | 3.420104                | -2.316450 | 0.490148  |
| 11               | 8                | 0              | 3.044763                | -0.406113 | 0.244828  |
| 12               | 8                | 0              | 2.302964                | 3.053946  | 0.924835  |
| 13               | 8                | 0              | 1.933731                | 2.565901  | -0.251820 |
| 14               | 1                | 0              | 2.751115                | 3.904416  | 0.718952  |

Zero-point correction= 0.083603 (Hartree/Particle)  
 Thermal correction to Energy= 0.098667  
 Thermal correction to Enthalpy= 0.099611  
 Thermal correction to Gibbs Free Energy= 0.029462  
 Sum of electronic and zero-point Energies= -711.420316  
 Sum of electronic and thermal Energies= -711.405253  
 Sum of electronic and thermal Enthalpies= -711.404308  
 Sum of electronic and thermal Free Energies= -711.489703

M06-L/def2-TZVP//b3lyp/6-31G(d,p)-LANL2DZ Single point energy: -712.681793

**INT5'****Charge: 1 multiplicity: 1**

| Center<br>Number | Atomic<br>Number | Atomic<br>Type | Coordinates (Angstroms) |           |           |
|------------------|------------------|----------------|-------------------------|-----------|-----------|
|                  |                  |                | X                       | Y         | Z         |
| 1                | 79               | 0              | -1.451781               | 0.661855  | -0.094852 |
| 2                | 79               | 0              | -0.536576               | -1.819343 | 0.077305  |
| 3                | 79               | 0              | 1.278189                | 0.132715  | -0.049238 |
| 4                | 6                | 0              | 5.549847                | 1.600118  | 0.074397  |
| 5                | 1                | 0              | 5.320740                | 2.583858  | -0.336064 |
| 6                | 1                | 0              | 6.278564                | 1.077891  | -0.559563 |
| 7                | 1                | 0              | -2.840882               | 2.894165  | -1.088010 |
| 8                | 6                | 0              | 4.332170                | 0.762600  | 0.198439  |
| 9                | 1                | 0              | 6.019884                | 1.694049  | 1.062276  |
| 10               | 1                | 0              | 4.449175                | -0.255190 | 0.603642  |
| 11               | 8                | 0              | 3.214842                | 1.169591  | -0.134465 |
| 12               | 1                | 0              | -3.511491               | 3.440810  | 1.182552  |
| 13               | 8                | 0              | -2.937842               | 2.375643  | -0.268585 |
| 14               | 8                | 0              | -2.640096               | 3.372914  | 0.749830  |

Zero-point correction= 0.086743 (Hartree/Particle)  
 Thermal correction to Energy= 0.101560  
 Thermal correction to Enthalpy= 0.102505  
 Thermal correction to Gibbs Free Energy= 0.034639



Sum of electronic and zero-point Energies= -711.538888  
 Sum of electronic and thermal Energies= -711.524071  
 Sum of electronic and thermal Enthalpies= -711.523126  
 Sum of electronic and thermal Free Energies= -711.590992  
 M06-L/def2-TZVP//b3lyp/6-31G(d,p)-LANL2DZ Single point energy: -712.776271

### INT3a'

**Charge: 1 multiplicity: 3**

| Center Number | Atomic Number | Atomic Type | Coordinates (Angstroms) |           |           |
|---------------|---------------|-------------|-------------------------|-----------|-----------|
|               |               |             | X                       | Y         | Z         |
| 1             | 79            | 0           | -1.444921               | -0.705894 | -0.089599 |
| 2             | 79            | 0           | -0.541450               | 1.791591  | 0.104524  |
| 3             | 79            | 0           | 1.271427                | -0.131278 | -0.134201 |
| 4             | 6             | 0           | 5.620916                | -1.299586 | 0.301096  |
| 5             | 1             | 0           | 6.276103                | -1.056415 | 1.141777  |
| 6             | 1             | 0           | 5.810650                | -2.349462 | 0.024846  |
| 7             | 1             | 0           | 5.924437                | -0.668736 | -0.544973 |
| 8             | 6             | 0           | 4.211095                | -1.062006 | 0.692082  |
| 9             | 1             | 0           | 3.798263                | -1.334196 | 1.656383  |
| 10            | 1             | 0           | -3.966531               | -3.547593 | 0.590670  |
| 11            | 8             | 0           | 3.229861                | -1.203630 | -0.317539 |
| 12            | 8             | 0           | -2.906196               | -2.343521 | -0.308871 |
| 13            | 8             | 0           | -3.322512               | -2.849864 | 0.849839  |
| 14            | 1             | 0           | 3.636321                | -1.097038 | -1.192374 |

Zero-point correction= 0.084780 (Hartree/Particle)  
 Thermal correction to Energy= 0.099691  
 Thermal correction to Enthalpy= 0.100635  
 Thermal correction to Gibbs Free Energy= 0.023098  
 Sum of electronic and zero-point Energies= -711.446089  
 Sum of electronic and thermal Energies= -711.431178  
 Sum of electronic and thermal Enthalpies= -711.430234  
 Sum of electronic and thermal Free Energies= -711.498771

M06-L/def2-TZVP//b3lyp/6-31G(d,p)-LANL2DZ Single point energy: -712.682176

### INT3b'

**Charge: 1 multiplicity: 3**

| Center Number | Atomic Number | Atomic Type | Coordinates (Angstroms) |           |           |
|---------------|---------------|-------------|-------------------------|-----------|-----------|
|               |               |             | X                       | Y         | Z         |
| 1             | 79            | 0           | 0.333510                | 1.840995  | 0.023470  |
| 2             | 79            | 0           | 1.344330                | -0.618731 | -0.011524 |
| 3             | 79            | 0           | -1.376646               | -0.302675 | -0.033943 |
| 4             | 6             | 0           | -2.406050               | -2.256164 | 0.004458  |
| 5             | 1             | 0           | -2.203827               | -2.614047 | -1.005893 |
| 6             | 1             | 0           | 4.351209                | -1.146163 | 0.126754  |
| 7             | 1             | 0           | -1.908248               | -2.823902 | 0.788926  |
| 8             | 6             | 0           | -3.802991               | -1.758265 | 0.281821  |
| 9             | 1             | 0           | -4.569405               | -2.265633 | -0.311601 |
| 10            | 1             | 0           | -4.067452               | -1.824169 | 1.337601  |
| 11            | 8             | 0           | -3.792296               | -0.321335 | -0.031443 |
| 12            | 8             | 0           | 4.176324                | -2.111332 | 0.058505  |
| 13            | 8             | 0           | 2.865053                | -2.280982 | -0.025487 |
| 14            | 1             | 0           | -4.135022               | -0.177887 | -0.928257 |

-----

Zero-point correction= 0.086245 (Hartree/Particle)  
 Thermal correction to Energy= 0.100545  
 Thermal correction to Enthalpy= 0.101489  
 Thermal correction to Gibbs Free Energy= 0.034409  
 Sum of electronic and zero-point Energies= -711.438879  
 Sum of electronic and thermal Energies= -711.424579  
 Sum of electronic and thermal Enthalpies= -711.423635  
 Sum of electronic and thermal Free Energies= -711.490715

M06-L/def2-TZVP//b3lyp/6-31G(d,p)-LANL2DZ Single point energy: -712.683793

**TS1'**

**Charge: 1 multiplicity: 3**

-----

| Center Number | Atomic Number | Atomic Type | Coordinates (Angstroms) |           |           |
|---------------|---------------|-------------|-------------------------|-----------|-----------|
|               |               |             | X                       | Y         | Z         |
| 1             | 79            | 0           | -1.926810               | -0.702578 | 0.081144  |
| 2             | 79            | 0           | -0.335174               | 1.453913  | 0.080668  |
| 3             | 79            | 0           | 0.740125                | -0.983593 | -0.233410 |
| 4             | 6             | 0           | 3.825646                | -2.131962 | 0.578946  |
| 5             | 1             | 0           | 4.650911                | -2.453206 | 1.221627  |
| 6             | 1             | 0           | 4.033824                | -2.466084 | -0.441375 |
| 7             | 1             | 0           | 2.920134                | -2.632121 | 0.946655  |
| 8             | 6             | 0           | 3.679456                | -0.622957 | 0.641061  |
| 9             | 1             | 0           | 4.603551                | -0.125361 | 0.292528  |
| 10            | 1             | 0           | 3.498866                | -0.252641 | 1.662238  |
| 11            | 8             | 0           | 2.673114                | -0.121243 | -0.230835 |
| 12            | 1             | 0           | 2.570246                | 1.360018  | -0.288599 |
| 13            | 8             | 0           | 2.571561                | 2.417621  | -0.318200 |
| 14            | 8             | 0           | 1.370170                | 2.884527  | -0.083069 |

-----

Zero-point correction= 0.083537 (Hartree/Particle)  
 Thermal correction to Energy= 0.096212  
 Thermal correction to Enthalpy= 0.097156  
 Thermal correction to Gibbs Free Energy= 0.036676  
 Sum of electronic and zero-point Energies= -711.427367  
 Sum of electronic and thermal Energies= -711.414691  
 Sum of electronic and thermal Enthalpies= -711.413747  
 Sum of electronic and thermal Free Energies= -711.641711

M06-L/def2-TZVP//b3lyp/6-31G(d,p)-LANL2DZ Single point energy: -712.678387

**TS1a'**

**Charge: 1 multiplicity: 3**

-----

| Center Number | Atomic Number | Atomic Type | Coordinates (Angstroms) |           |           |
|---------------|---------------|-------------|-------------------------|-----------|-----------|
|               |               |             | X                       | Y         | Z         |
| 1             | 79            | 0           | -2.104209               | -0.096877 | 0.071137  |
| 2             | 79            | 0           | 0.139202                | 1.380289  | -0.009171 |
| 3             | 79            | 0           | 0.225889                | -1.362700 | -0.086951 |
| 4             | 6             | 0           | 4.854044                | -0.853746 | 0.282505  |
| 5             | 1             | 0           | 5.107831                | -0.822862 | -0.783623 |
| 6             | 1             | 0           | 5.374871                | -0.030742 | 0.778913  |
| 7             | 1             | 0           | 5.237817                | -1.794746 | 0.701728  |
| 8             | 6             | 0           | 3.377231                | -0.748986 | 0.514989  |

-----

|    |   |   |          |           |           |
|----|---|---|----------|-----------|-----------|
| 9  | 1 | 0 | 3.014532 | -0.633642 | 1.538107  |
| 10 | 1 | 0 | 3.098639 | 0.697637  | 0.055866  |
| 11 | 8 | 0 | 2.579062 | -1.684513 | -0.141534 |
| 12 | 8 | 0 | 2.096927 | 2.447064  | -0.180697 |
| 13 | 8 | 0 | 3.221817 | 1.791862  | -0.193522 |
| 14 | 1 | 0 | 2.986487 | -1.970772 | -0.976107 |

-----  
Zero-point correction= 0.081571 (Hartree/Particle)  
Thermal correction to Energy= 0.094718  
Thermal correction to Enthalpy= 0.095662  
Thermal correction to Gibbs Free Energy= 0.034495  
Sum of electronic and zero-point Energies= -711.434679  
Sum of electronic and thermal Energies= -711.421532  
Sum of electronic and thermal Enthalpies= -711.420588  
Sum of electronic and thermal Free Energies= -711.460755

M06-L/def2-TZVP//b3lyp/6-31G(d,p)-LANL2DZ Single point energy: -712.6741146

### TS1b'

**Charge: 1 multiplicity: 3**

-----

| Center Number | Atomic Number | Atomic Type | Coordinates (Angstroms) |           |           |
|---------------|---------------|-------------|-------------------------|-----------|-----------|
|               |               |             | X                       | Y         | Z         |
| 1             | 79            | 0           | -2.026701               | -0.217763 | 0.050044  |
| 2             | 79            | 0           | 0.056671                | 1.435995  | -0.023018 |
| 3             | 79            | 0           | 0.396799                | -1.309346 | -0.047378 |
| 4             | 6             | 0           | 3.598728                | -0.225481 | 0.774859  |
| 5             | 1             | 0           | 4.561498                | 0.253963  | 0.959933  |
| 6             | 1             | 0           | 3.067846                | 1.131859  | 0.198012  |
| 7             | 1             | 0           | 2.967510                | -0.341650 | 1.656190  |
| 8             | 6             | 0           | 3.651733                | -1.367018 | -0.184563 |
| 9             | 1             | 0           | 3.781797                | -1.031742 | -1.222334 |
| 10            | 1             | 0           | 4.516128                | -1.999930 | 0.069490  |
| 11            | 8             | 0           | 2.464476                | -2.194312 | -0.069553 |
| 12            | 8             | 0           | 3.071405                | 2.195743  | -0.122198 |
| 13            | 8             | 0           | 1.880288                | 2.713260  | -0.178574 |
| 14            | 1             | 0           | 2.558411                | -2.977018 | -0.632658 |

-----  
Zero-point correction= 0.081217 (Hartree/Particle)  
Thermal correction to Energy= 0.094194  
Thermal correction to Enthalpy= 0.095138  
Thermal correction to Gibbs Free Energy= 0.034295  
Sum of electronic and zero-point Energies= -711.427847  
Sum of electronic and thermal Energies= -711.414870  
Sum of electronic and thermal Enthalpies= -711.413926  
Sum of electronic and thermal Free Energies= -711.457169

M06-L/def2-TZVP//b3lyp/6-31G(d,p)-LANL2DZ Single point energy: -712.665181

### TS2'

**Charge: 1 multiplicity: 3**

-----

| Center Number | Atomic Number | Atomic Type | Coordinates (Angstroms) |           |           |
|---------------|---------------|-------------|-------------------------|-----------|-----------|
|               |               |             | X                       | Y         | Z         |
| 1             | 79            | 0           | -1.512061               | 1.226025  | -0.121650 |
| 2             | 79            | 0           | -1.298266               | -1.421227 | 0.113891  |

|    |    |   |          |           |           |
|----|----|---|----------|-----------|-----------|
| 3  | 79 | 0 | 0.950029 | 0.087107  | -0.017816 |
| 4  | 6  | 0 | 5.141170 | -1.217934 | -0.168695 |
| 5  | 1  | 0 | 5.940017 | -0.604152 | -0.593248 |
| 6  | 1  | 0 | 5.234019 | -1.239678 | 0.919451  |
| 7  | 1  | 0 | 5.242903 | -2.240391 | -0.549969 |
| 8  | 6  | 0 | 3.800598 | -0.635156 | -0.574710 |
| 9  | 1  | 0 | 3.544681 | 0.660923  | -0.275358 |
| 10 | 1  | 0 | 3.678126 | -0.465315 | -1.665726 |
| 11 | 8  | 0 | 2.741431 | -1.195988 | 0.003513  |
| 12 | 8  | 0 | 2.923287 | 2.171132  | 1.113373  |
| 13 | 8  | 0 | 2.686720 | 1.578244  | -0.147902 |
| 14 | 1  | 0 | 2.861707 | 3.119595  | 0.893835  |

-----

Zero-point correction= 0.079677 (Hartree/Particle)  
 Thermal correction to Energy= 0.093309  
 Thermal correction to Enthalpy= 0.094253  
 Thermal correction to Gibbs Free Energy= 0.031133  
 Sum of electronic and zero-point Energies= -711.395871  
 Sum of electronic and thermal Energies= -711.382239  
 Sum of electronic and thermal Enthalpies= -711.381295  
 Sum of electronic and thermal Free Energies= -711.444415

M06-L/def2-TZVP//b3lyp/6-31G(d,p)-LANL2DZ Single point energy: -712.669449

## TS2a'

**Charge: 1 multiplicity: 3**

-----

| Center<br>Number | Atomic<br>Number | Atomic<br>Type | Coordinates (Angstroms) |           |           |
|------------------|------------------|----------------|-------------------------|-----------|-----------|
|                  |                  |                | X                       | Y         | Z         |
| 1                | 79               | 0              | 1.423984                | 1.308612  | -0.095818 |
| 2                | 79               | 0              | 1.487852                | -1.324916 | 0.226176  |
| 3                | 79               | 0              | -0.911459               | -0.066174 | -0.252573 |
| 4                | 6                | 0              | -5.137032               | -1.405675 | -0.329111 |
| 5                | 1                | 0              | -5.909489               | -1.365548 | 0.443092  |
| 6                | 1                | 0              | -5.451404               | -0.814437 | -1.192731 |
| 7                | 1                | 0              | -5.018050               | -2.448265 | -0.651007 |
| 8                | 6                | 0              | -3.823890               | -0.885627 | 0.226210  |
| 9                | 1                | 0              | -4.059558               | 0.539658  | 0.795713  |
| 10               | 1                | 0              | -3.512802               | -1.296335 | 1.206365  |
| 11               | 8                | 0              | -2.849269               | -0.728567 | -0.654496 |
| 12               | 8                | 0              | -2.925314               | 2.049402  | 0.475666  |
| 13               | 8                | 0              | -3.928819               | 1.527379  | 1.266984  |
| 14               | 1                | 0              | -2.685714               | 2.862786  | 0.965703  |

-----

Zero-point correction= 0.079650 (Hartree/Particle)  
 Thermal correction to Energy= 0.093450  
 Thermal correction to Enthalpy= 0.094394  
 Thermal correction to Gibbs Free Energy= 0.028680  
 Sum of electronic and zero-point Energies= -711.392502  
 Sum of electronic and thermal Energies= -711.378702  
 Sum of electronic and thermal Enthalpies= -711.377757  
 Sum of electronic and thermal Free Energies= -711.443471

M06-L/def2-TZVP//b3lyp/6-31G(d,p)-LANL2DZ Single point energy: -712.667849
